# Supplementary material for: Chiral Bromonium Salt (Hypervalent Bromine(III)) with N-Nitrosamine as a Halogen-Bonding Bifunctional Catalyst
Source: MDPI journal article supplement (doi:10.3390/molecules28010384), 2023-01-02
Supplement: s1 [file s1]

**Table S1.** Results for the titration reactions shown in Figure 3 and 4.

| Concentration of <b>4a</b><br>/ M | Concentration of <b>5a</b><br>/ M | Equivalent<br>of <b>5a</b> | Chemical shift<br>for H1 | Chemical shift<br>for H4 |
|-----------------------------------|-----------------------------------|----------------------------|--------------------------|--------------------------|
| 8.80E-03                          | 0                                 | 0                          | 8.693                    | 7.7614                   |
| 8.80E-03                          | 0.22                              | 25                         | 8.695                    | 7.7609                   |
| 8.80E-03                          | 0.44                              | 50                         | 8.699                    | 7.7604                   |
| 8.80E-03                          | 0.66                              | 75                         | 8.701                    | 7.7599                   |
| 8.80E-03                          | 0.88                              | 100                        | 8.705                    | 7.7594                   |
| 8.80E-03                          | 1.1                               | 125                        | 8.708                    | 7.7589                   |
| 8.80E-03                          | 1.32                              | 150                        | 8.712                    | 7.7585                   |
| 8.80E-03                          | 1.54                              | 175                        | 8.716                    | 7.758                    |
| 8.80E-03                          | 1.76                              | 200                        | 8.72                     | 7.7575                   |

| Concentration of <b>4a</b><br>/ M | Concentration of <b>6a</b><br>/ M | Equivalent<br>of <b>6a</b> | Chemical shift<br>for H1 | Chemical shift<br>for H4 |
|-----------------------------------|-----------------------------------|----------------------------|--------------------------|--------------------------|
| 8.80E-03                          | 0                                 | 0                          | 8.692                    | 7.7621                   |
| 8.80E-03                          | 0.22                              | 25                         | 8.701                    | 7.76595                  |
| 8.80E-03                          | 0.44                              | 50                         | 8.703                    | 7.76705                  |
| 8.80E-03                          | 0.66                              | 75                         | 8.707                    | 7.76835                  |
| 8.80E-03                          | 0.88                              | 100                        | 8.708                    | 7.7687                   |
| 8.80E-03                          | 1.1                               | 125                        | 8.71                     | 7.7693                   |
| 8.80E-03                          | 1.32                              | 150                        | 8.712                    | 7.77                     |
| 8.80E-03                          | 1.54                              | 175                        | 8.717                    | 7.77125                  |
| 8.80E-03                          | 1.76                              | 200                        | 8.719                    | 7.7717                   |

<sup>1</sup>H, <sup>13</sup>C, and <sup>19</sup>F-NMR spectra and HPLC charts.

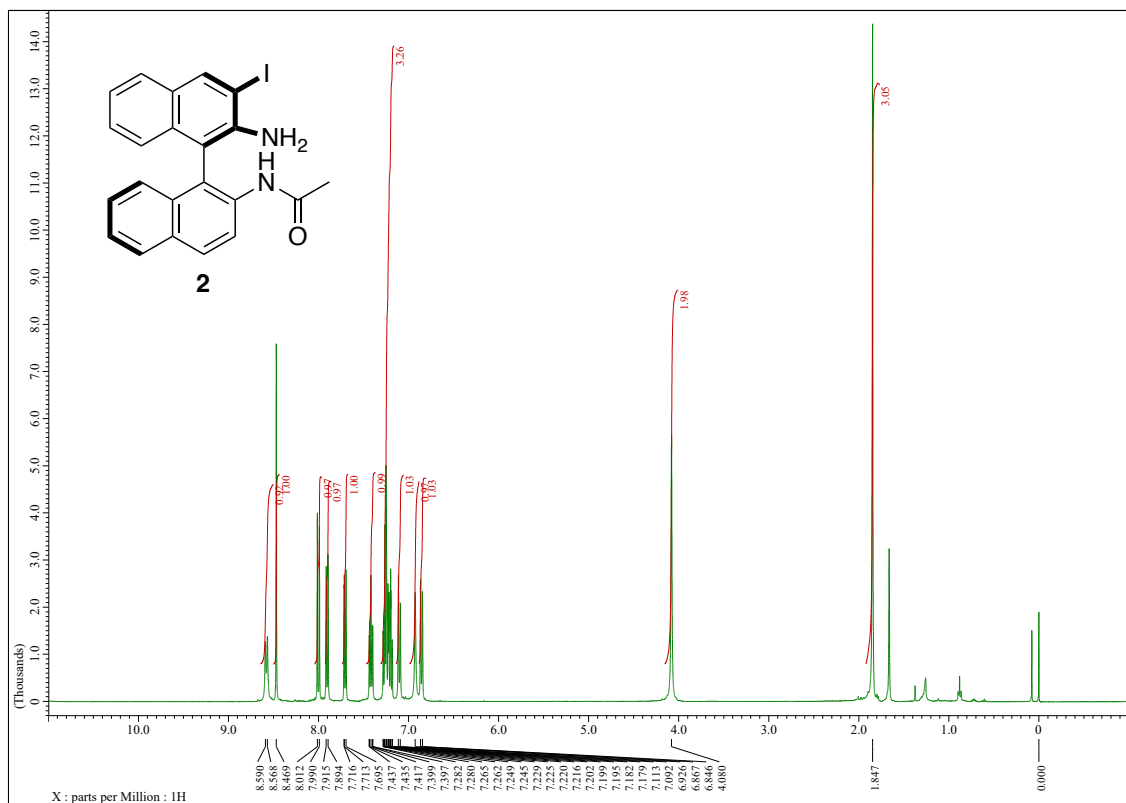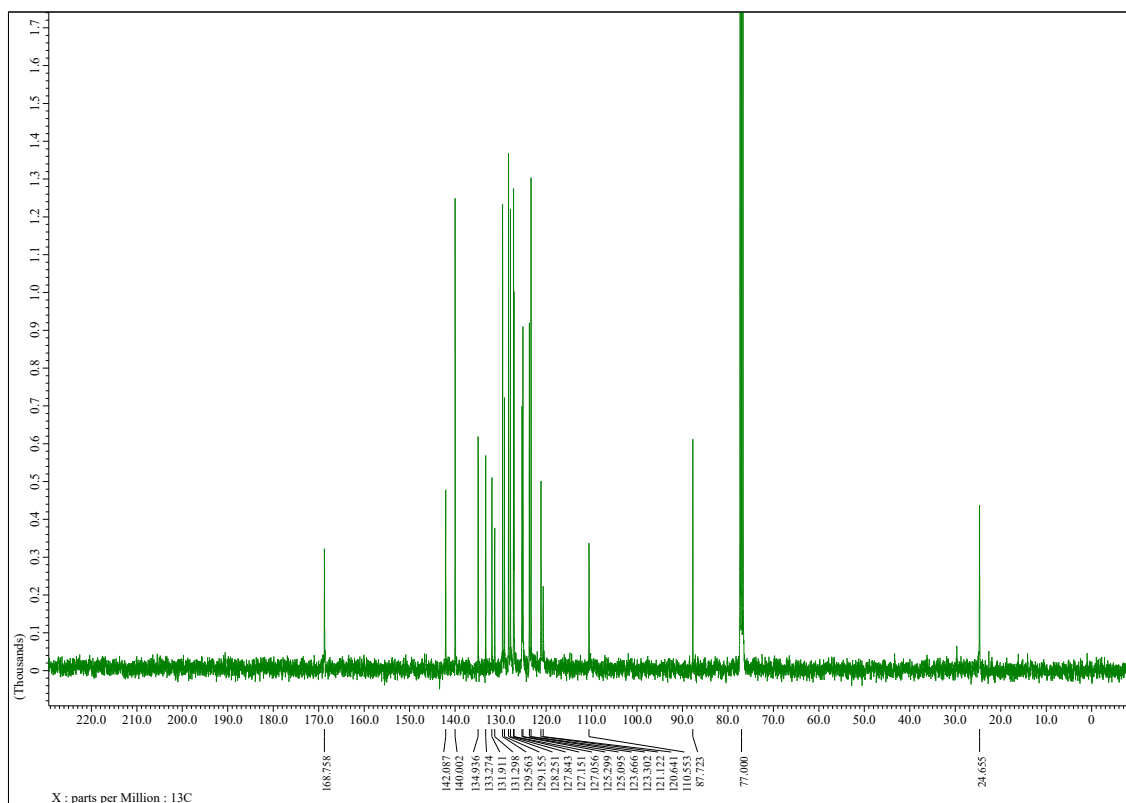

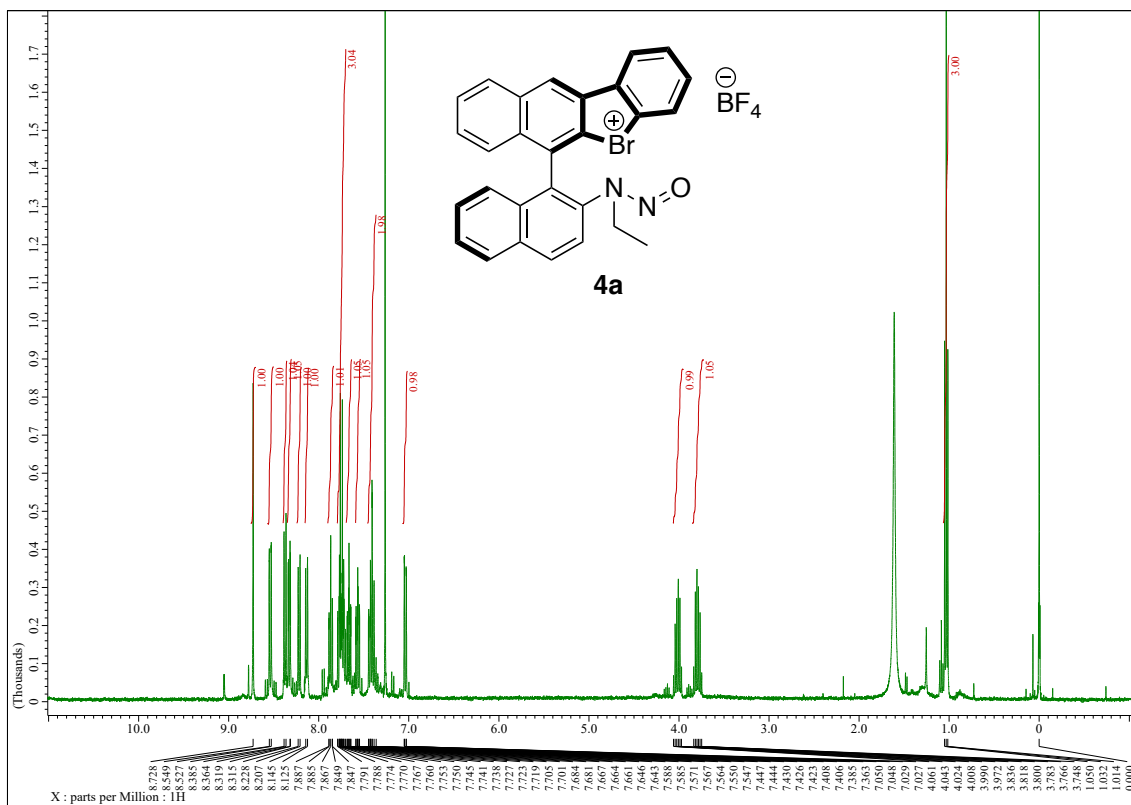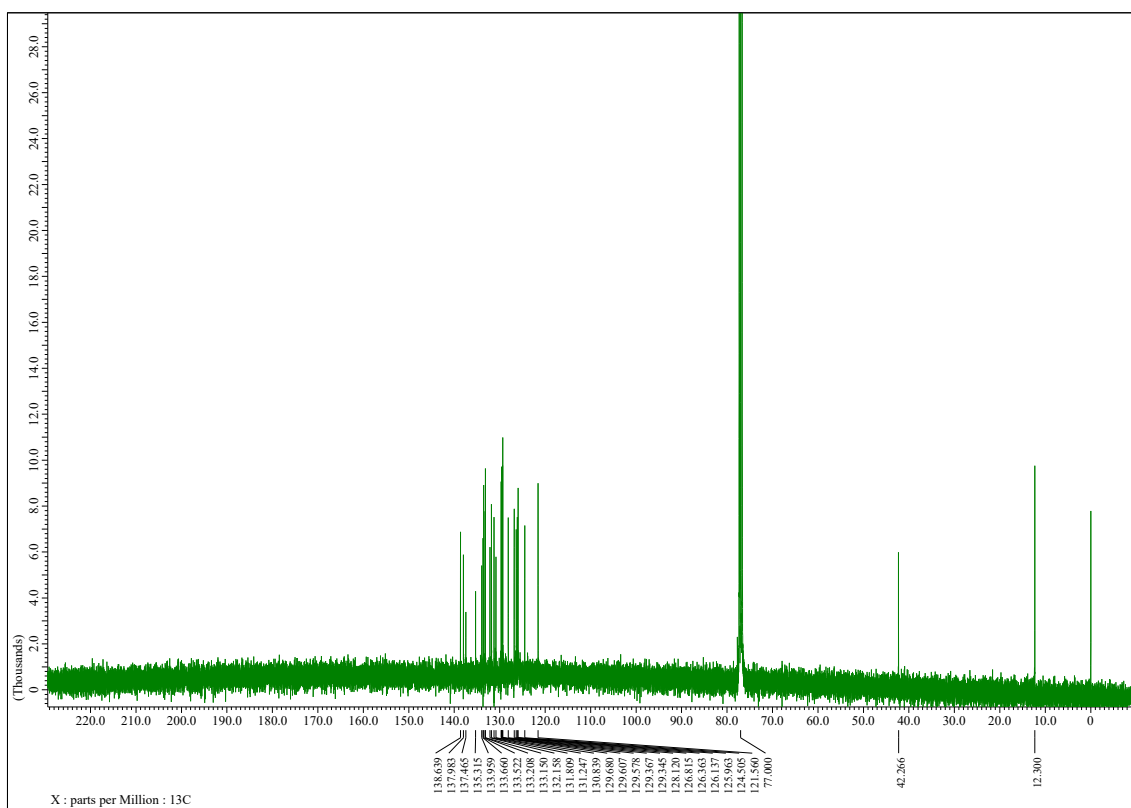

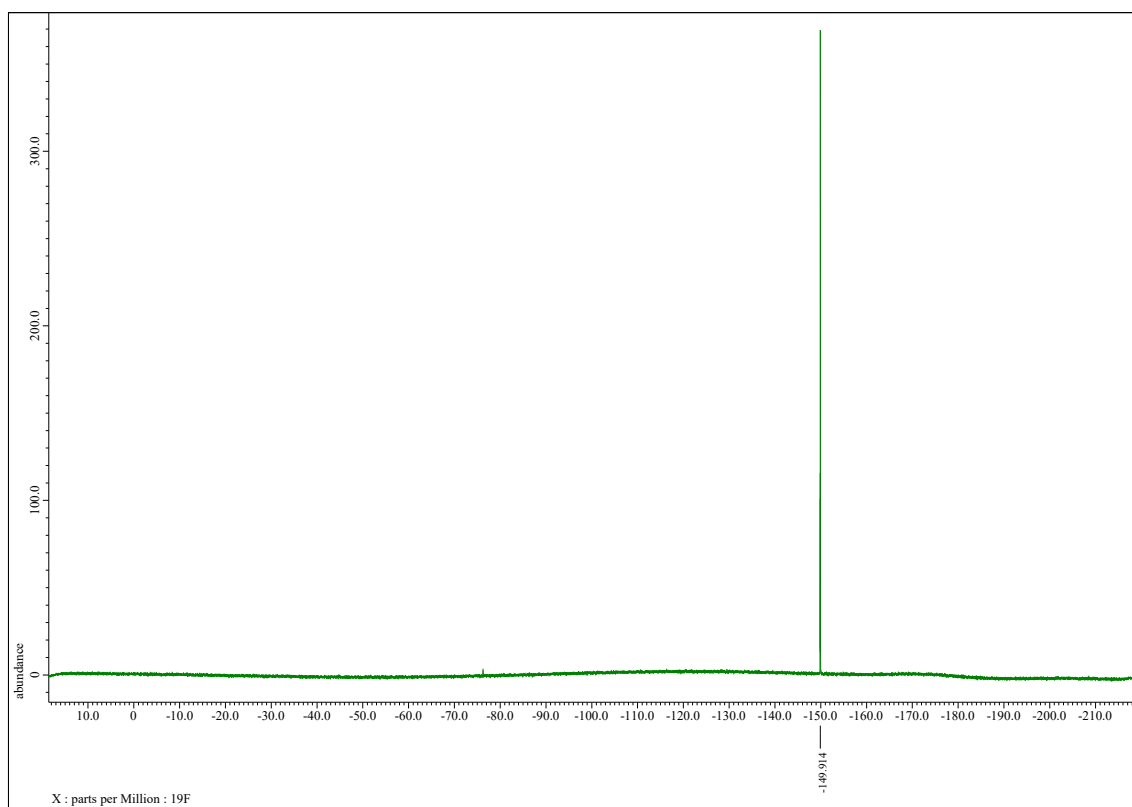

H-H COSY of **4a**

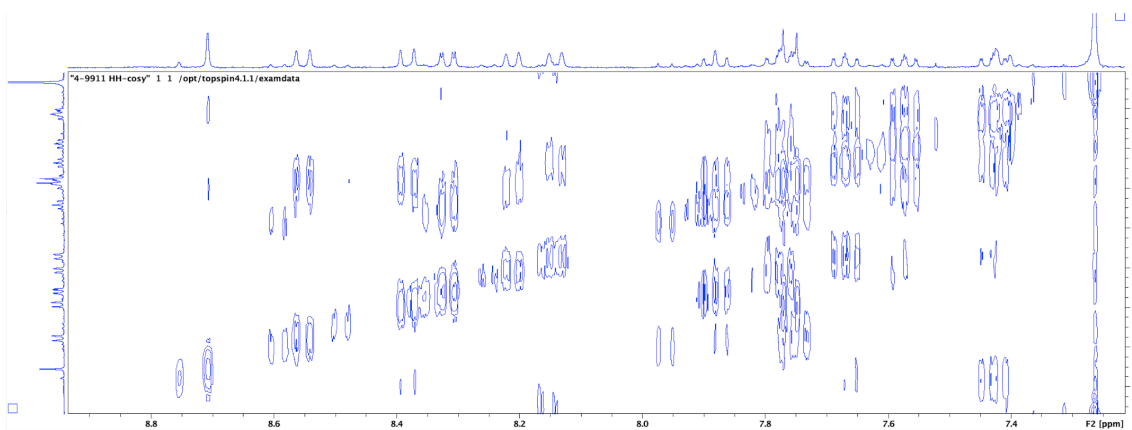



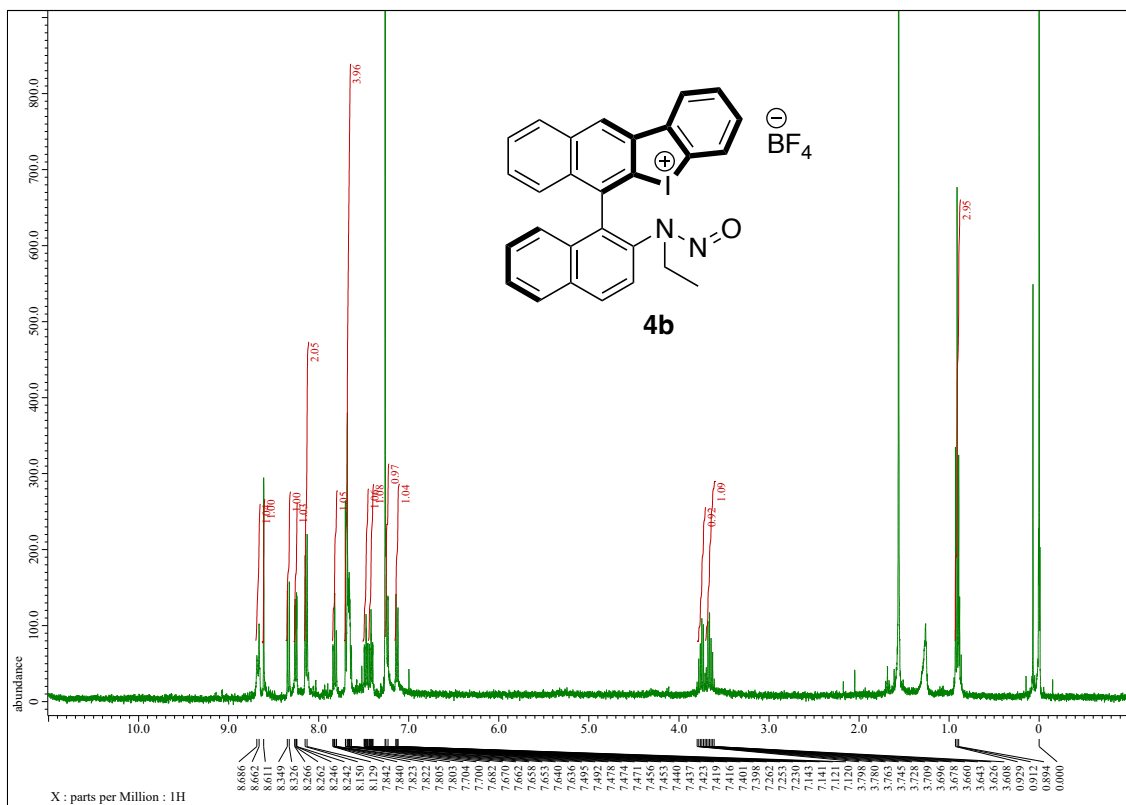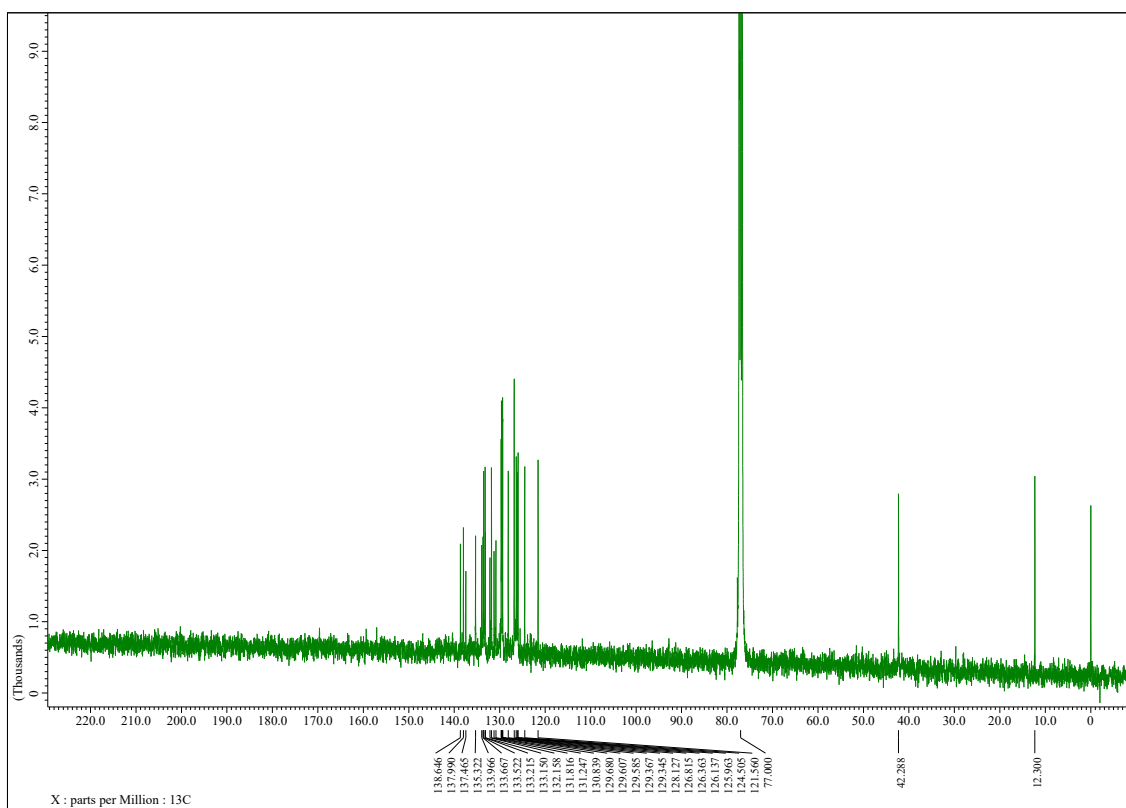

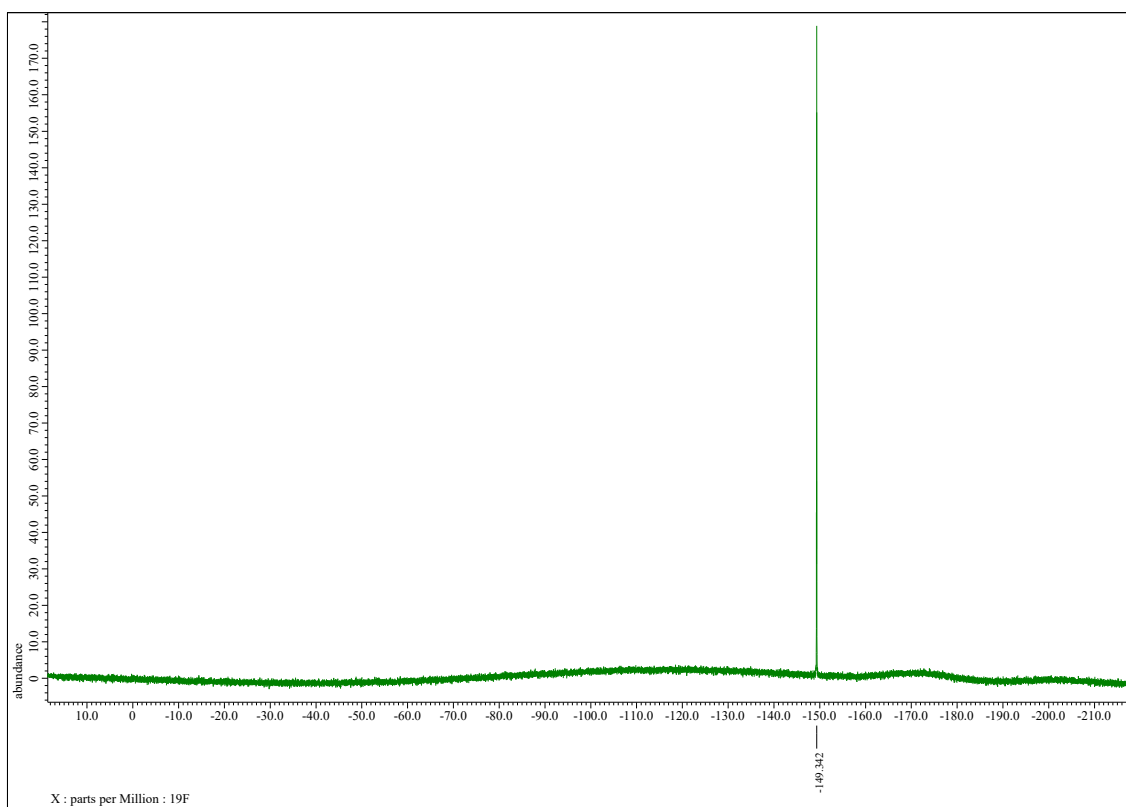

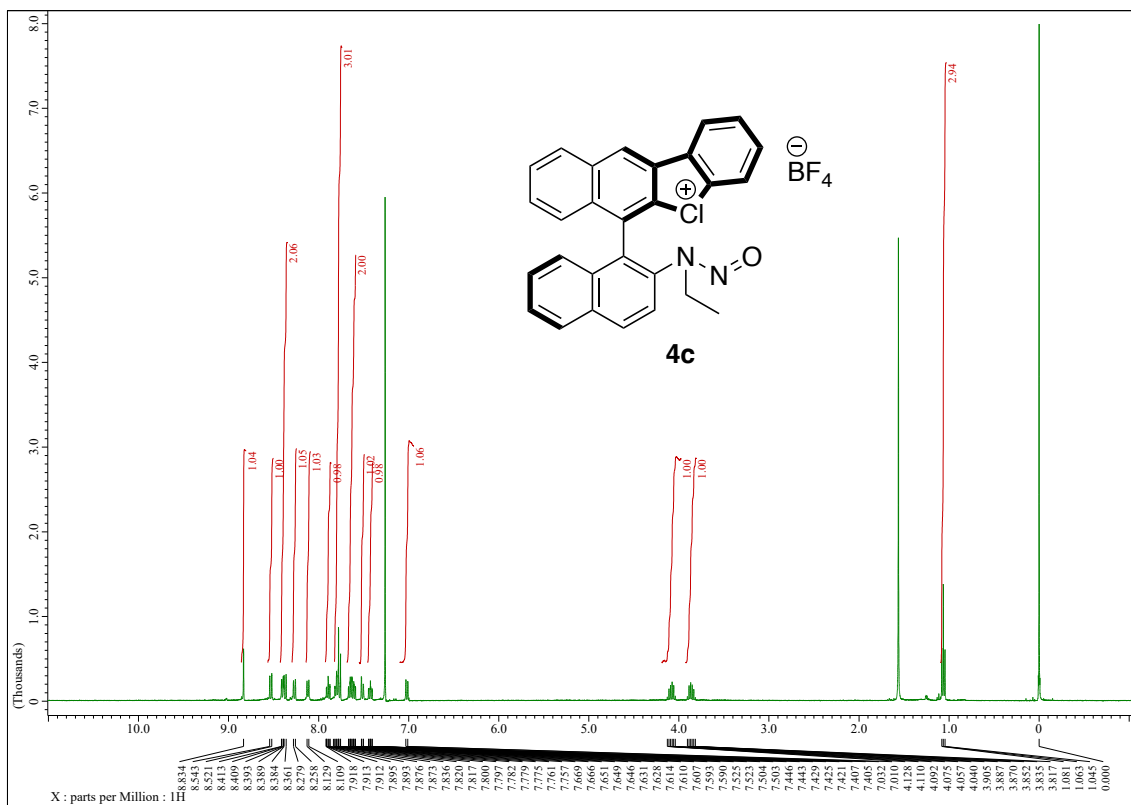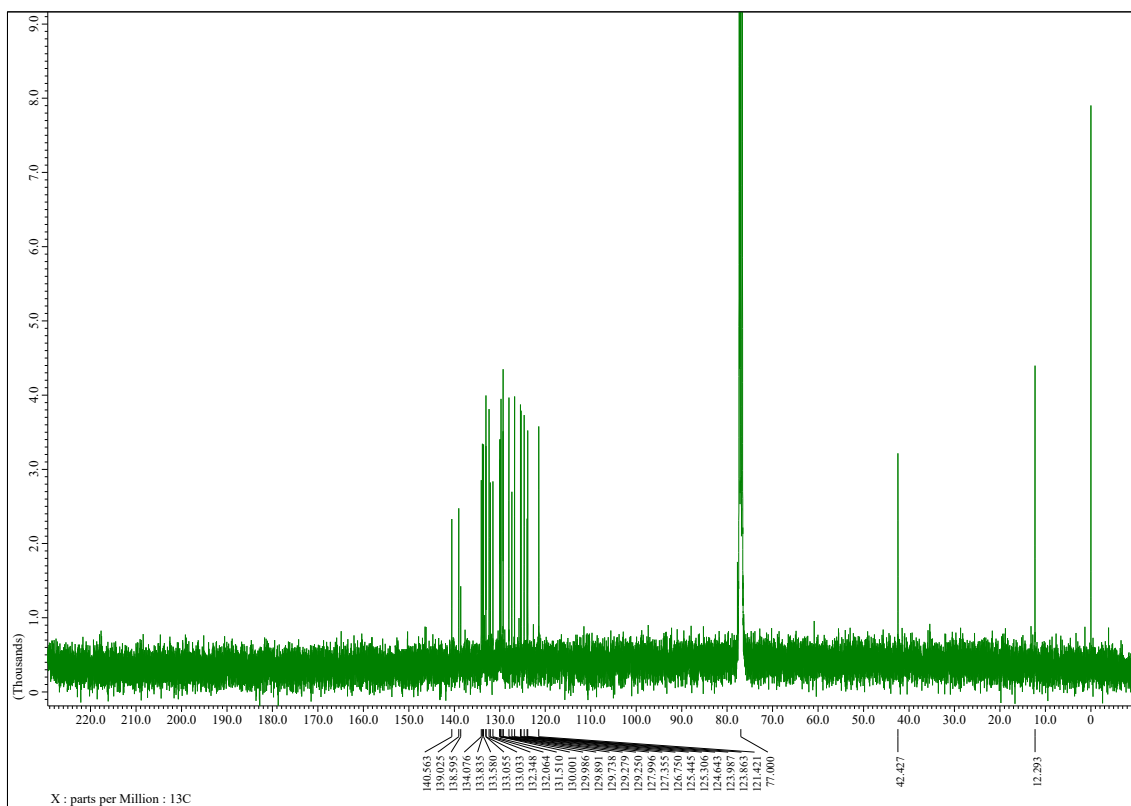

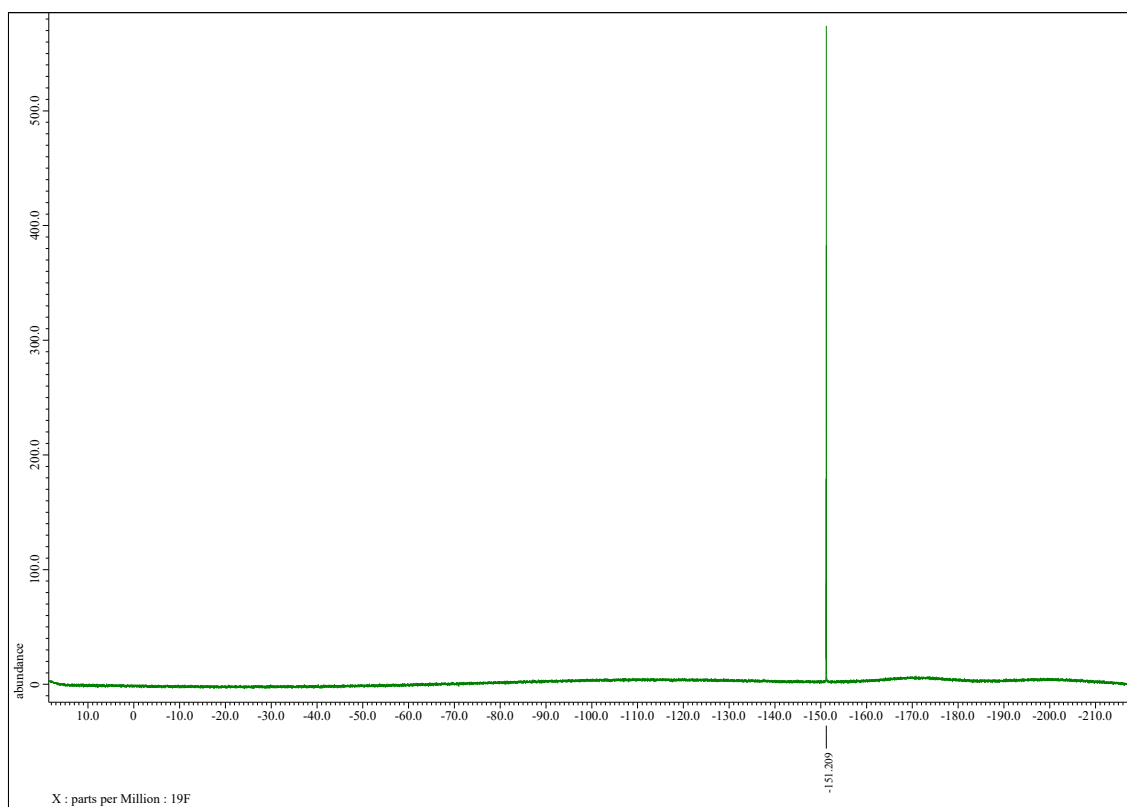

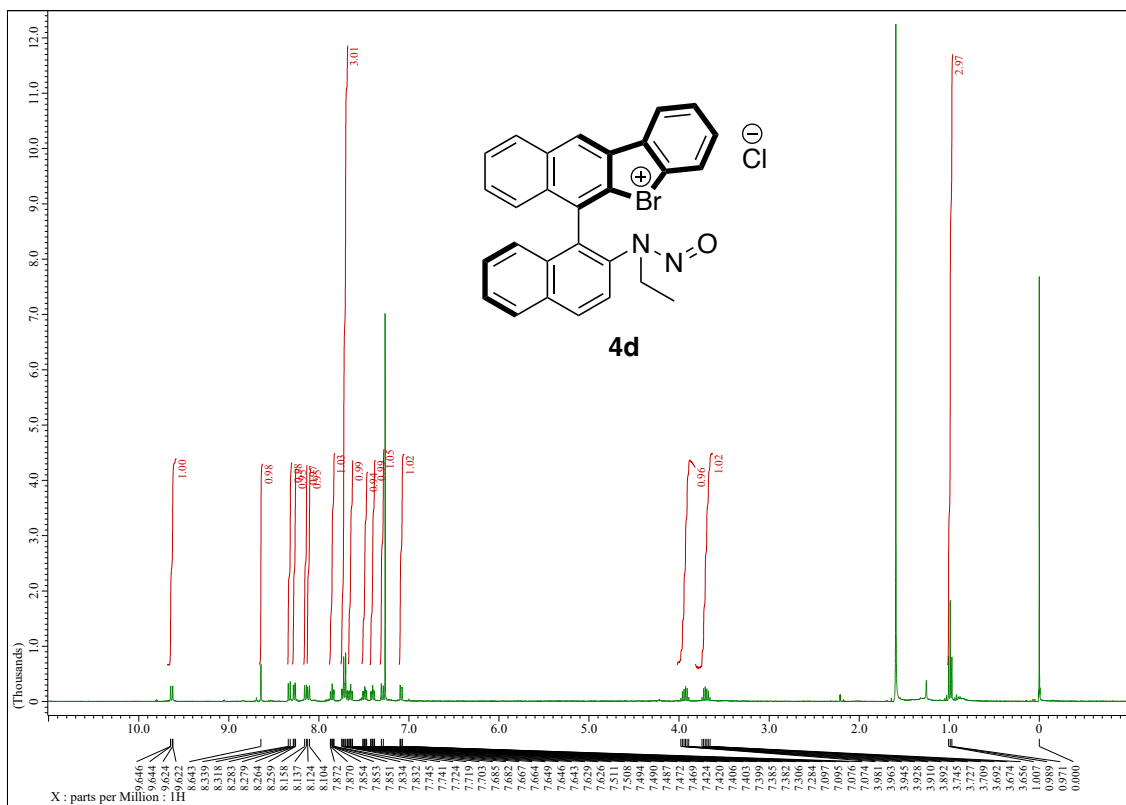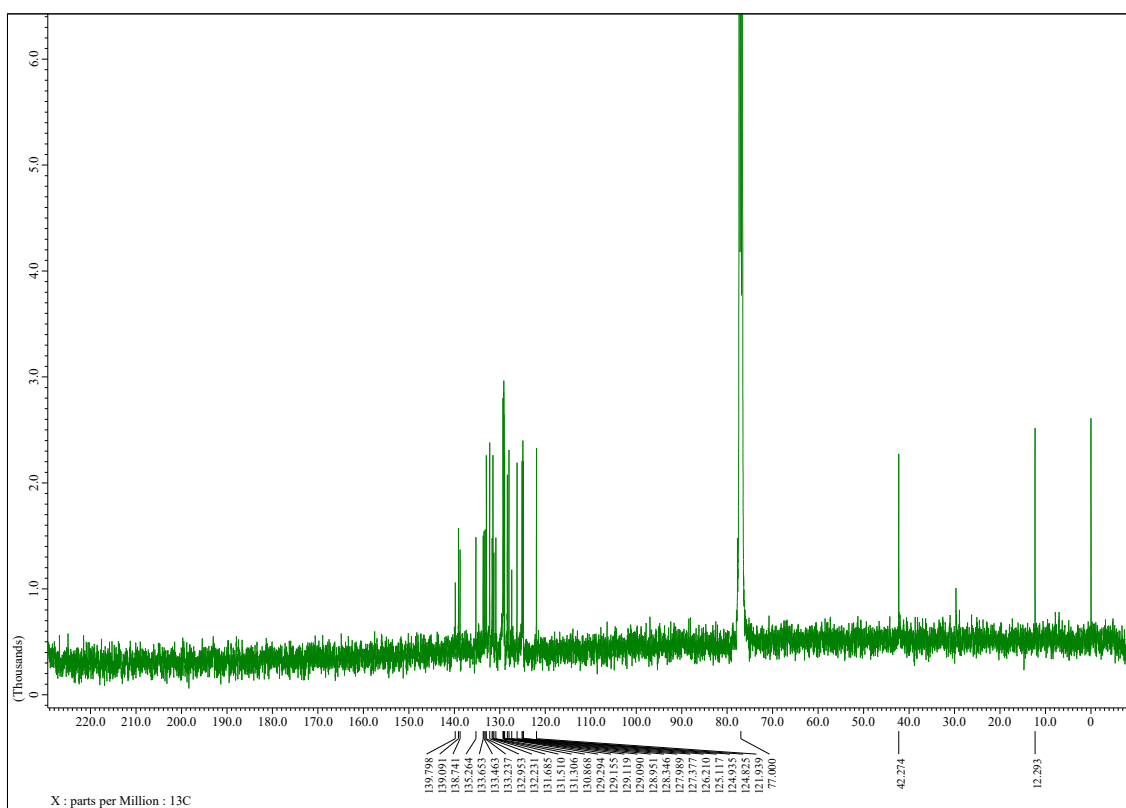

- HPLC charts of **7a** for Scheme 2.

Racemic sample of **7a**

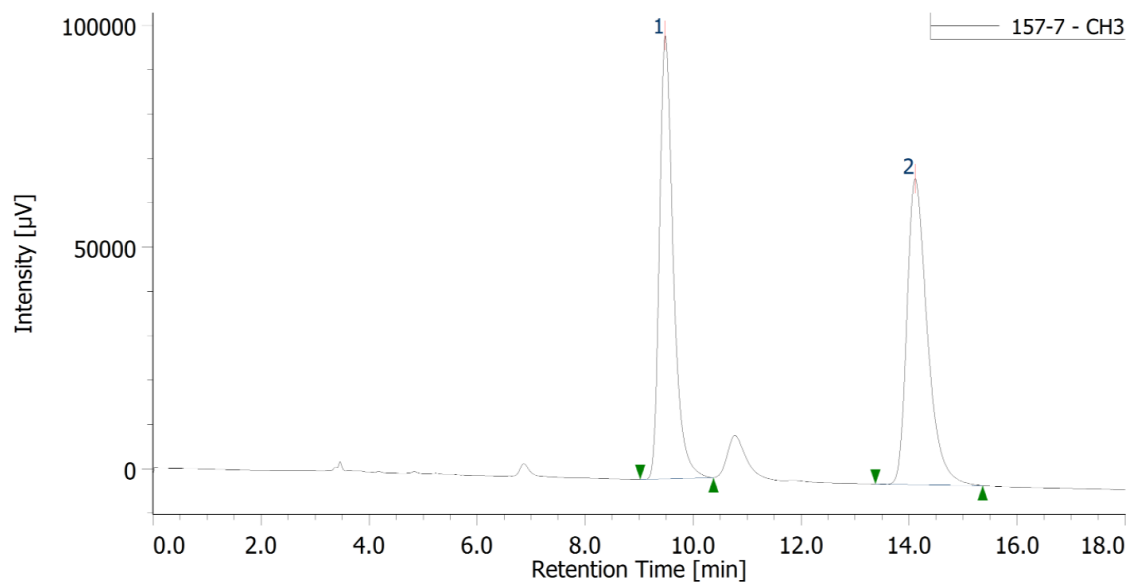

| # | ピーク名    | CH | tR [min] | Area [μV·sec] | Height [μV] | Area%  | Height% |
|---|---------|----|----------|---------------|-------------|--------|---------|
| 1 | Unknown | 3  | 9.48     | 1775891       | 99921       | 49.539 | 59.170  |
| 2 | Unknown | 3  | 14.11    | 1808946       | 68951       | 50.461 | 40.830  |

Catalyzed by **4a**

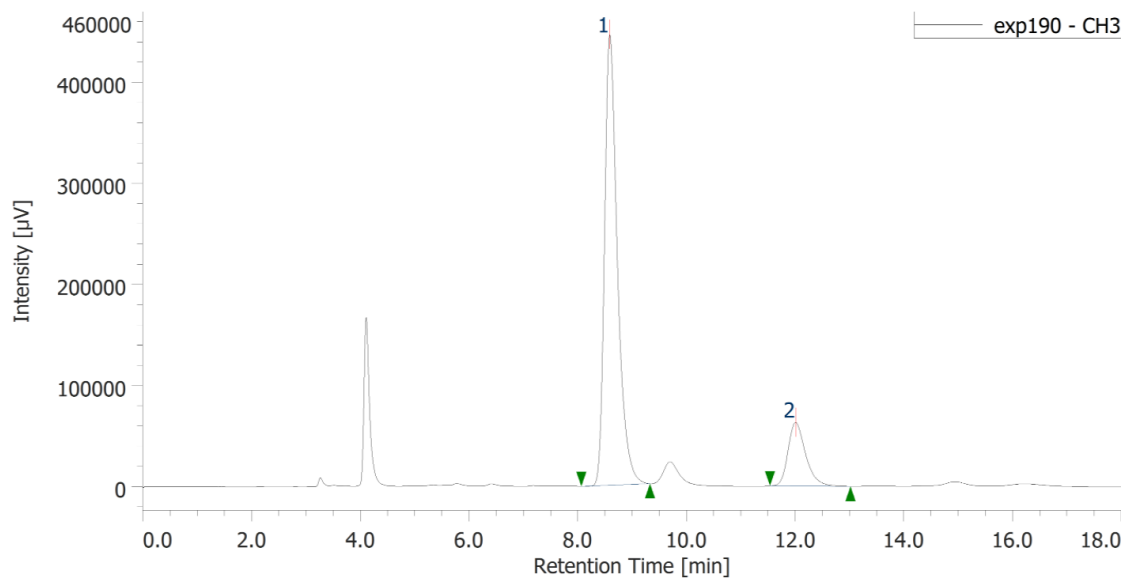

| # | ピーク名    | CH | tR [min] | Area [μV·sec] | Height [μV] | Area%  | Height% |
|---|---------|----|----------|---------------|-------------|--------|---------|
| 1 | Unknown | 3  | 8.59     | 7331298       | 445910      | 83.891 | 87.648  |
| 2 | Unknown | 3  | 12.01    | 1407809       | 62840       | 16.109 | 12.352  |

Catalyzed by **4b**

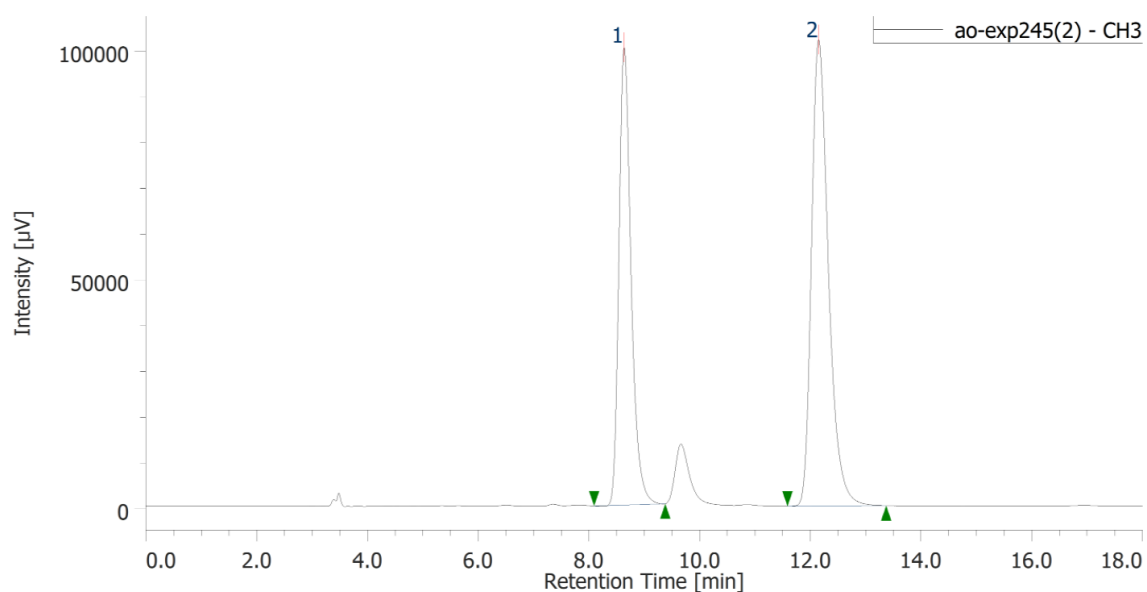

| # | ピーク名    | CH | tR [min] | 面積 [μV·sec] | 高さ [μV] | 面積%  | 高さ%  |
|---|---------|----|----------|-------------|---------|------|------|
| 1 | Unknown | 3  | 8.633    | 1522932     | 99893   | 41.4 | 49.5 |
| 2 | Unknown | 3  | 12.150   | 2157293     | 101828  | 58.6 | 50.5 |

Catalyzed by **4c**

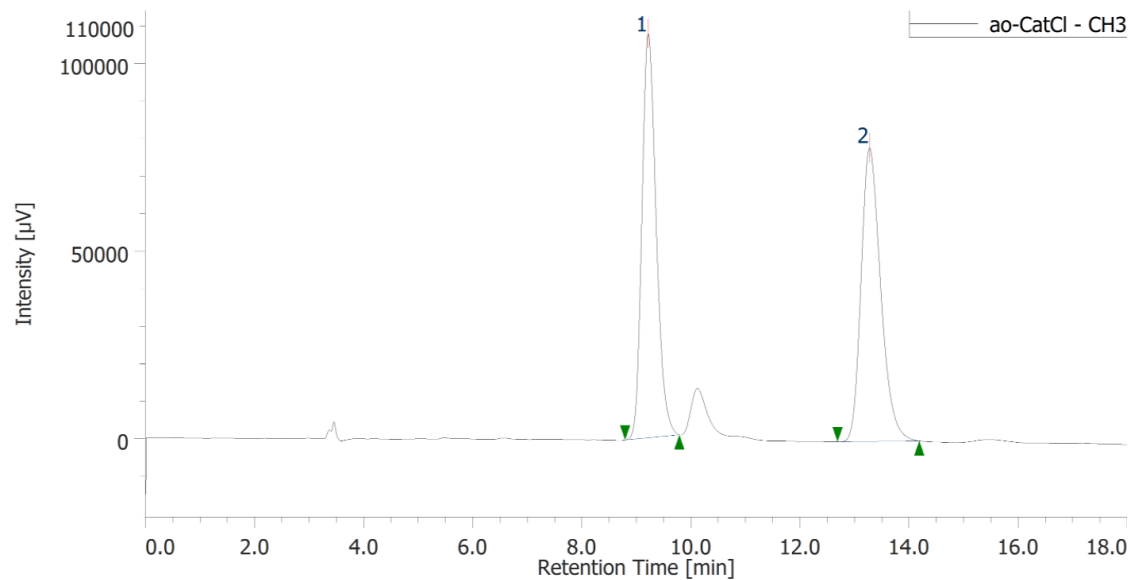

| # | ピーク名    | CH | tR [min] | 面積 [μV·sec] | 高さ [μV] | 面積%  | 高さ%  |
|---|---------|----|----------|-------------|---------|------|------|
| 1 | Unknown | 3  | 9.217    | 1951692     | 107727  | 49.9 | 57.9 |
| 2 | Unknown | 3  | 13.275   | 1957723     | 78277   | 50.1 | 42.1 |

Catalyzed by **4d**

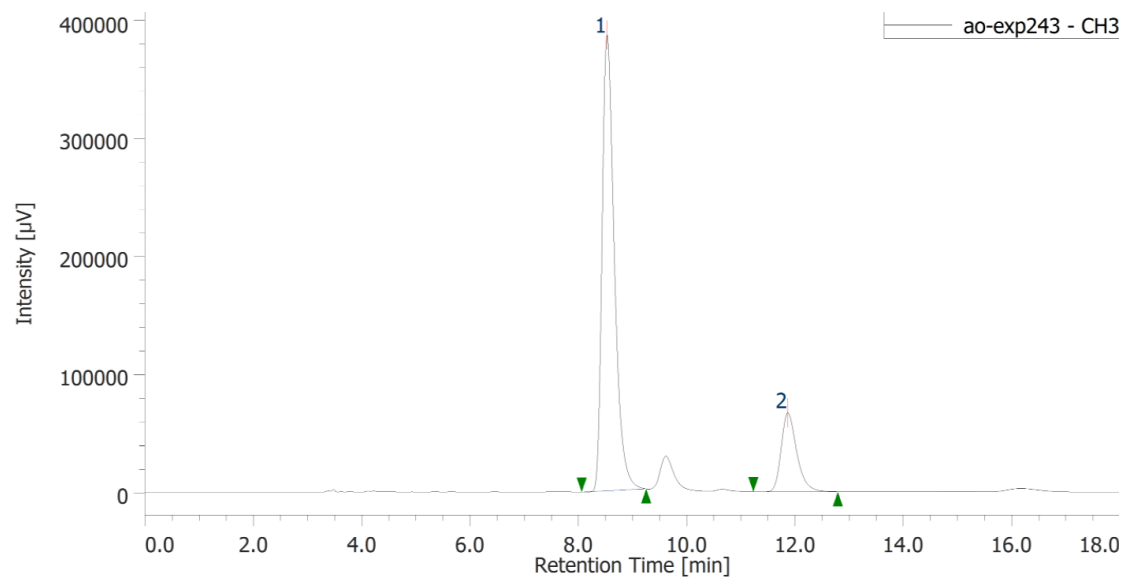

| # | ピーク名    | CH | tR [min] | 面積 [μV·sec] | 高さ [μV] | 面積%  | 高さ%  |
|---|---------|----|----------|-------------|---------|------|------|
| 1 | Unknown | 3  | 8.525    | 6083829     | 385607  | 82.1 | 85.2 |
| 2 | Unknown | 3  | 11.867   | 1330858     | 66772   | 17.9 | 14.8 |



- HPLC charts of **7a** for Table 1.

Entry 1 (toluene)

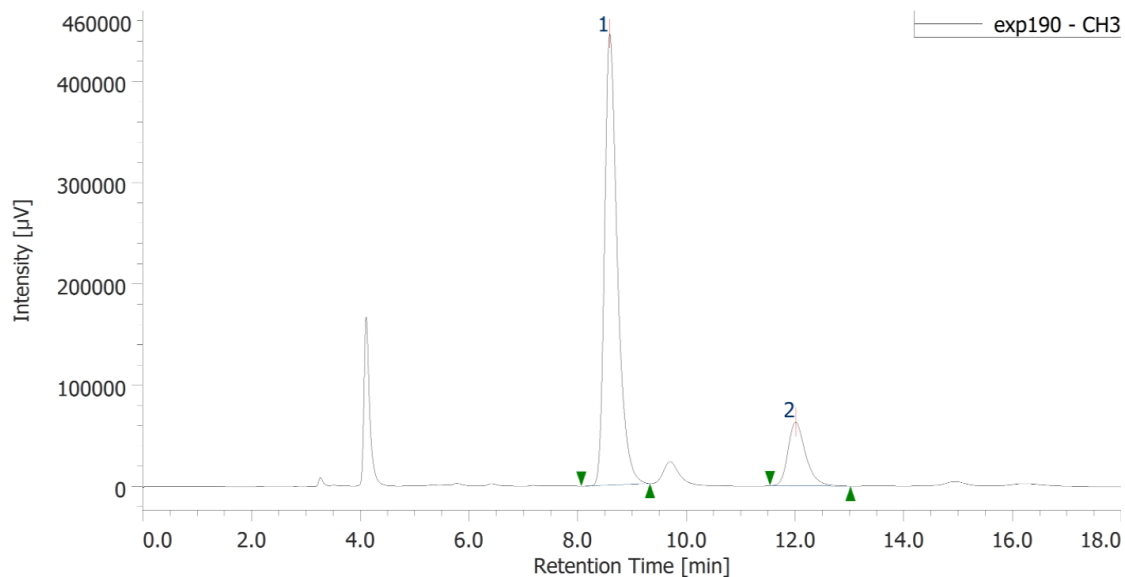

| # | ピーク名    | CH | tR [min] | Area [μV·sec] | Height [μV] | Area%  | Height% |
|---|---------|----|----------|---------------|-------------|--------|---------|
| 1 | Unknown | 3  | 8.59     | 7331298       | 445910      | 83.891 | 87.648  |
| 2 | Unknown | 3  | 12.01    | 1407809       | 62840       | 16.109 | 12.352  |

Entry 2 (THF)

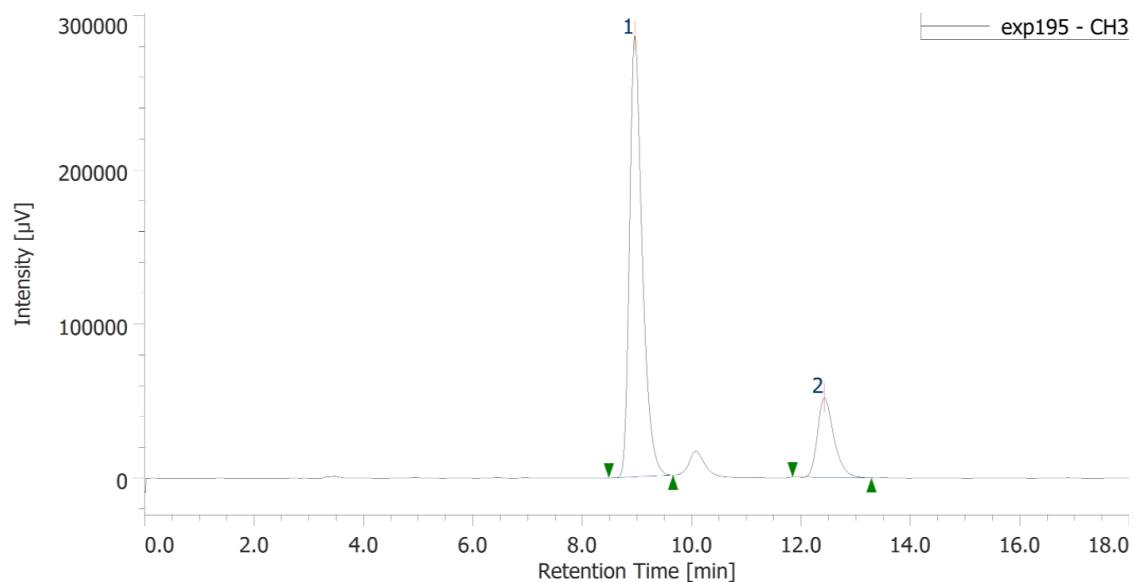

| # | ピーク名    | CH | tR [min] | Area [μV·sec] | Height [μV] | Area%  | Height% |
|---|---------|----|----------|---------------|-------------|--------|---------|
| 1 | Unknown | 3  | 8.96     | 4651974       | 286067      | 81.190 | 84.701  |
| 2 | Unknown | 3  | 12.43    | 1077770       | 51669       | 18.810 | 15.299  |

Entry 3 (CH<sub>2</sub>Cl<sub>2</sub>)

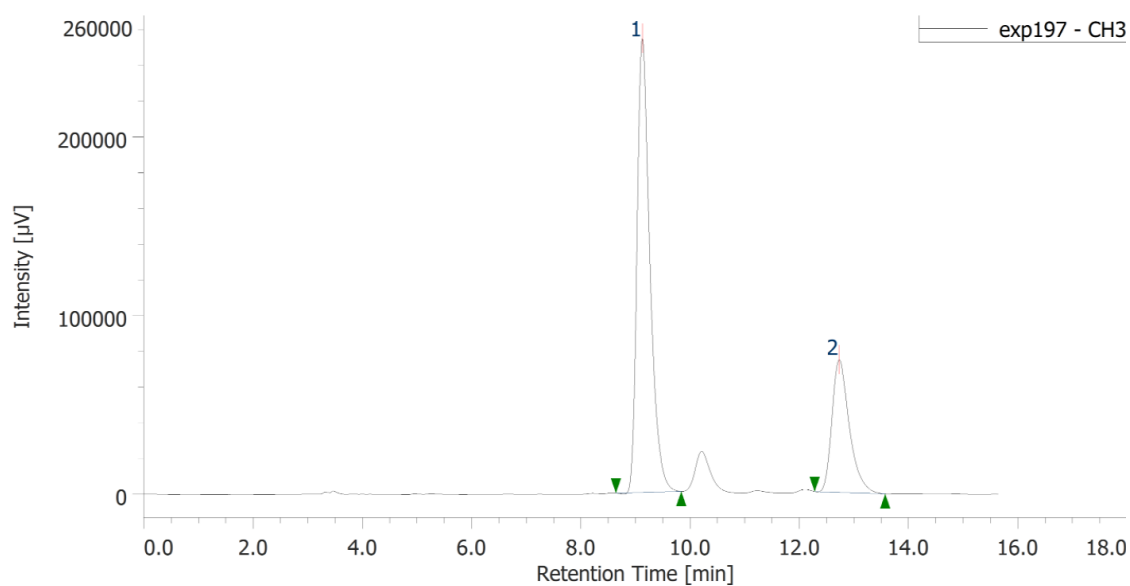

| # | ピーク名    | CH | tR [min] | Area [μV·sec] | Height [μV] | Area%  | Height% |
|---|---------|----|----------|---------------|-------------|--------|---------|
| 1 | Unknown | 3  | 9.13     | 4156467       | 254127      | 71.672 | 77.397  |
| 2 | Unknown | 3  | 12.72    | 1642800       | 74217       | 28.328 | 22.603  |

Entry 4 (Et<sub>2</sub>O)

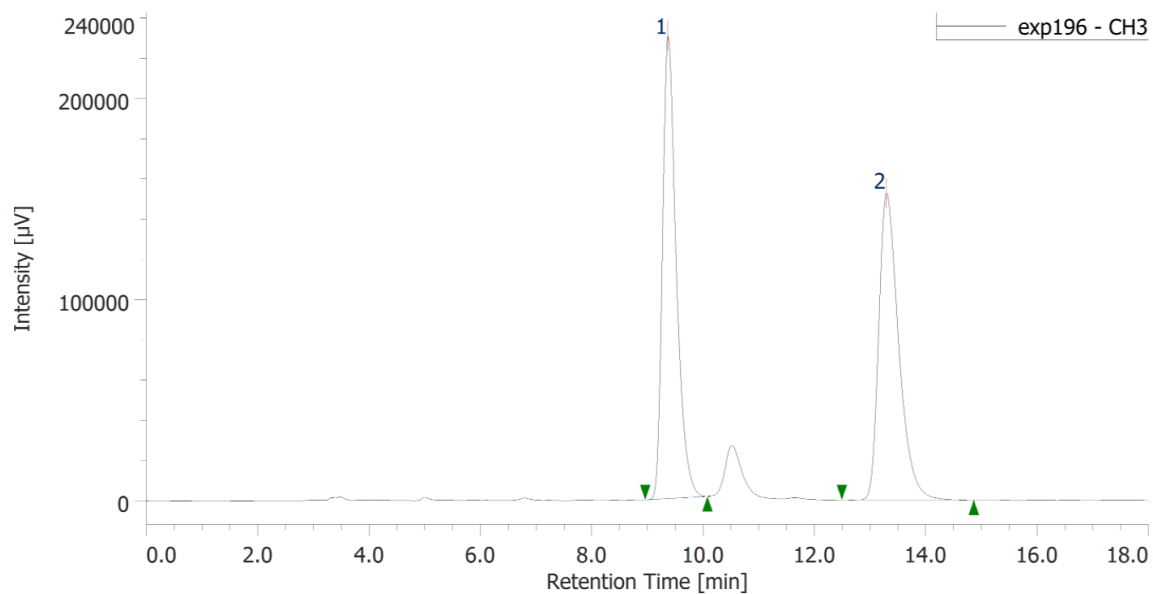

| # | ピーク名    | CH | tR [min] | Area [μV·sec] | Height [μV] | Area%  | Height% |
|---|---------|----|----------|---------------|-------------|--------|---------|
| 1 | Unknown | 3  | 9.37     | 3953222       | 229910      | 51.082 | 60.151  |
| 2 | Unknown | 3  | 13.29    | 3785806       | 152310      | 48.918 | 39.849  |

Entry 5 (CH<sub>3</sub>CN)

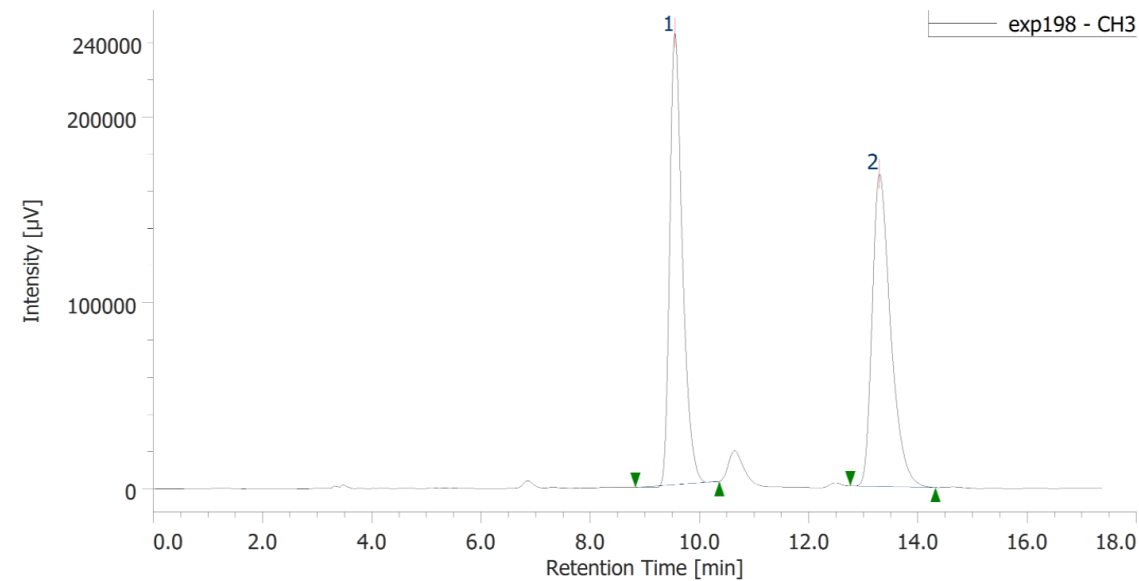

| # | ピーク名    | CH | tR [min] | Area [μV·sec] | Height [μV] | Area%  | Height% |
|---|---------|----|----------|---------------|-------------|--------|---------|
| 1 | Unknown | 3  | 9.55     | 3911439       | 242861      | 49.715 | 59.100  |
| 2 | Unknown | 3  | 13.29    | 3956320       | 168069      | 50.285 | 40.900  |

Entry 6 (-10 °C)

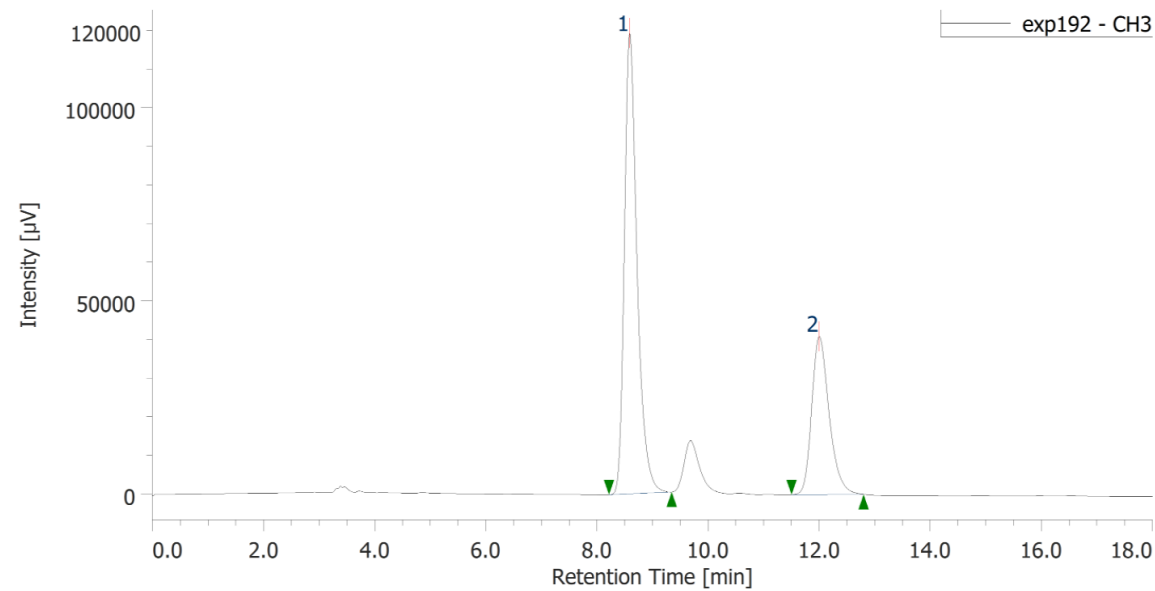

| # | ピーク名    | CH | tR [min] | Area [μV·sec] | Height [μV] | Area%  | Height% |
|---|---------|----|----------|---------------|-------------|--------|---------|
| 1 | Unknown | 3  | 8.59     | 1891690       | 119256      | 67.951 | 74.441  |
| 2 | Unknown | 3  | 12.00    | 892200        | 40946       | 32.049 | 25.559  |

Entry 7 (-30 °C)

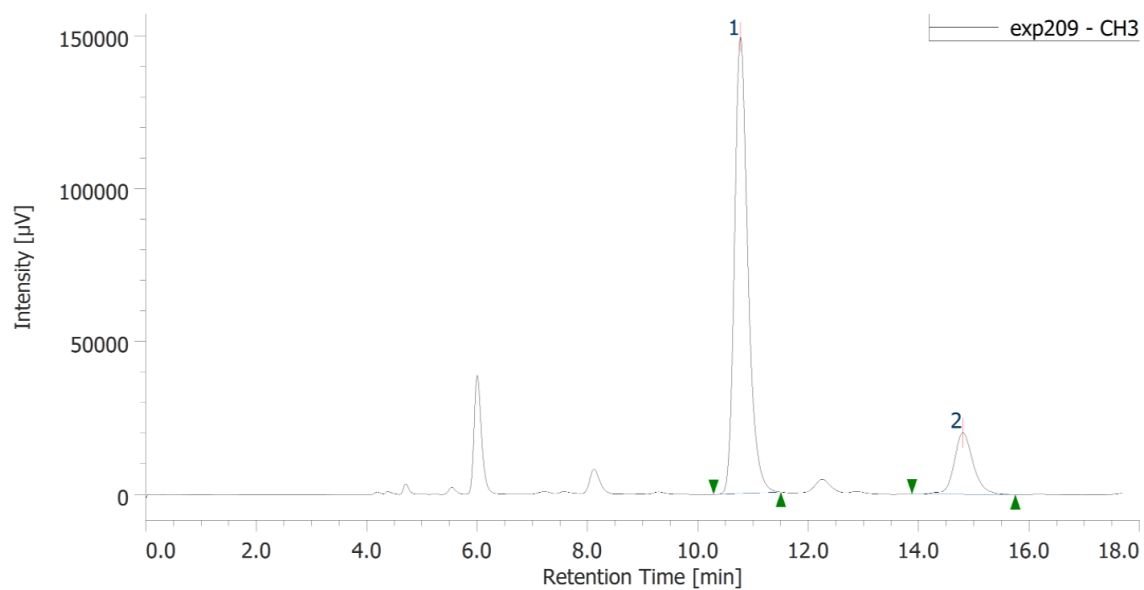

| # | ピーク名    | CH | tR [min] | Area [μV·sec] | Height [μV] | Area%  | Height% |
|---|---------|----|----------|---------------|-------------|--------|---------|
| 1 | Unknown | 3  | 10.77    | 2518823       | 149219      | 84.010 | 88.122  |
| 2 | Unknown | 3  | 14.80    | 479416        | 20113       | 15.990 | 11.878  |

Entry 8 (catalyzed by 1 mol% of **4a**)

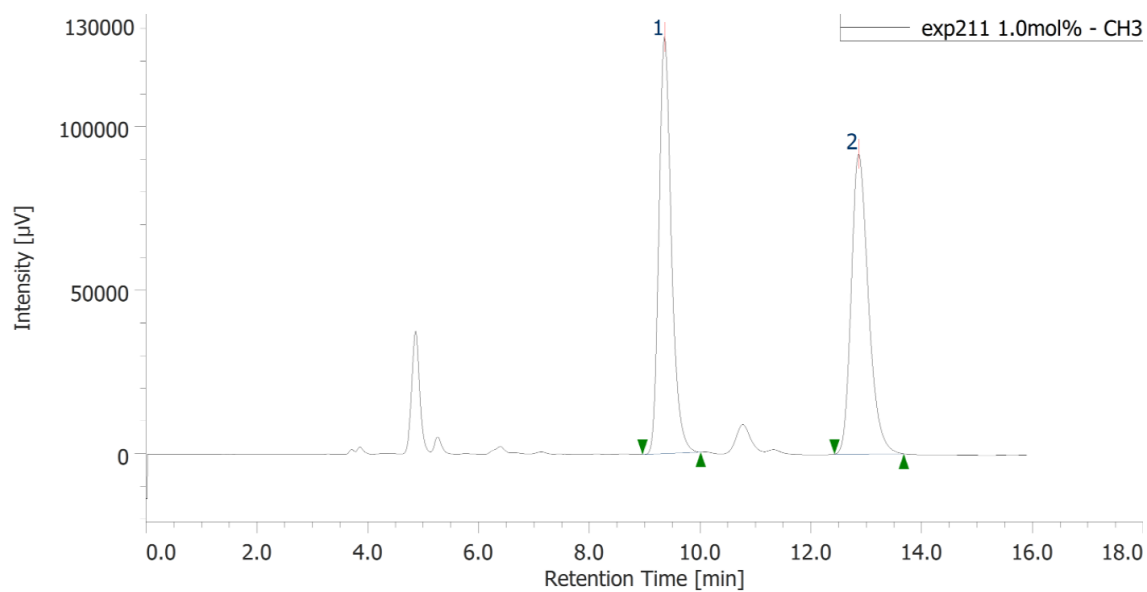

| # | ピーク名    | CH | tR [min] | Area [μV·sec] | Height [μV] | Area%  | Height% |
|---|---------|----|----------|---------------|-------------|--------|---------|
| 1 | Unknown | 3  | 9.36     | 1995053       | 127209      | 50.220 | 58.117  |
| 2 | Unknown | 3  | 12.86    | 1977560       | 91677       | 49.780 | 41.883  |

Entry 9 (catalyzed by 5 mol% of **4a**)

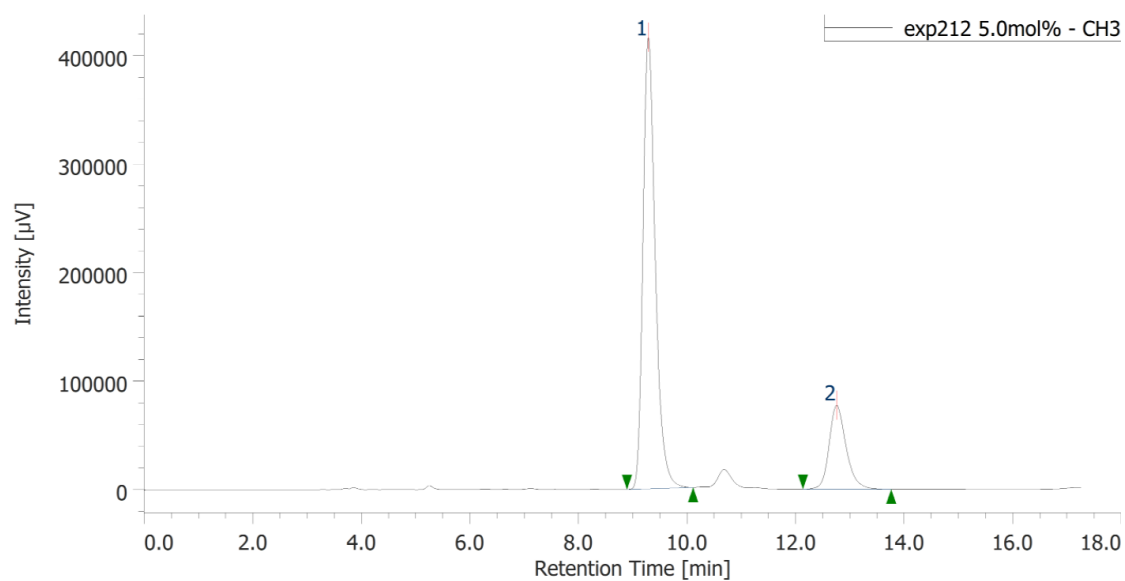

| # | ピーク名    | CH | tR [min] | Area [μV·sec] | Height [μV] | Area%  | Height% |
|---|---------|----|----------|---------------|-------------|--------|---------|
| 1 | Unknown | 3  | 9.28     | 6530331       | 415943      | 79.512 | 84.328  |
| 2 | Unknown | 3  | 12.75    | 1682690       | 77299       | 20.488 | 15.672  |

Entry 10 (no catalyst)

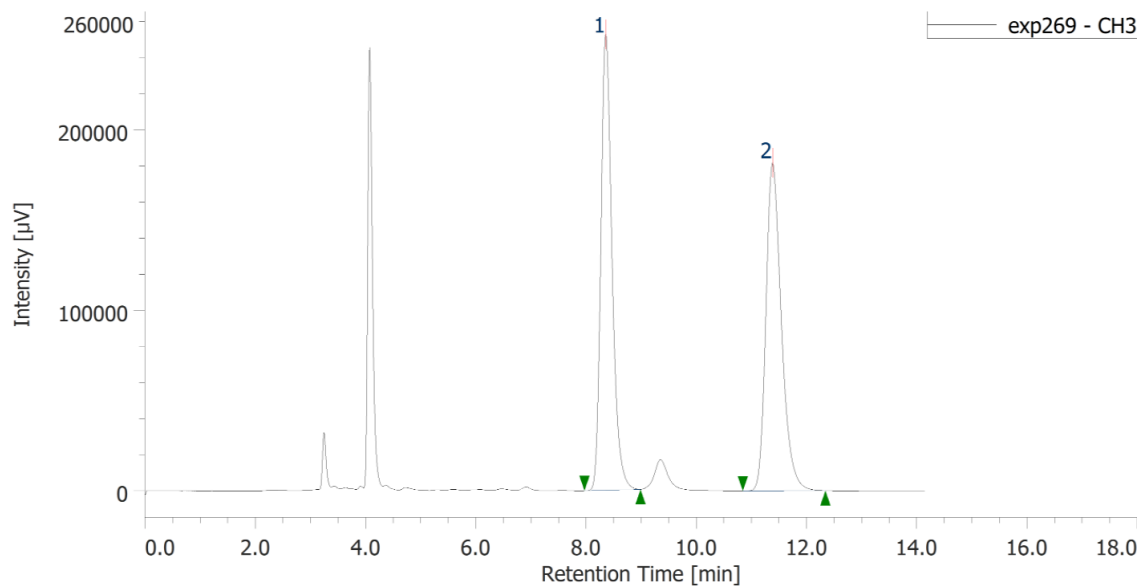

| # | ピーク名    | CH | tR [min] | Area [μV·sec] | Height [μV] | Area%  | Height% |
|---|---------|----|----------|---------------|-------------|--------|---------|
| 1 | Unknown | 3  | 8.36     | 3540468       | 252506      | 49.938 | 58.152  |
| 2 | Unknown | 3  | 11.38    | 3549256       | 181714      | 50.062 | 41.848  |

Chemical structure of **7a** is shown above the spectrum.

<sup>1</sup>H NMR spectrum (CDCl<sub>3</sub>) of compound **7a**. The x-axis represents chemical shift (δ) in ppm, ranging from 0 to 8. The y-axis represents intensity. Integration values are provided for several peaks.

Chemical shifts (δ) and integration values (from left to right):

- 7.428, 7.424, 7.421, 7.406, 7.378, 7.376, 7.360, 7.357, 7.343, 7.347, 7.342, 7.339, 7.325, 7.314, 7.310, 7.284, 7.280, 7.277, 7.268, 7.261, 7.254, 7.247, 7.244, 7.236, 7.204, 7.187, 7.181, 7.168, 7.165, 7.008, 7.006, 6.990, 6.987, 6.983, 6.968, 6.715, 6.695, 6.423, 5.026, 4.987, 4.886, 4.884, 3.695, 3.686, 1.306, 0.000
- Integration values: 3.07, 3.05, 1.09, 0.99, 1.00, 0.99, 0.95, 4.03, 0.98, 0.97, 8.96

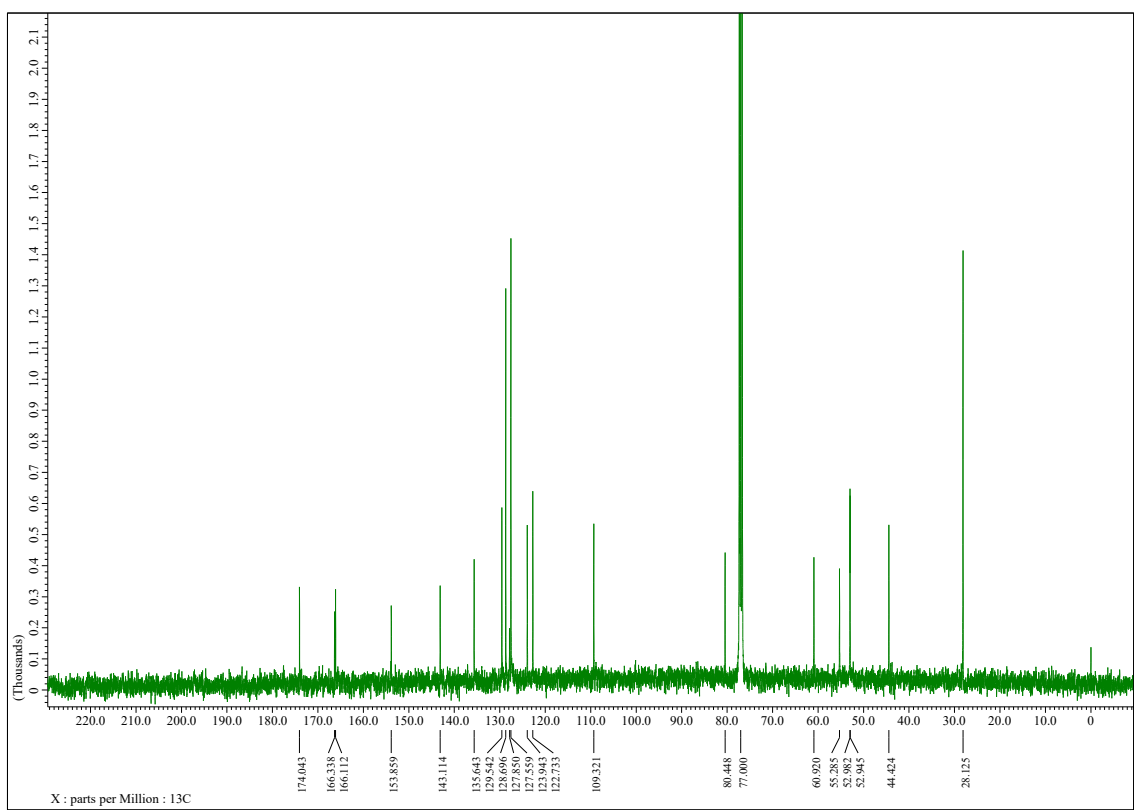

Racemic sample of **7a**

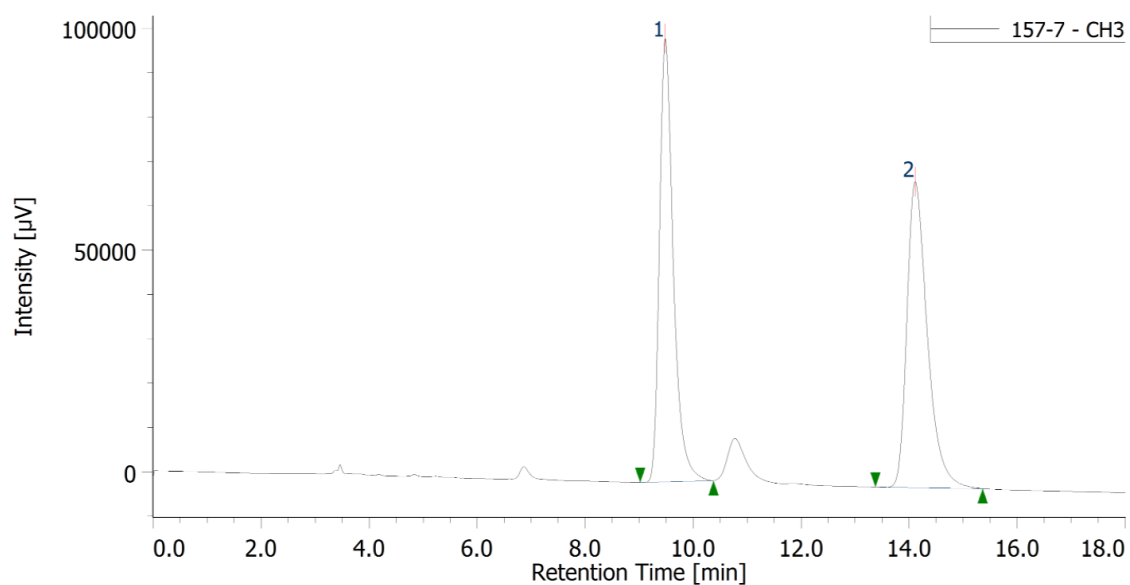

| # | ピーク名    | CH | tR [min] | Area [μV·sec] | Height [μV] | Area%  | Height% |
|---|---------|----|----------|---------------|-------------|--------|---------|
| 1 | Unknown | 3  | 9.48     | 1775891       | 99921       | 49.539 | 59.170  |
| 2 | Unknown | 3  | 14.11    | 1808946       | 68951       | 50.461 | 40.830  |

**7a** catalyzed by **4a**

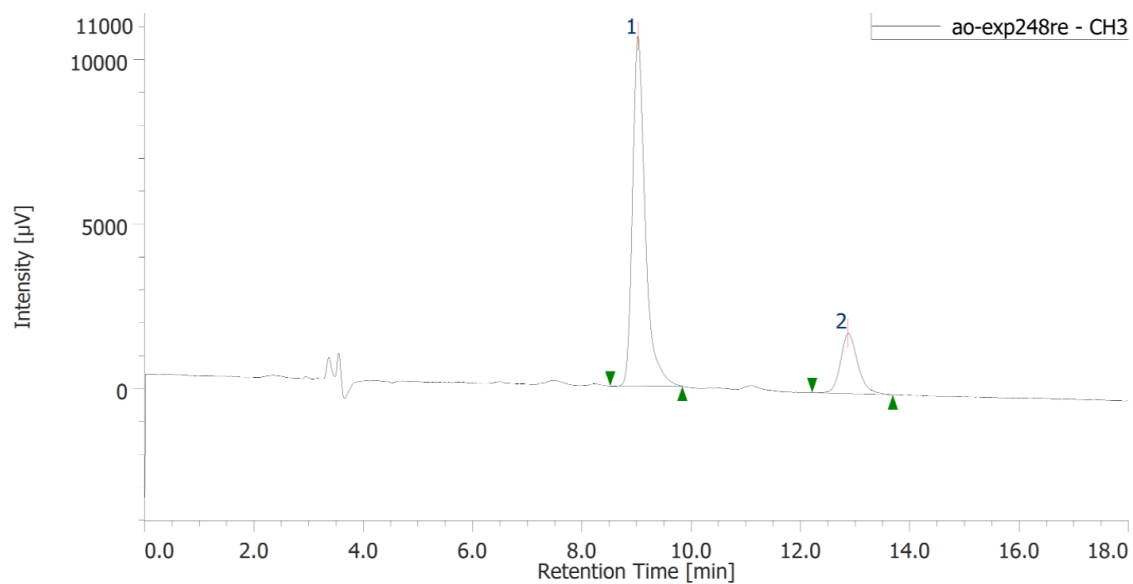

| # | ピーク名    | CH | tR [min] | 面積 [μV·sec] | 高さ [μV] | 面積%  | 高さ%  |
|---|---------|----|----------|-------------|---------|------|------|
| 1 | Unknown | 3  | 9.025    | 172319      | 10641   | 81.1 | 85.3 |
| 2 | Unknown | 3  | 12.867   | 40037       | 1829    | 18.9 | 14.7 |

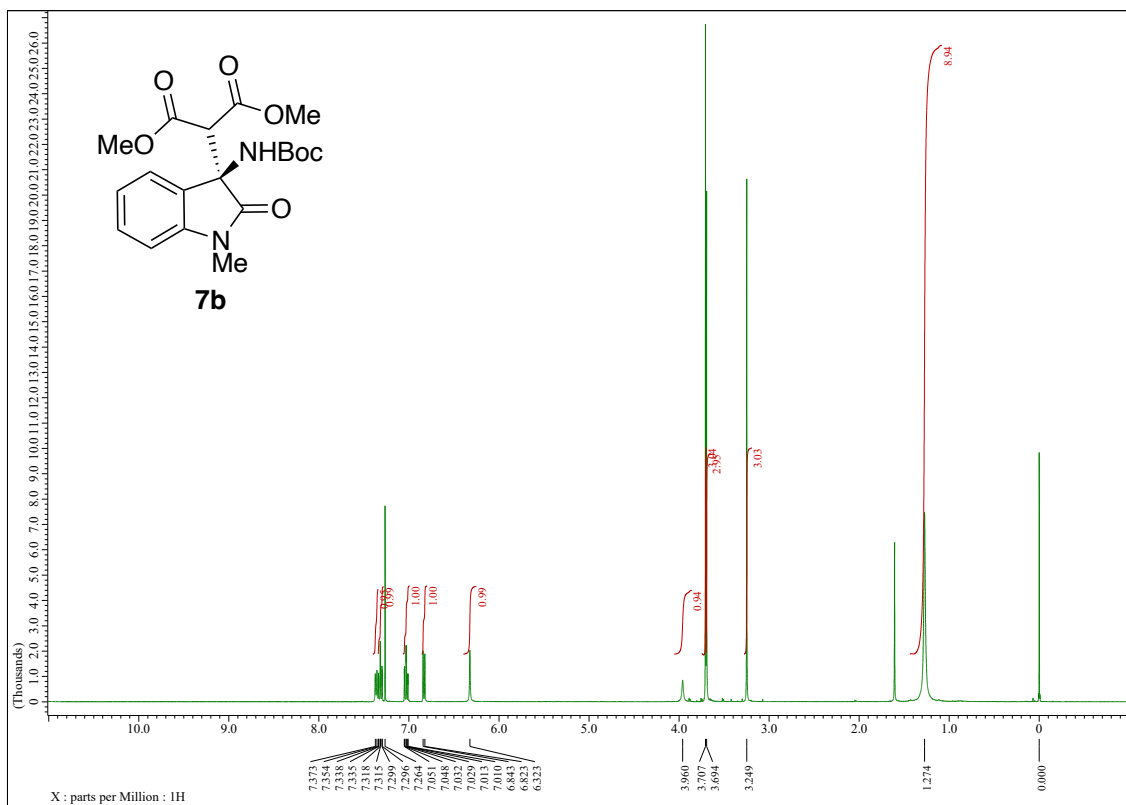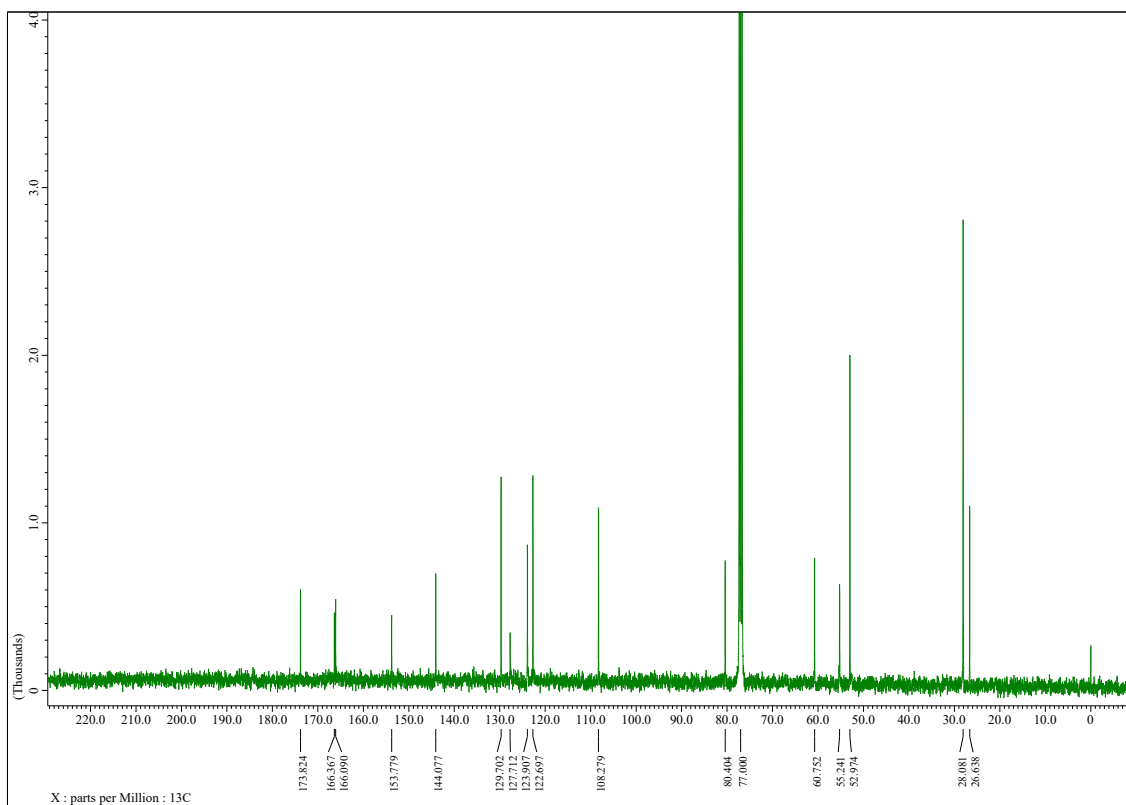



Racemic sample of **7b**

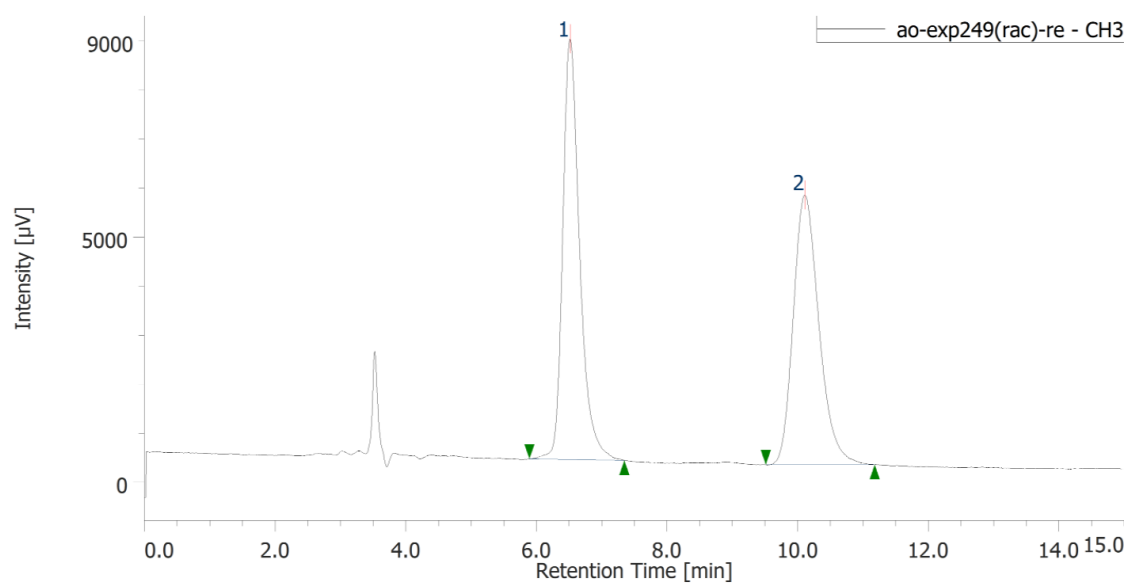

| # | ピーク名    | CH | tR [min] | 面積 [μV·sec] | 高さ [μV] | 面積%  | 高さ%  |
|---|---------|----|----------|-------------|---------|------|------|
| 1 | Unknown | 3  | 6.517    | 154628      | 8579    | 50.8 | 60.9 |
| 2 | Unknown | 3  | 10.108   | 150023      | 5500    | 49.2 | 39.1 |

**7b** catalyzed by **4a**

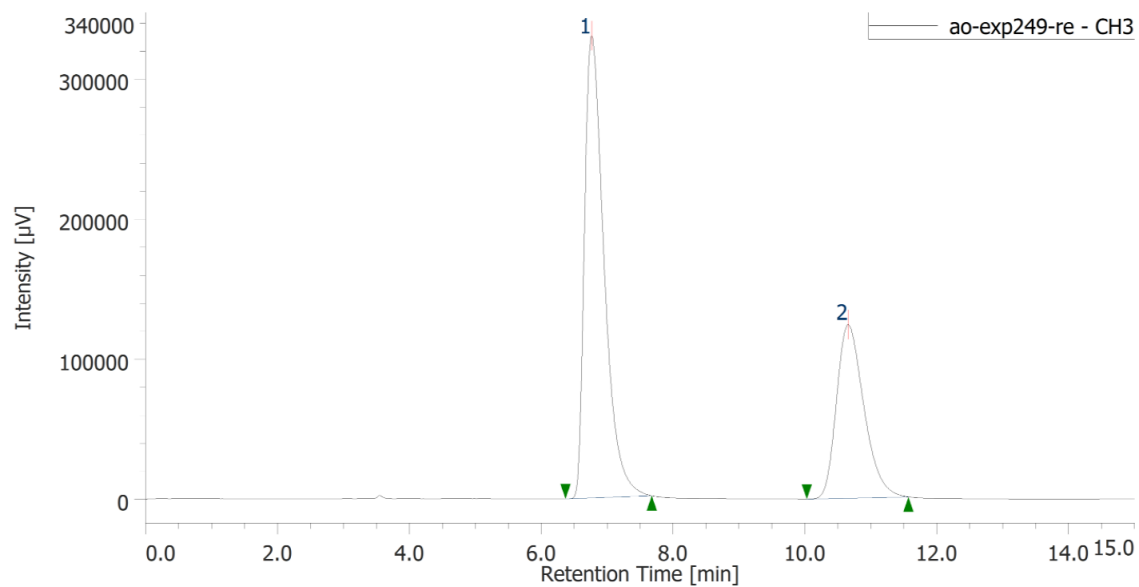

| # | ピーク名    | CH | tR [min] | 面積 [μV·sec] | 高さ [μV] | 面積%  | 高さ%  |
|---|---------|----|----------|-------------|---------|------|------|
| 1 | Unknown | 3  | 6.767    | 6798246     | 329619  | 65.6 | 72.7 |
| 2 | Unknown | 3  | 10.658   | 3564843     | 123669  | 34.4 | 27.3 |

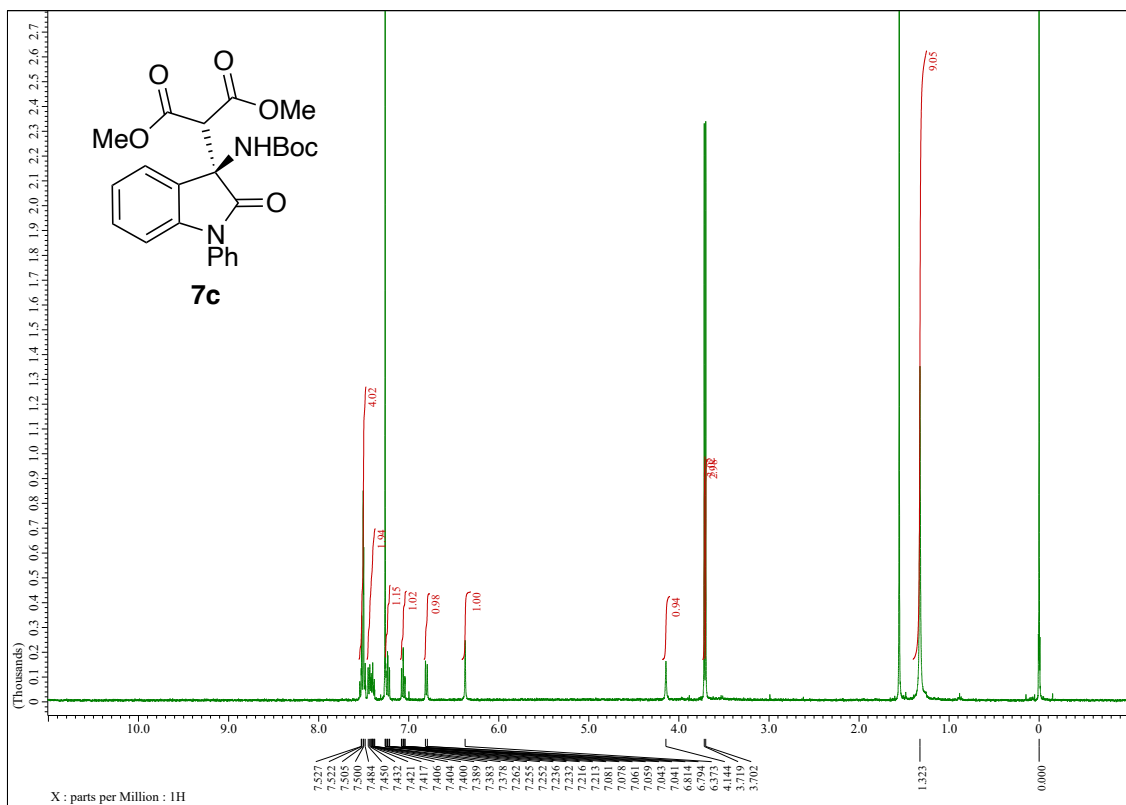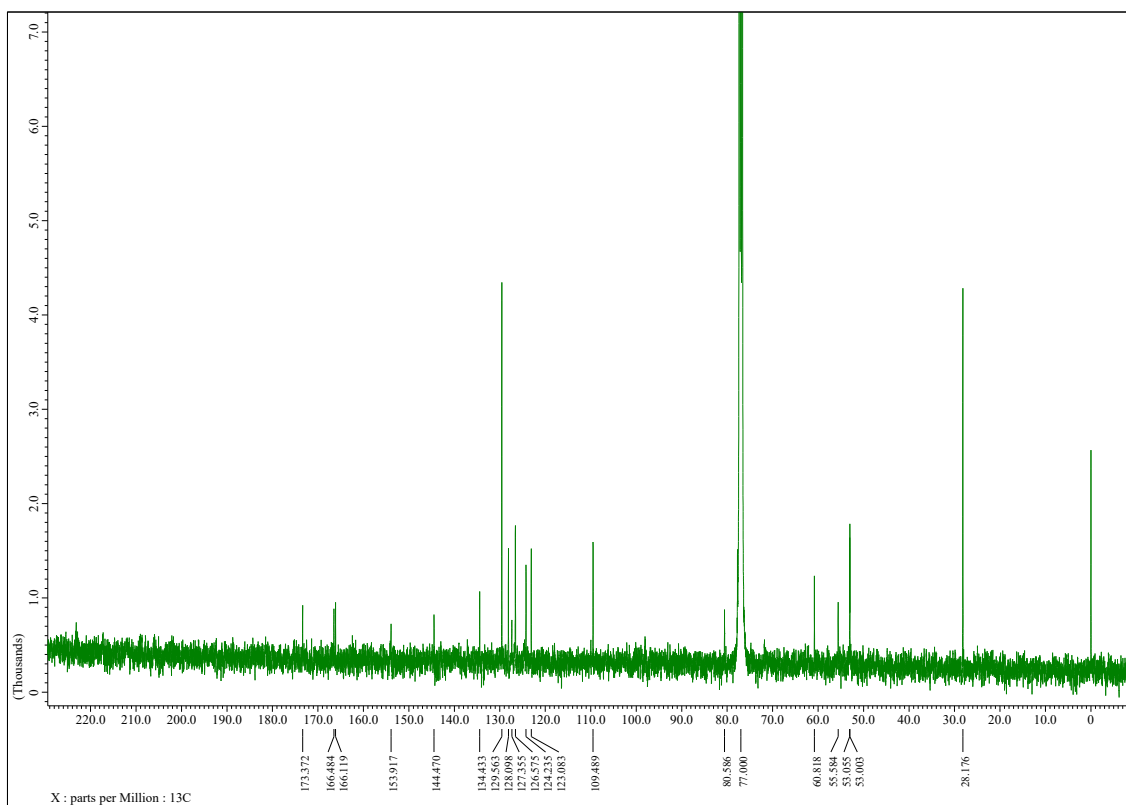

Racemic sample of **7c**

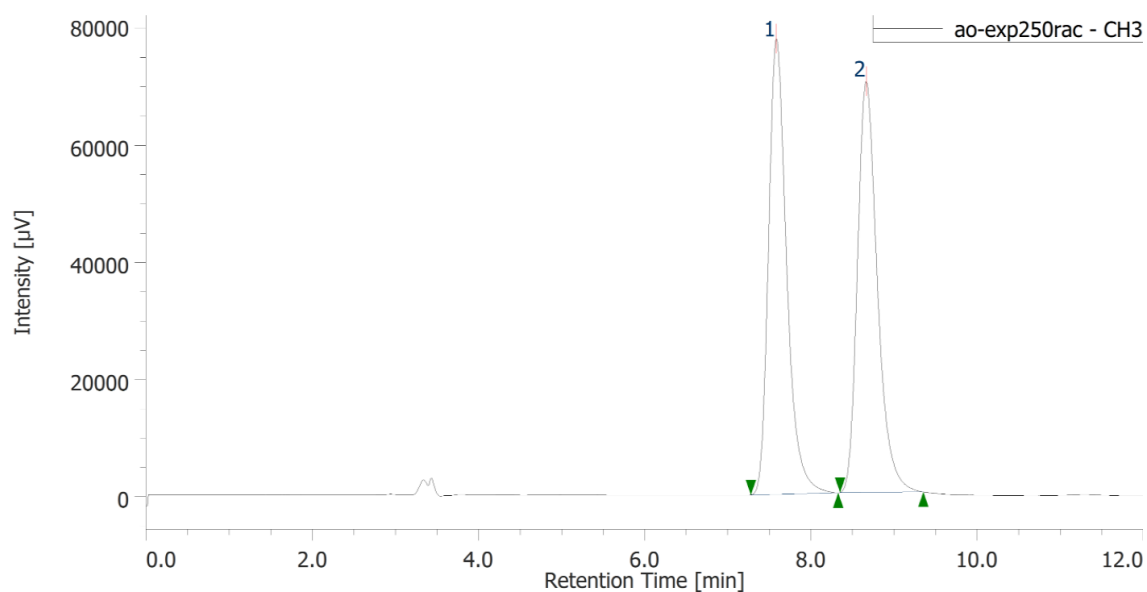

| # | ピーク名    | CH | tR [min] | 面積 [μV·sec] | 高さ [μV] | 面積%  | 高さ%  |
|---|---------|----|----------|-------------|---------|------|------|
| 1 | Unknown | 3  | 7.583    | 1178795     | 77792   | 50.3 | 52.6 |
| 2 | Unknown | 3  | 8.667    | 1166613     | 70149   | 49.7 | 47.4 |

**7c** catalyzed by **4a**

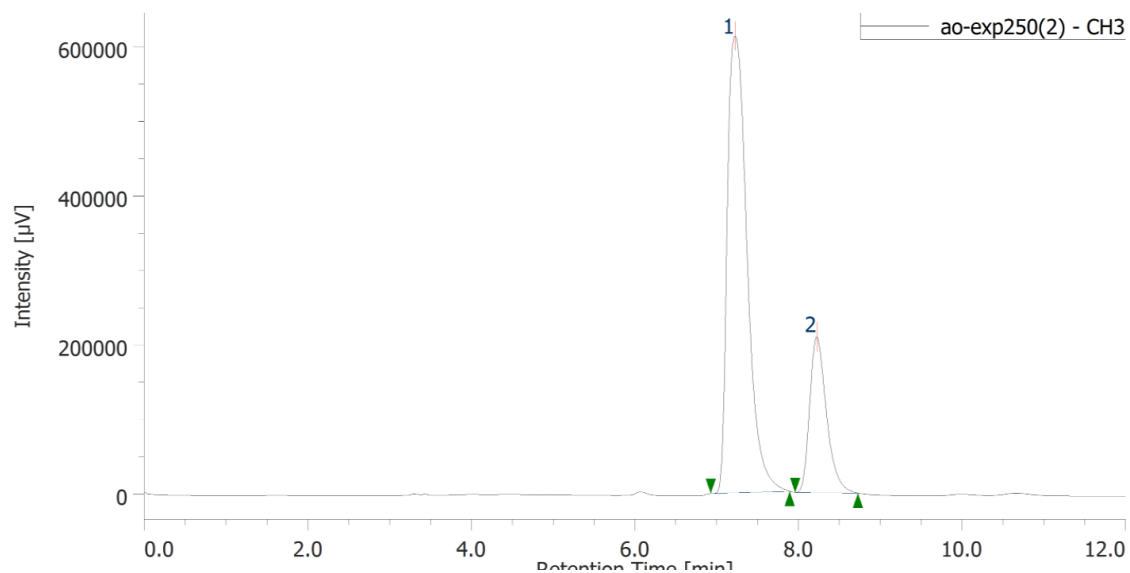

| # | ピーク名    | CH | tR [min] | 面積 [μV·sec] | 高さ [μV] | 面積%  | 高さ%  |
|---|---------|----|----------|-------------|---------|------|------|
| 1 | Unknown | 3  | 7.225    | 10291138    | 612648  | 77.5 | 74.6 |
| 2 | Unknown | 3  | 8.225    | 2987784     | 208907  | 22.5 | 25.4 |

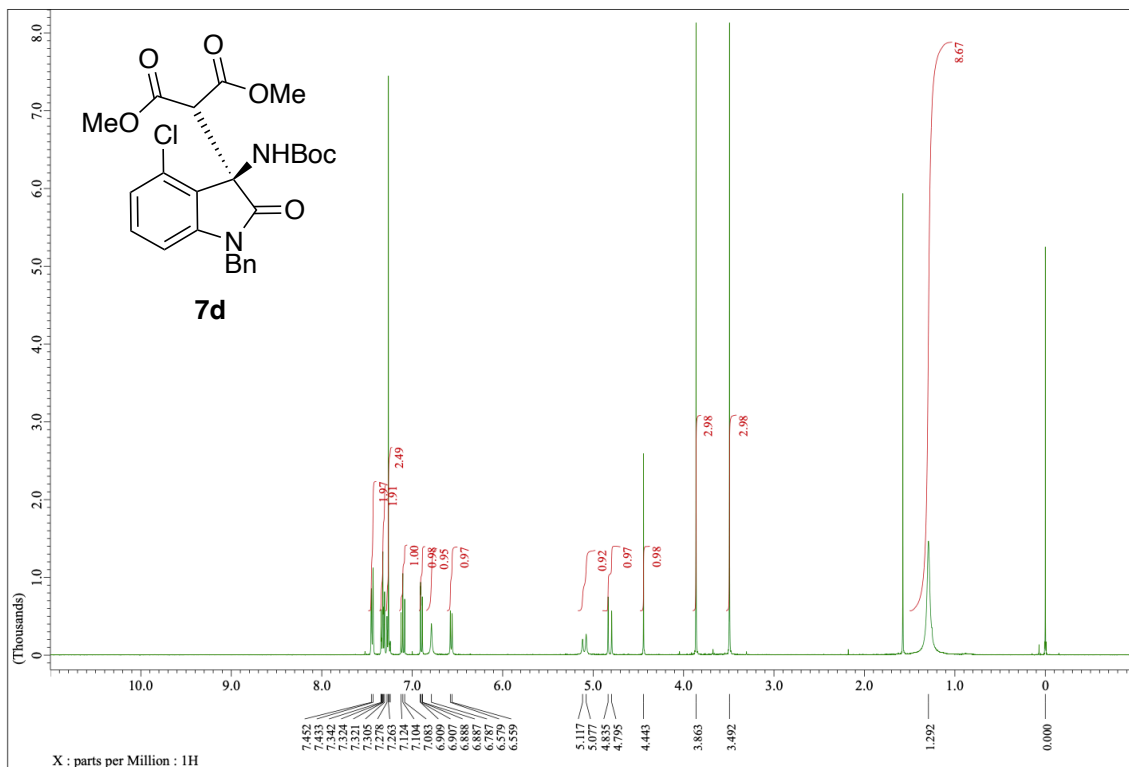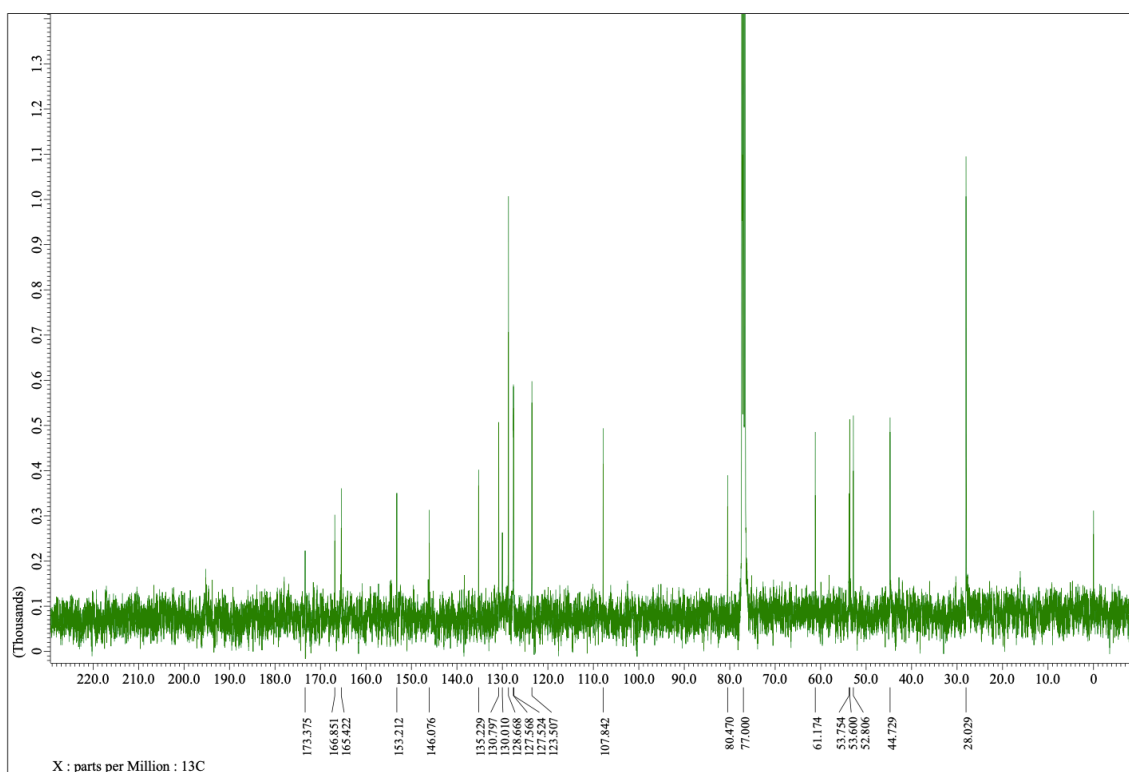

Racemic sample of **7d**

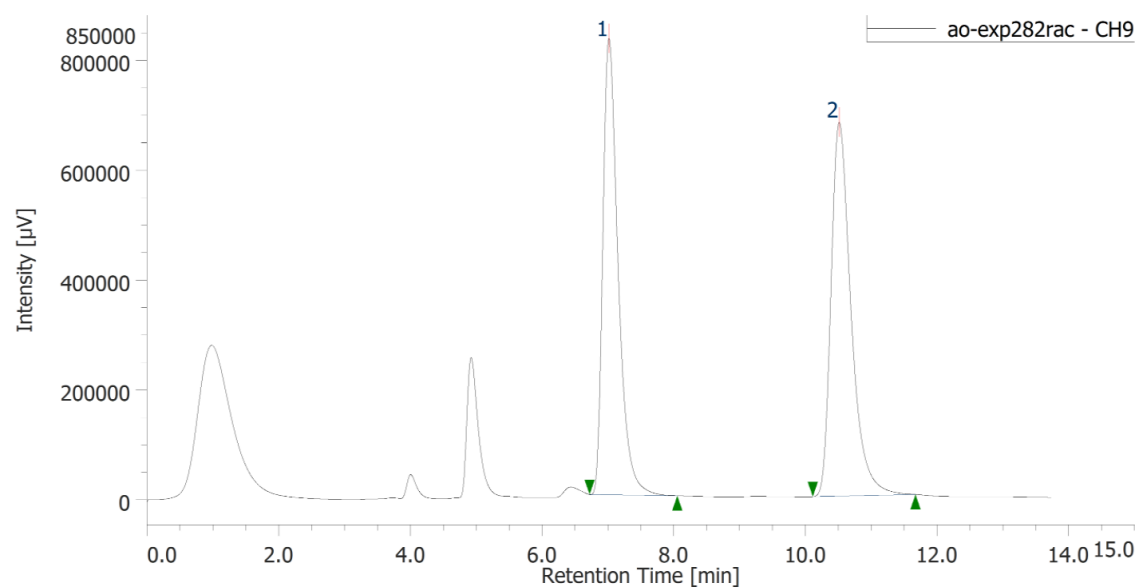

| # | ピーク名    | CH | tR [min] | 面積 [μV·sec] | 高さ [μV] | 面積%  | 高さ%  |
|---|---------|----|----------|-------------|---------|------|------|
| 1 | Unknown | 9  | 7.013    | 13387672    | 830499  | 48.2 | 55.0 |
| 2 | Unknown | 9  | 10.512   | 14376635    | 680124  | 51.8 | 45.0 |

**7d** catalyzed by **4a**

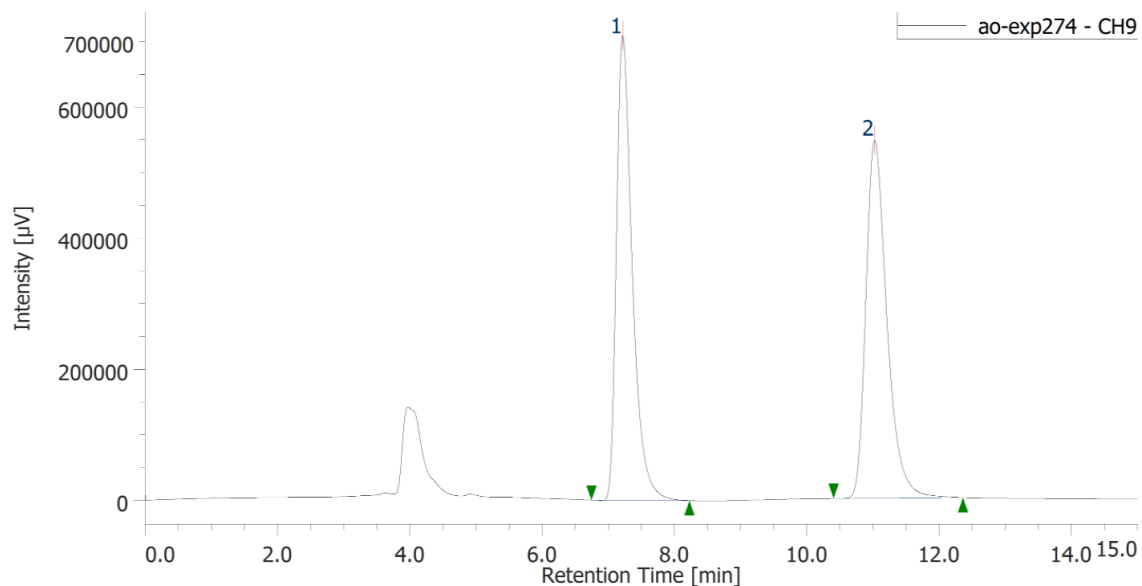

| # | ピーク名    | CH | tR [min] | 面積 [μV·sec] | 高さ [μV] | 面積%  | 高さ%  |
|---|---------|----|----------|-------------|---------|------|------|
| 1 | Unknown | 9  | 7.217    | 11804115    | 708841  | 49.4 | 56.5 |
| 2 | Unknown | 9  | 11.025   | 12071694    | 545843  | 50.6 | 43.5 |

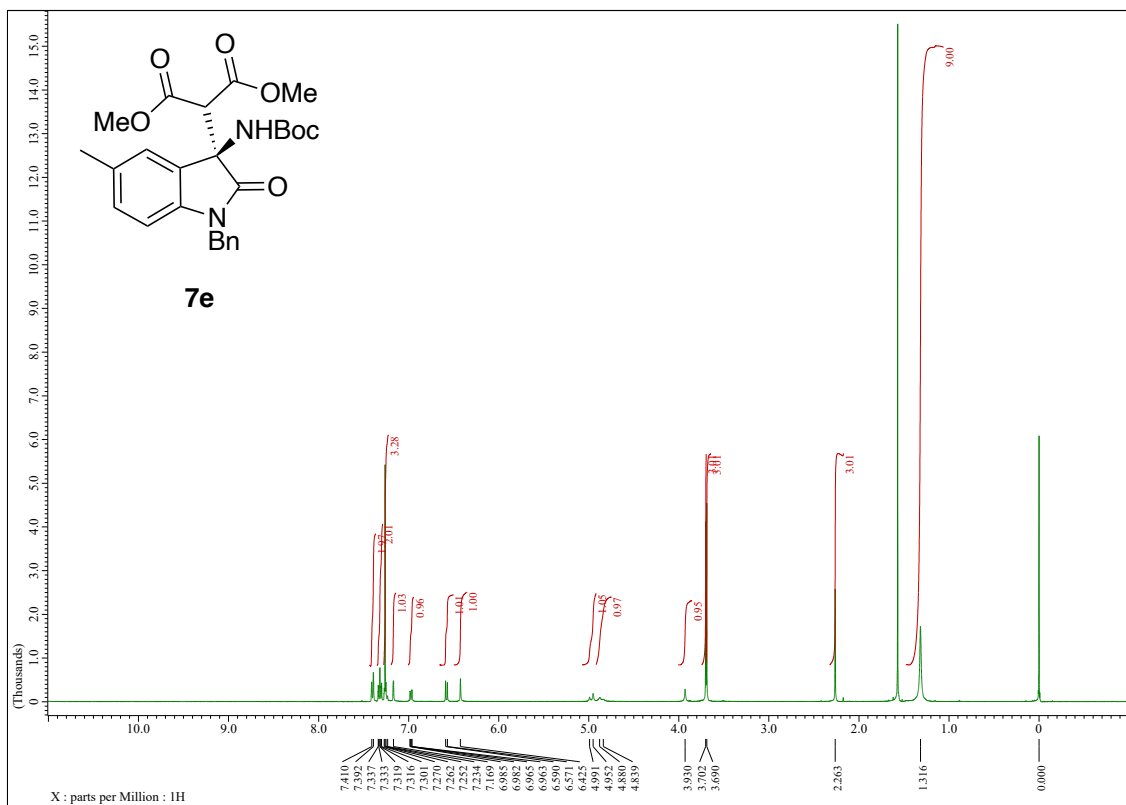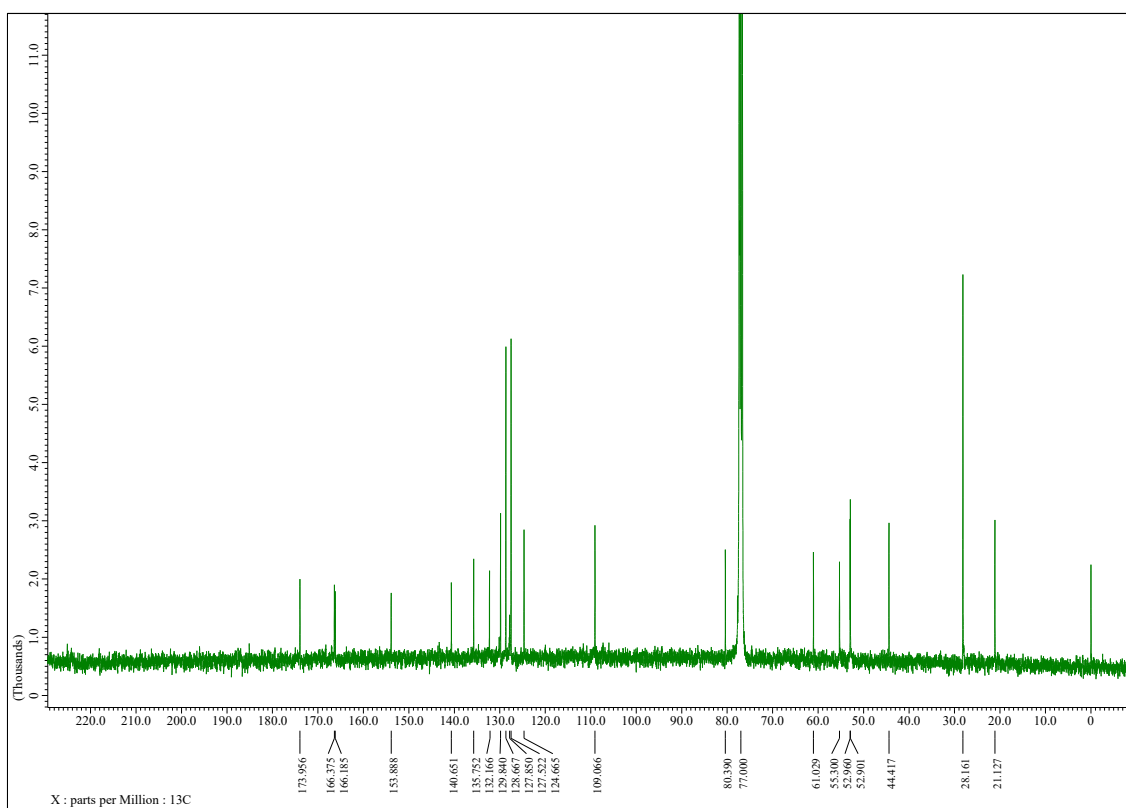

Racemic sample of **7e**

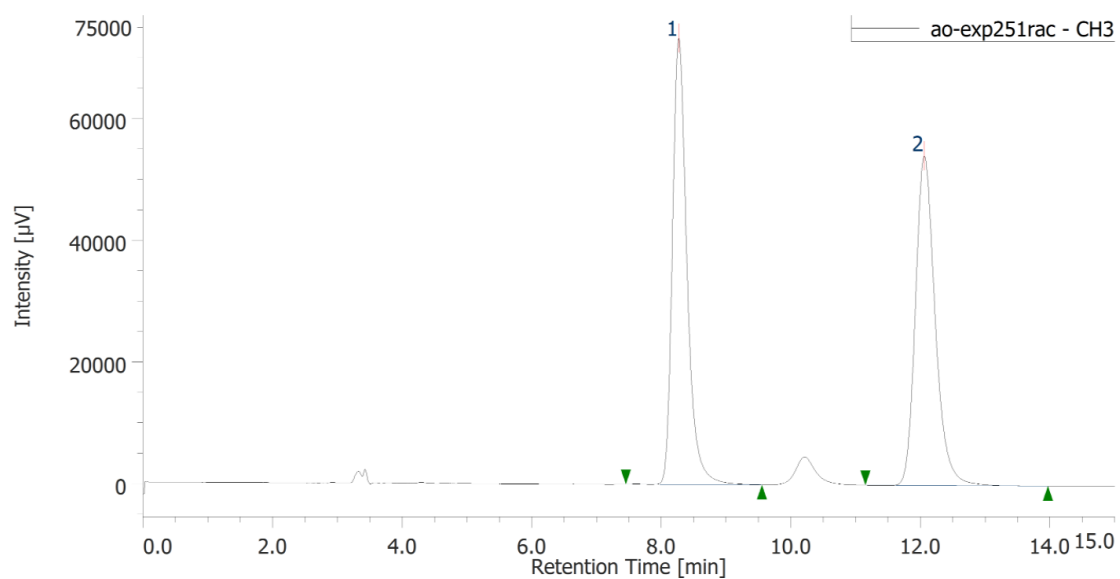

| # | ピーク名    | CH | tR [min] | 面積 [μV·sec] | 高さ [μV] | 面積%  | 高さ%  |
|---|---------|----|----------|-------------|---------|------|------|
| 1 | Unknown | 3  | 8.267    | 1141384     | 73322   | 49.9 | 57.5 |
| 2 | Unknown | 3  | 12.058   | 1146791     | 54163   | 50.1 | 42.5 |

**7e** catalyzed by **4a**

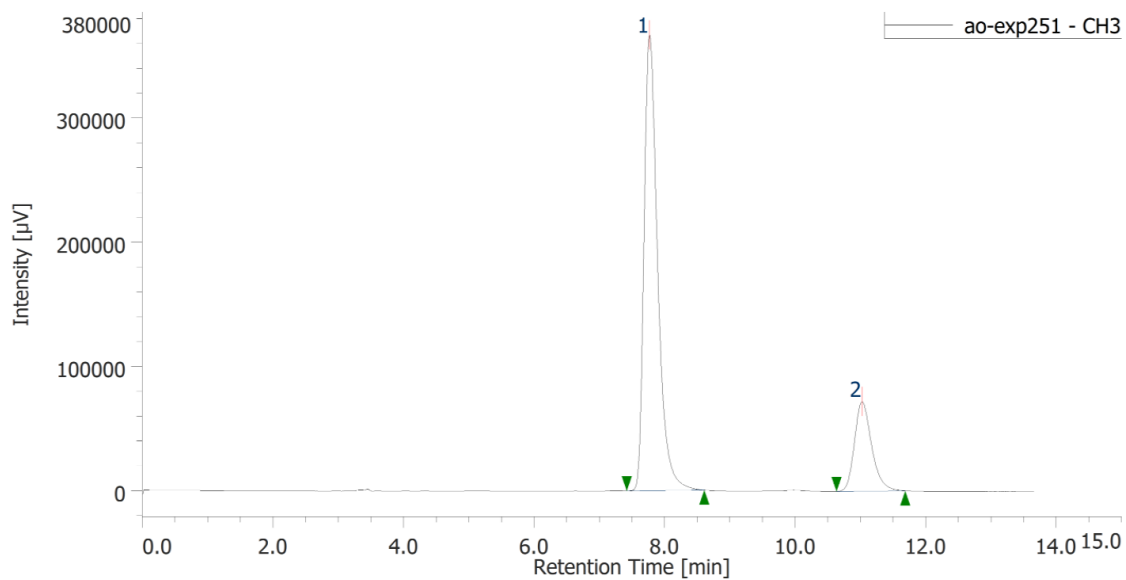

| # | ピーク名    | CH | tR [min] | 面積 [μV·sec] | 高さ [μV] | 面積%  | 高さ%  |
|---|---------|----|----------|-------------|---------|------|------|
| 1 | Unknown | 3  | 7.767    | 5311506     | 366736  | 80.2 | 83.6 |
| 2 | Unknown | 3  | 11.025   | 1311860     | 72001   | 19.8 | 16.4 |

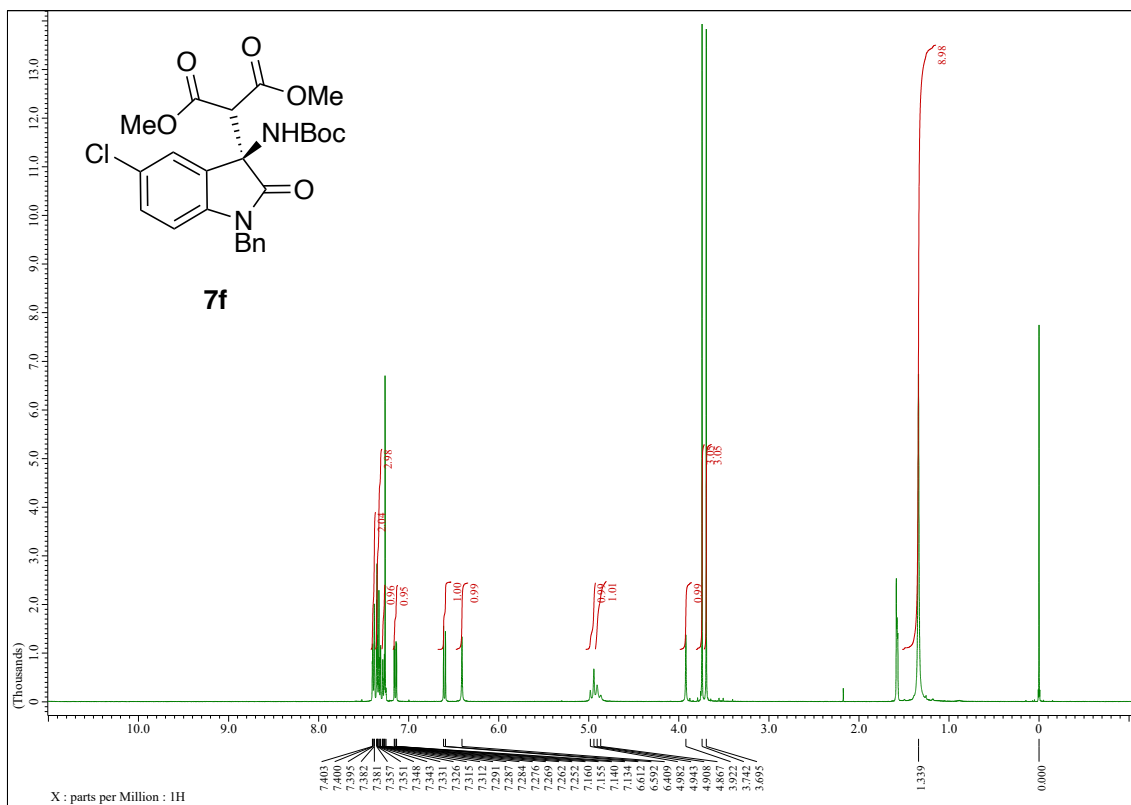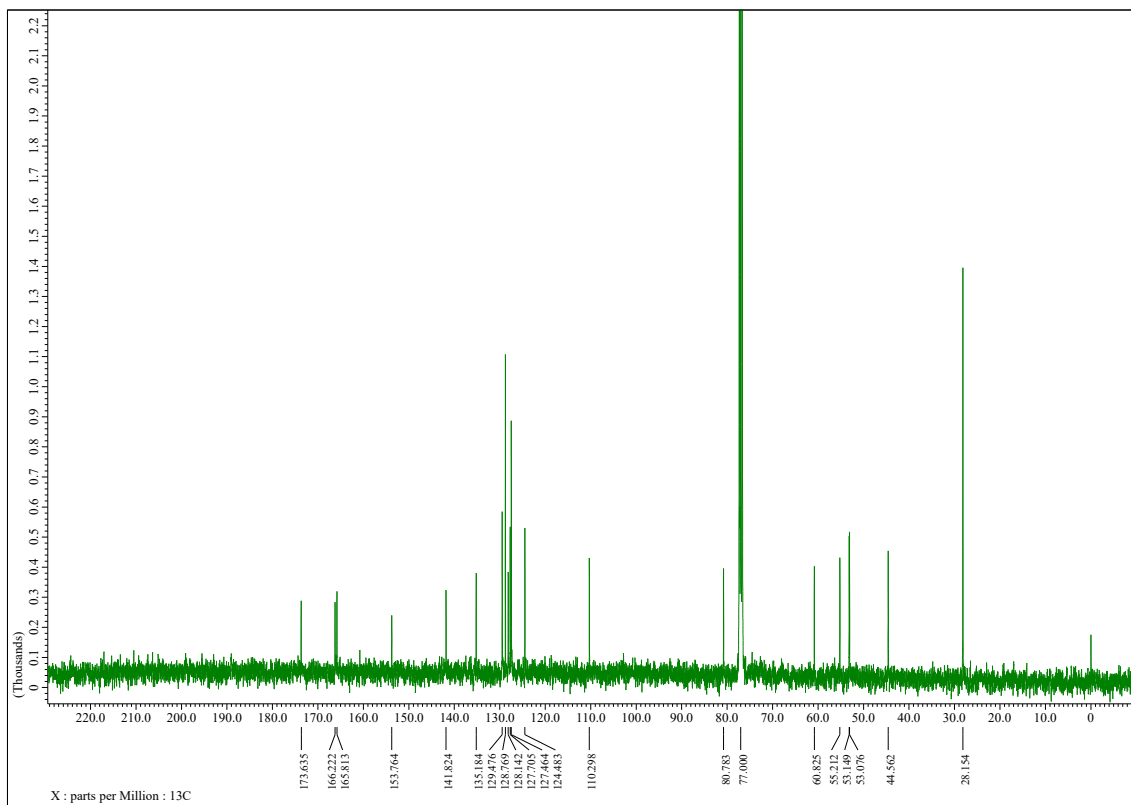



Racemic sample of **7f**

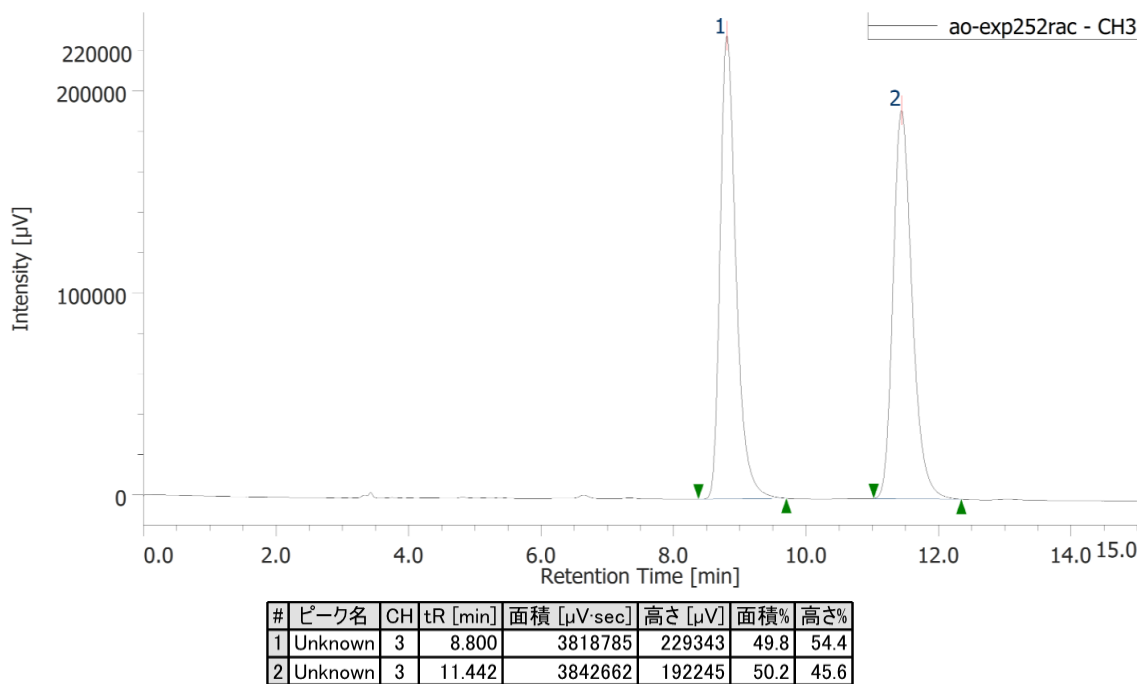

**7f** catalyzed by **4a**

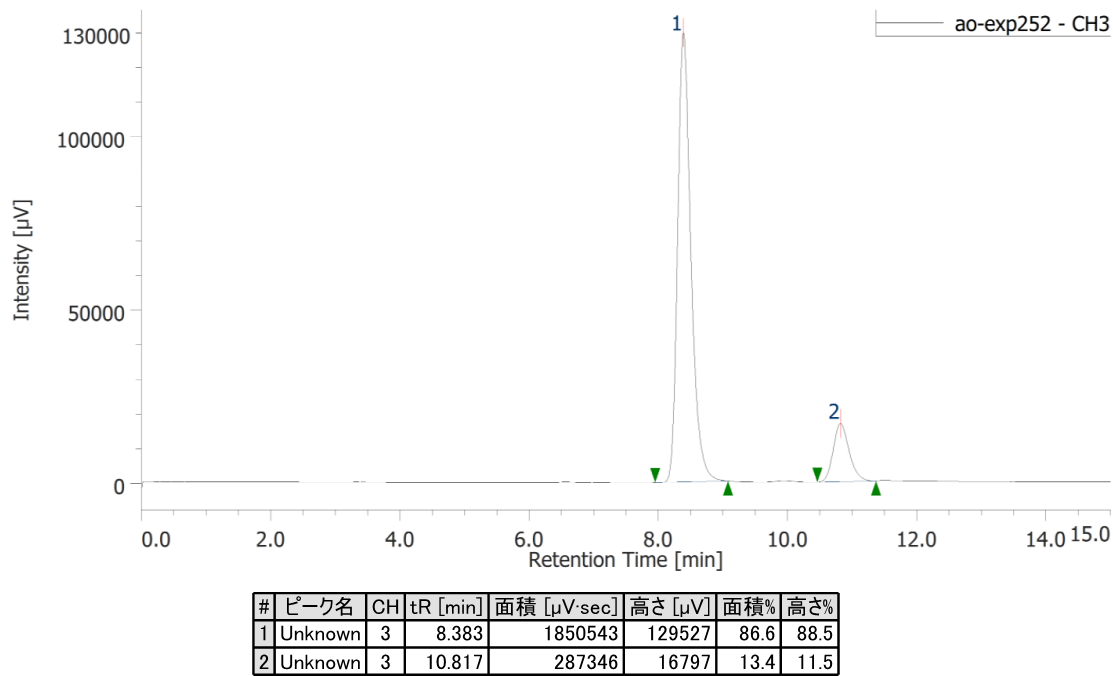

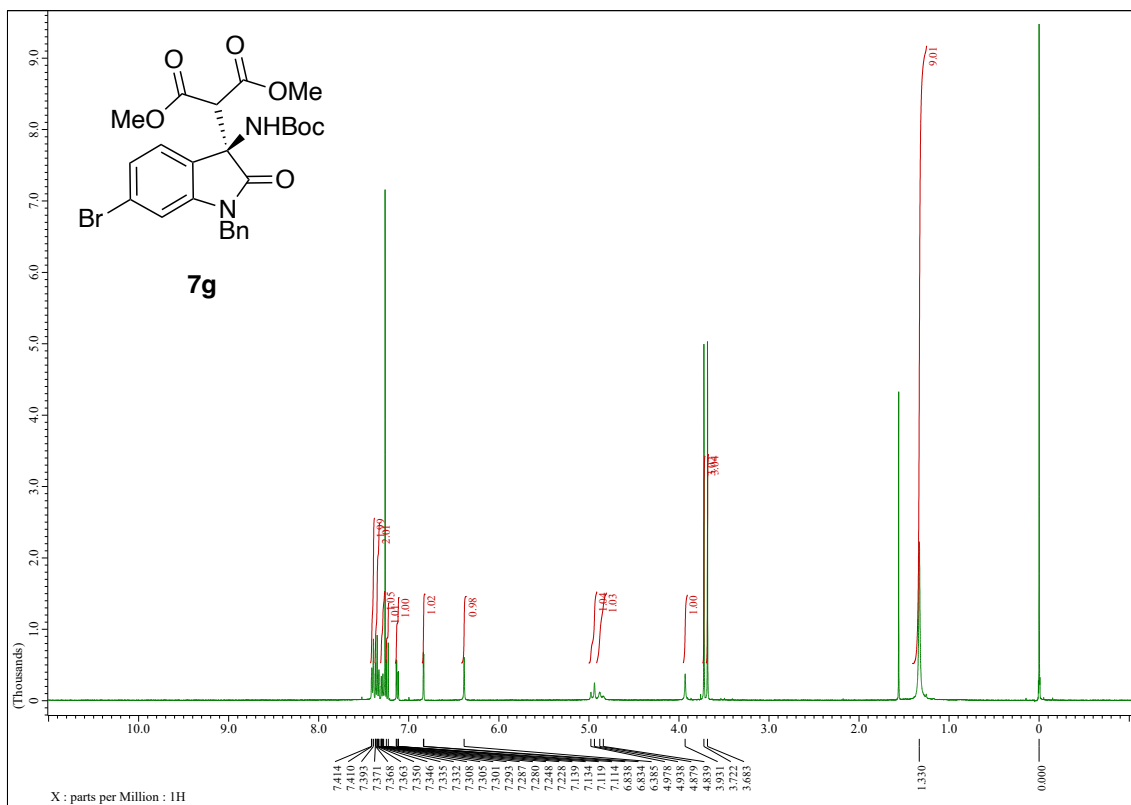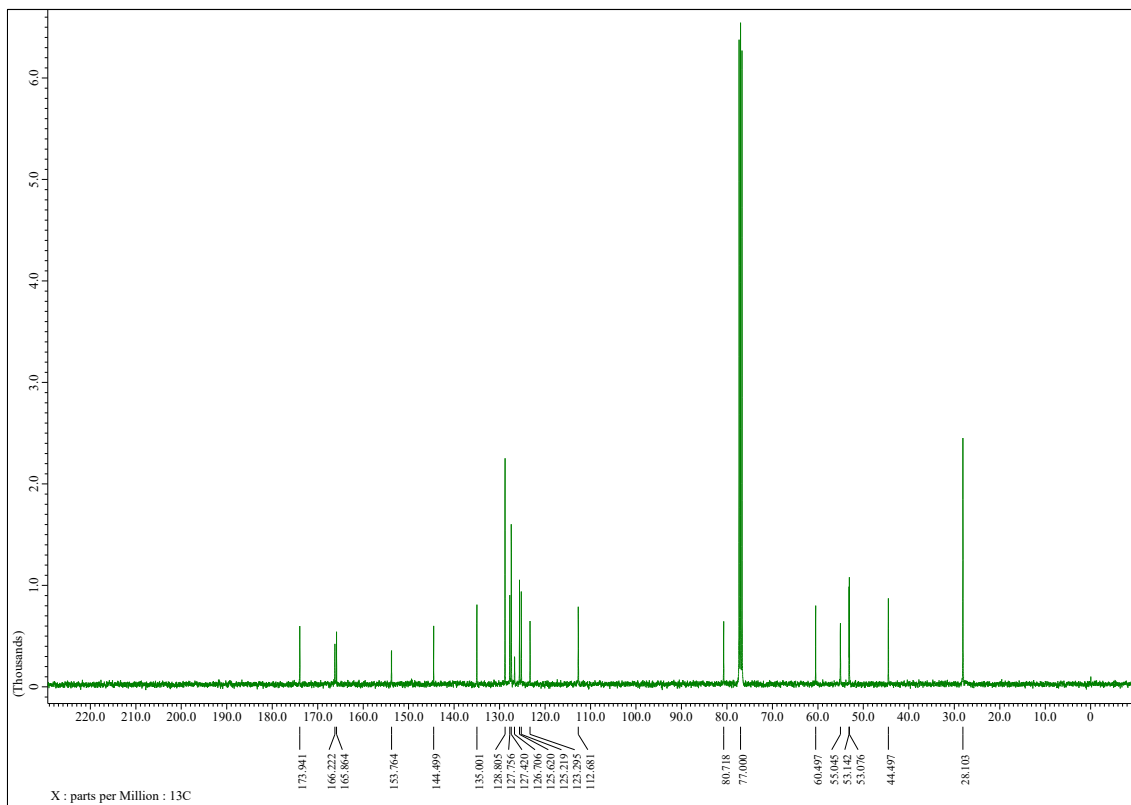

Racemic sample of **7g**

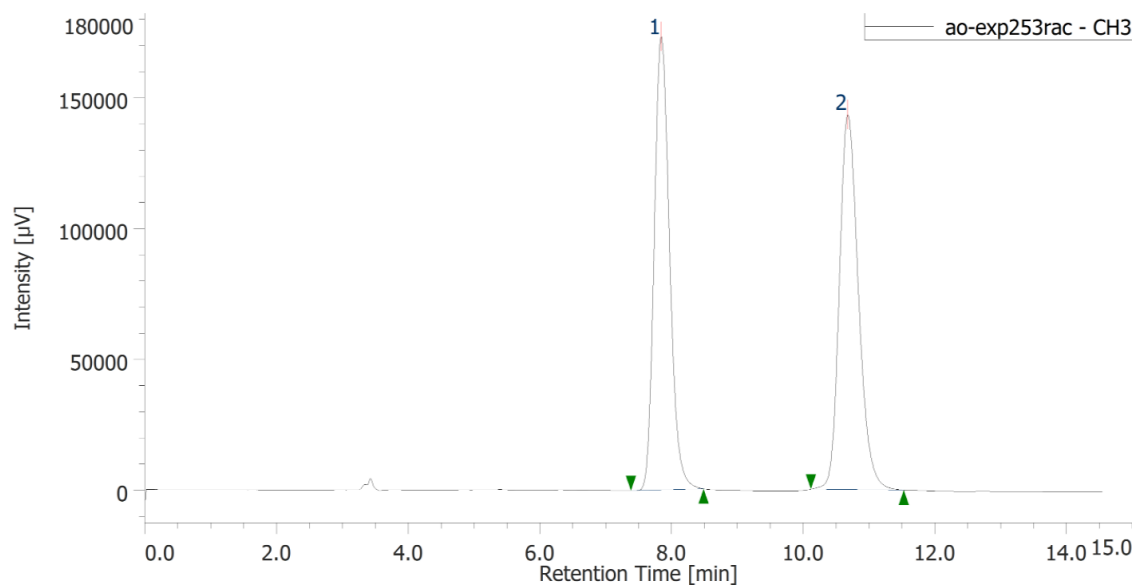

| # | ピーク名    | CH | tR [min] | 面積 [μV·sec] | 高さ [μV] | 面積%  | 高さ%  |
|---|---------|----|----------|-------------|---------|------|------|
| 1 | Unknown | 3  | 7.842    | 2808773     | 173331  | 49.3 | 54.7 |
| 2 | Unknown | 3  | 10.675   | 2886473     | 143286  | 50.7 | 45.3 |

**7g** catalyzed by **4a**

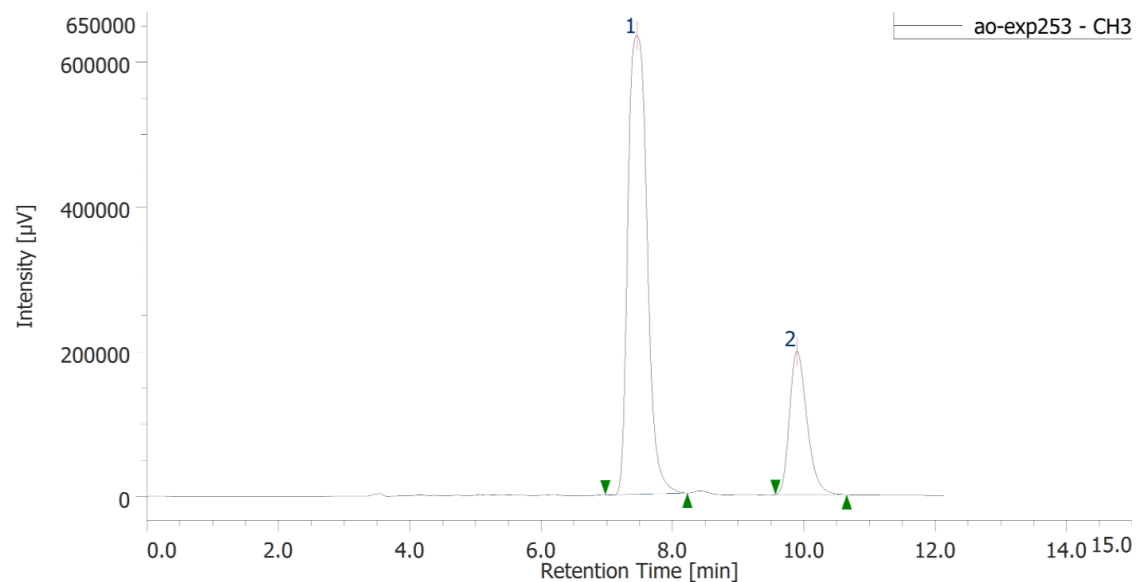

| # | ピーク名    | CH | tR [min] | 面積 [μV·sec] | 高さ [μV] | 面積%  | 高さ%  |
|---|---------|----|----------|-------------|---------|------|------|
| 1 | Unknown | 3  | 7.458    | 12827146    | 633069  | 77.9 | 76.2 |
| 2 | Unknown | 3  | 9.892    | 3647570     | 197759  | 22.1 | 23.8 |

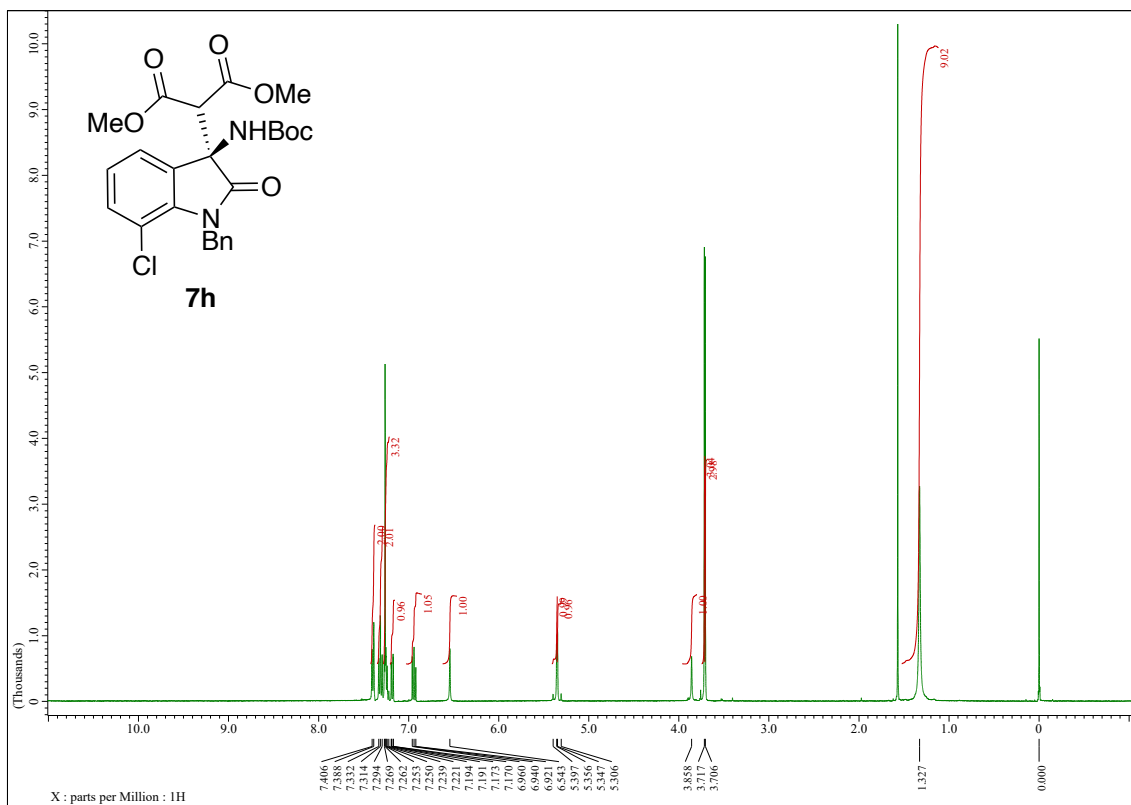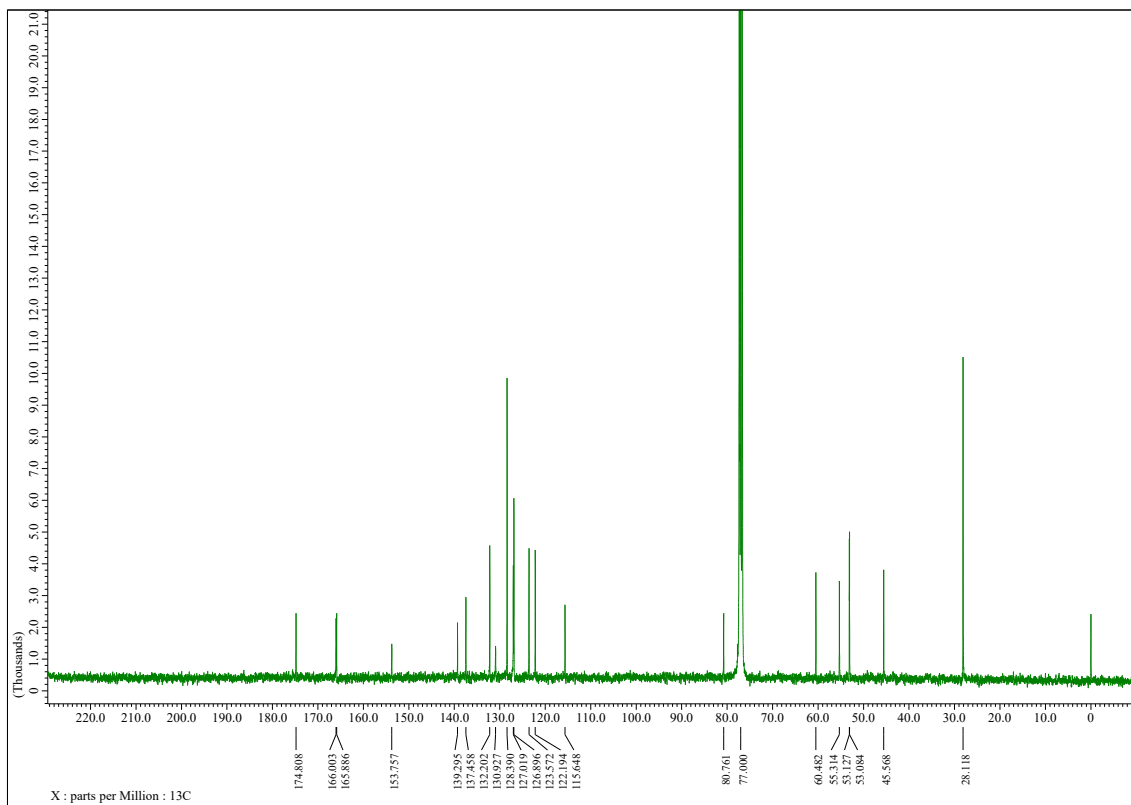

Racemic sample of **7h**

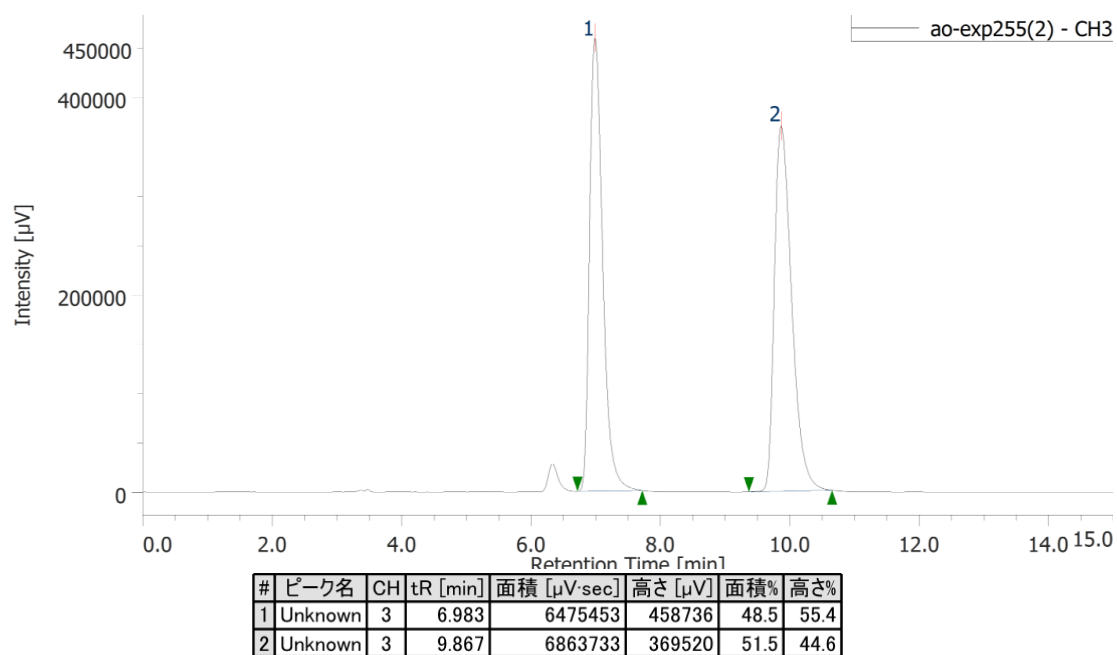

**7h** catalyzed by **4a**

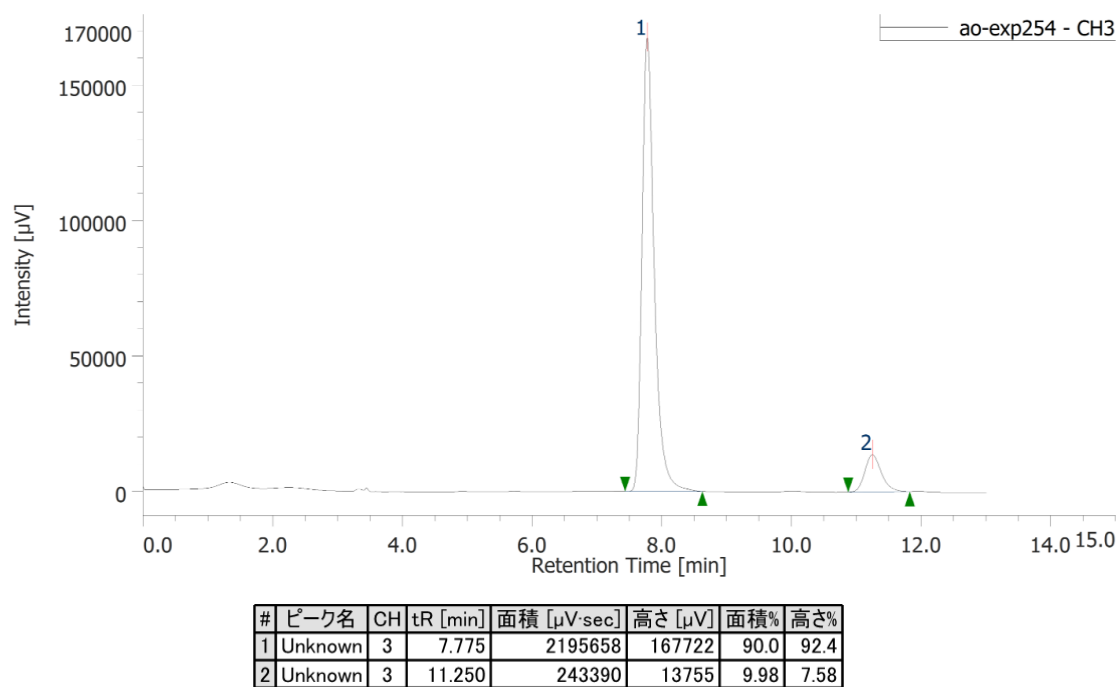

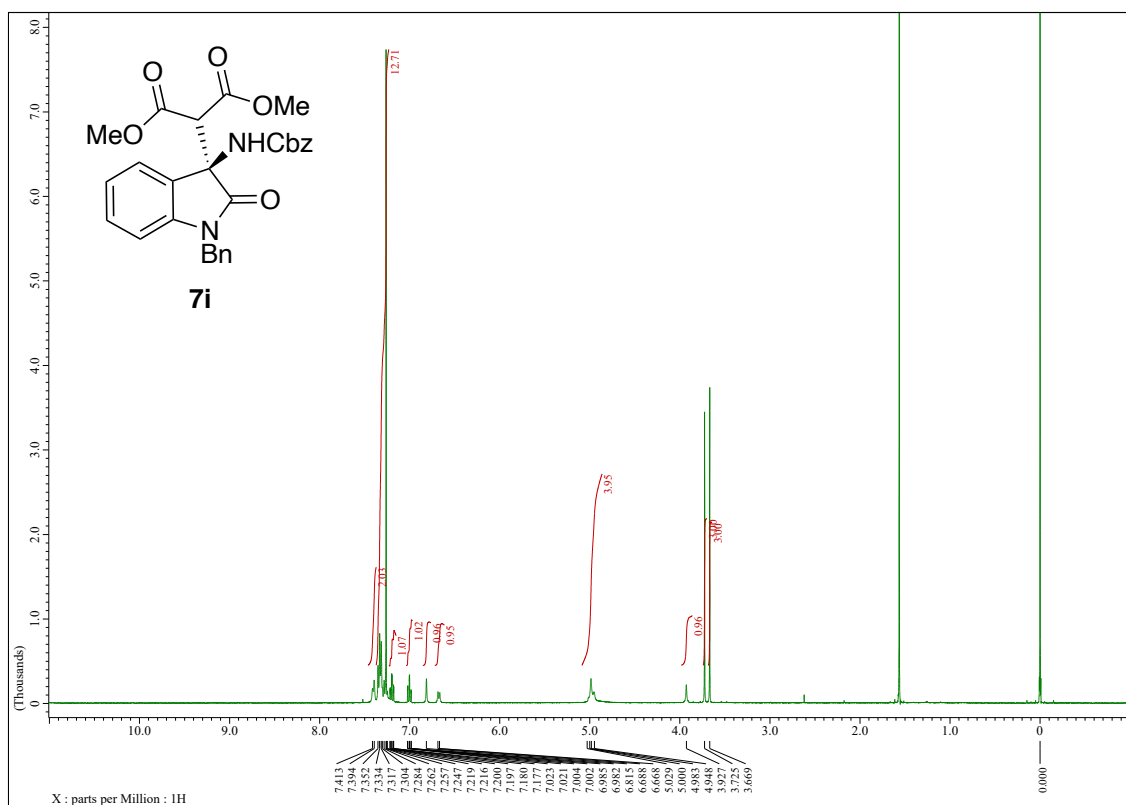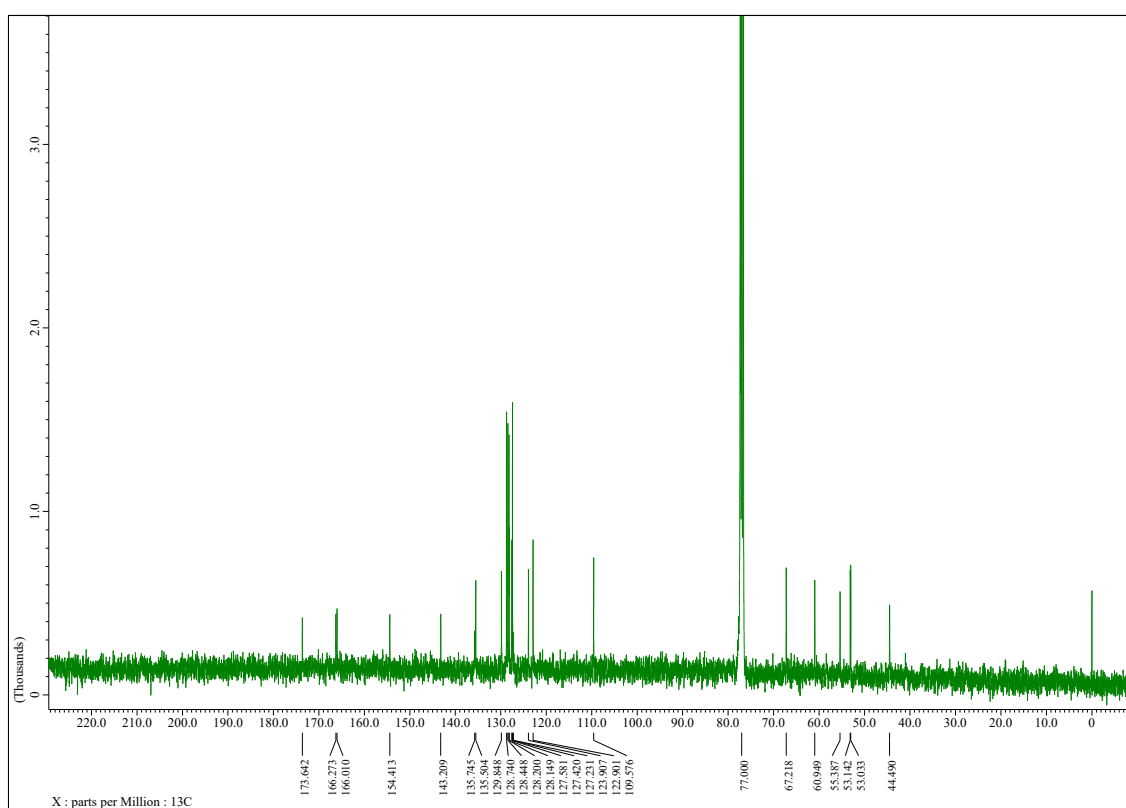

Racemic sample of **7i**

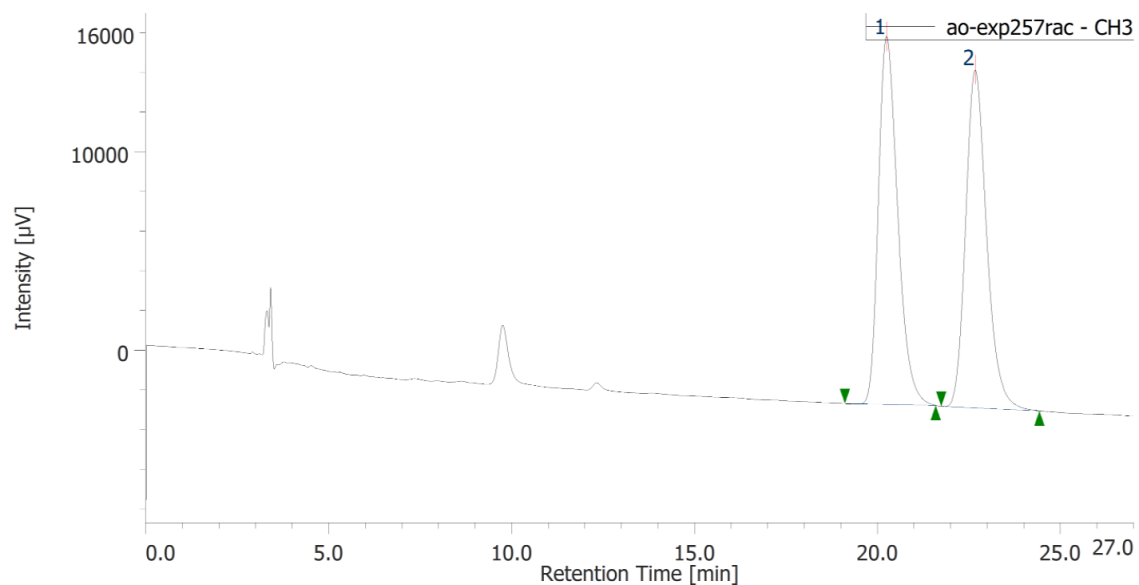

| # | ピーク名    | CH | tR [min] | 面積 [μV·sec] | 高さ [μV] | 面積%  | 高さ%  |
|---|---------|----|----------|-------------|---------|------|------|
| 1 | Unknown | 3  | 20.242   | 678230      | 18537   | 50.1 | 52.1 |
| 2 | Unknown | 3  | 22.667   | 674899      | 17018   | 49.9 | 47.9 |

**7i** catalyzed by **4a**

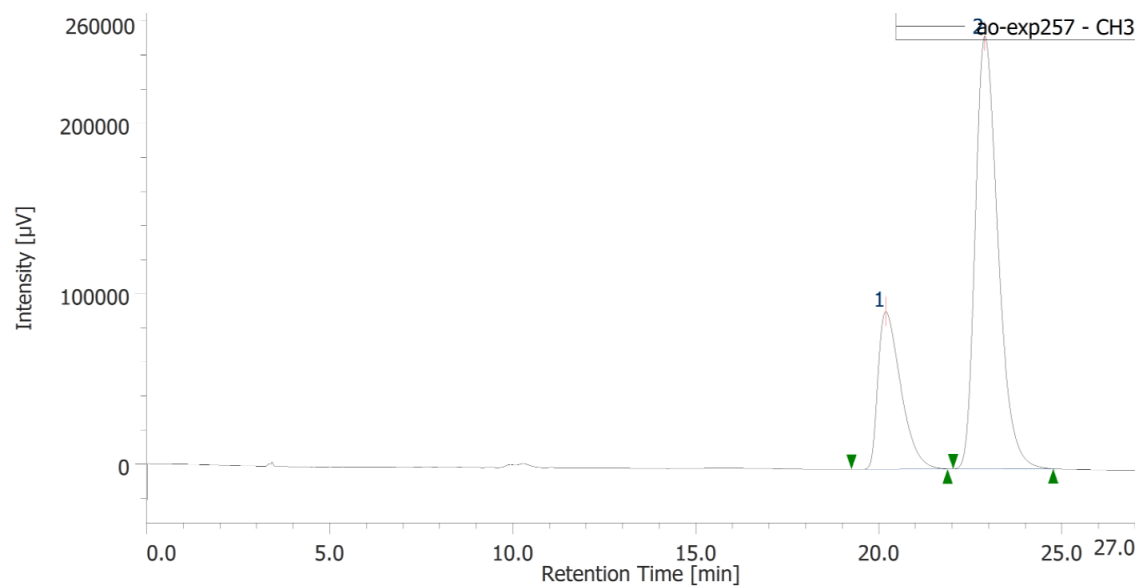

| # | ピーク名    | CH | tR [min] | 面積 [μV·sec] | 高さ [μV] | 面積%  | 高さ%  |
|---|---------|----|----------|-------------|---------|------|------|
| 1 | Unknown | 3  | 20.183   | 3985252     | 92517   | 26.7 | 26.7 |
| 2 | Unknown | 3  | 22.883   | 10921682    | 253860  | 73.3 | 73.3 |

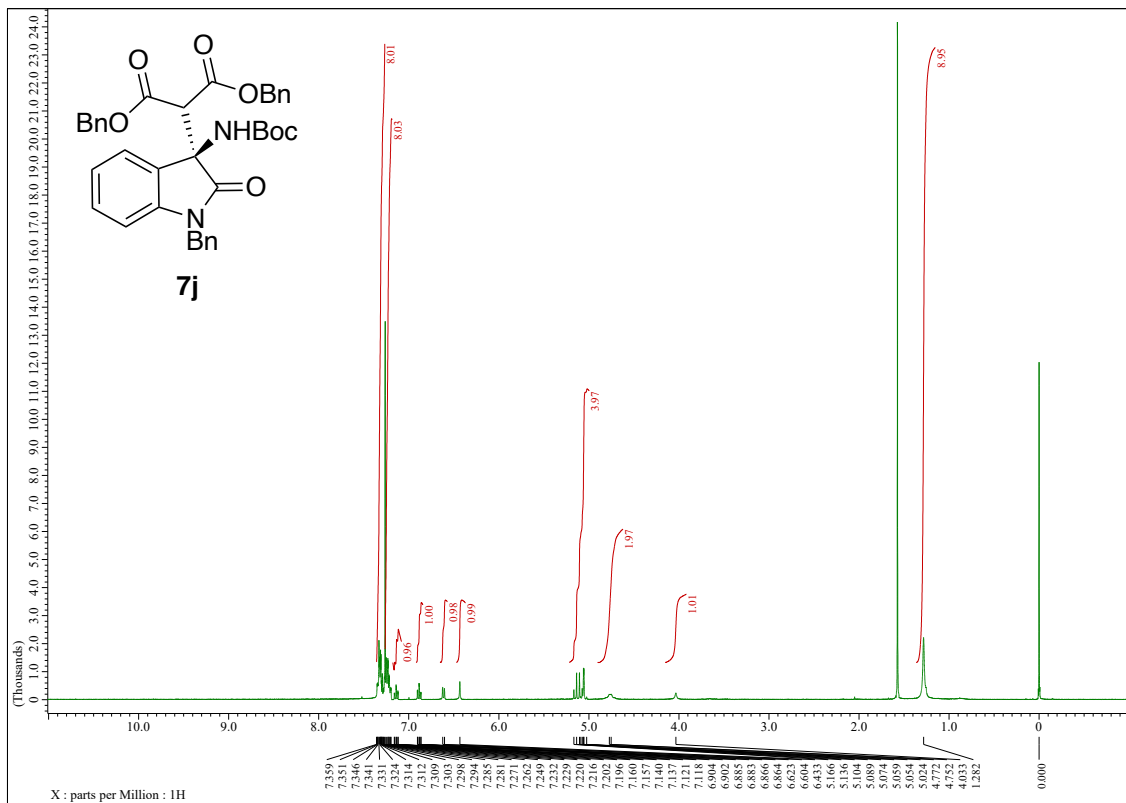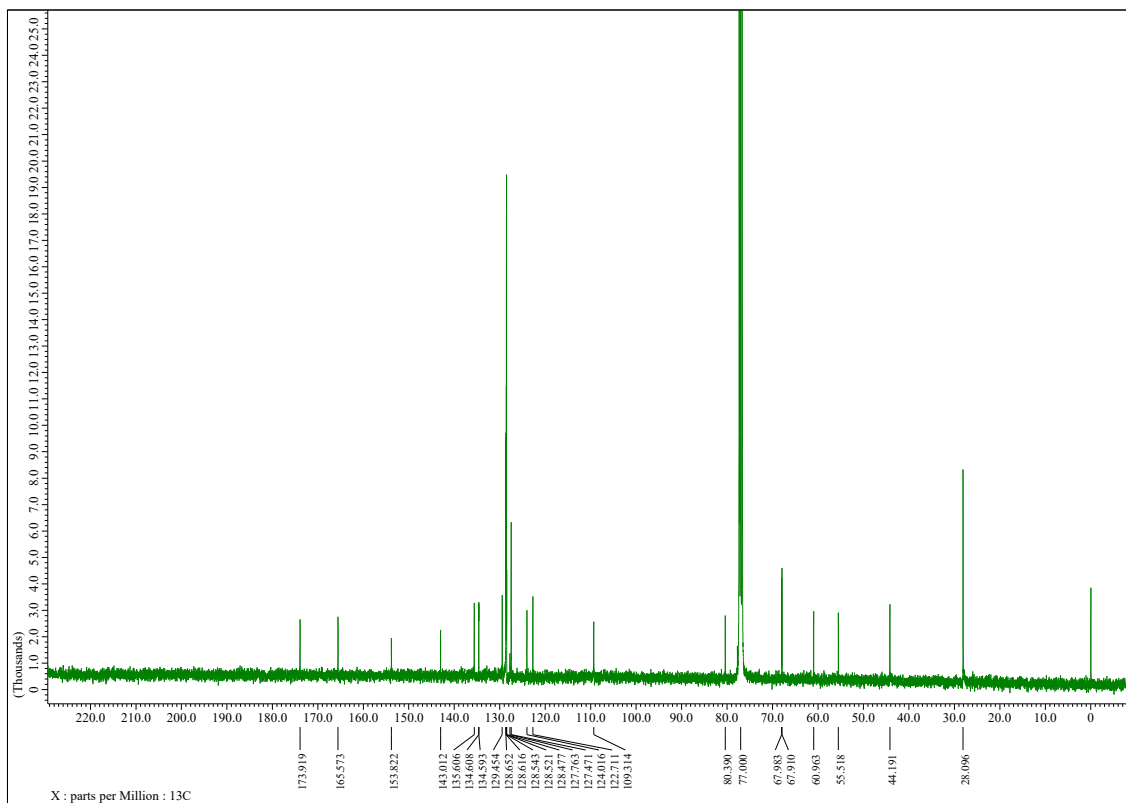



Racemic sample of **7j**

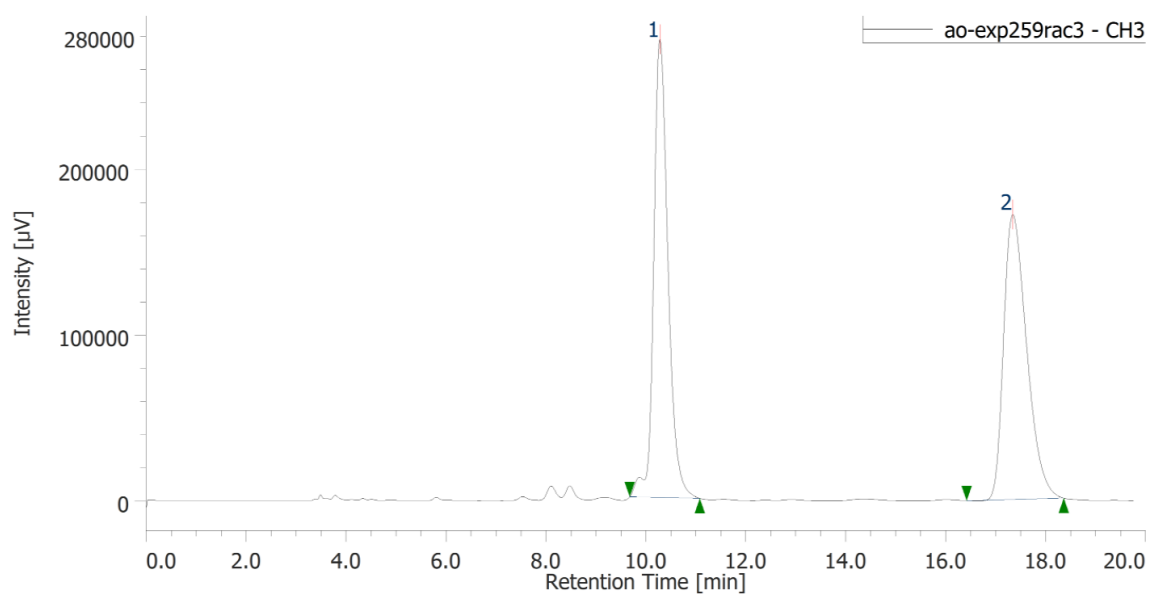

| # | ピーク名    | CH | tR [min] | 面積 [μV·sec] | 高さ [μV] | 面積%  | 高さ%  |
|---|---------|----|----------|-------------|---------|------|------|
| 1 | Unknown | 3  | 10.283   | 5506445     | 276038  | 50.1 | 61.7 |
| 2 | Unknown | 3  | 17.342   | 5494019     | 171610  | 49.9 | 38.3 |

**7j** catalyzed by **4a**

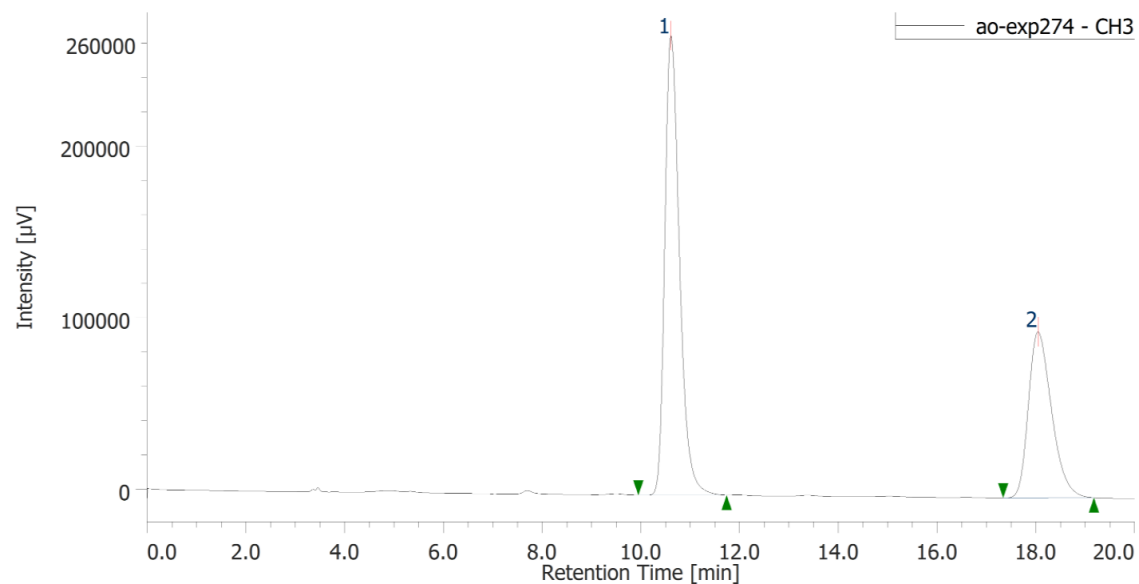

| # | ピーク名    | CH | tR [min] | 面積 [μV·sec] | 高さ [μV] | 面積%  | 高さ%  |
|---|---------|----|----------|-------------|---------|------|------|
| 1 | Unknown | 3  | 10.608   | 5541817     | 267545  | 63.8 | 73.5 |
| 2 | Unknown | 3  | 18.042   | 3149248     | 96697   | 36.2 | 26.5 |

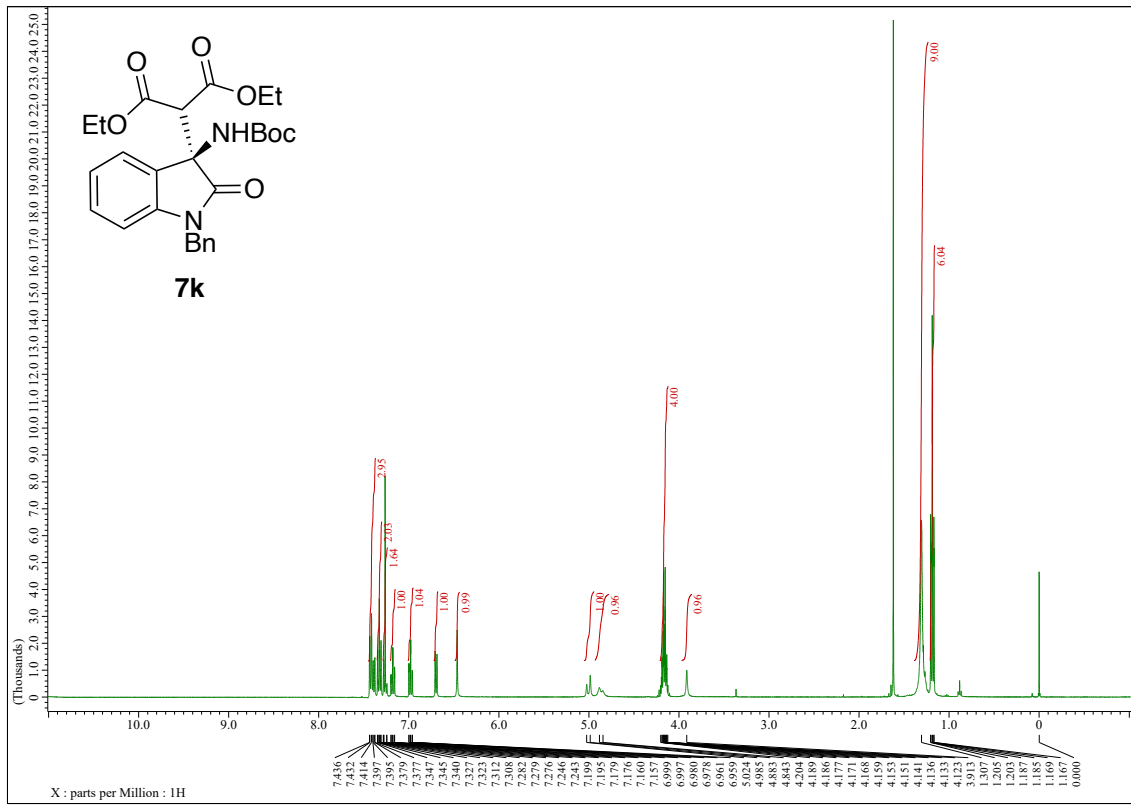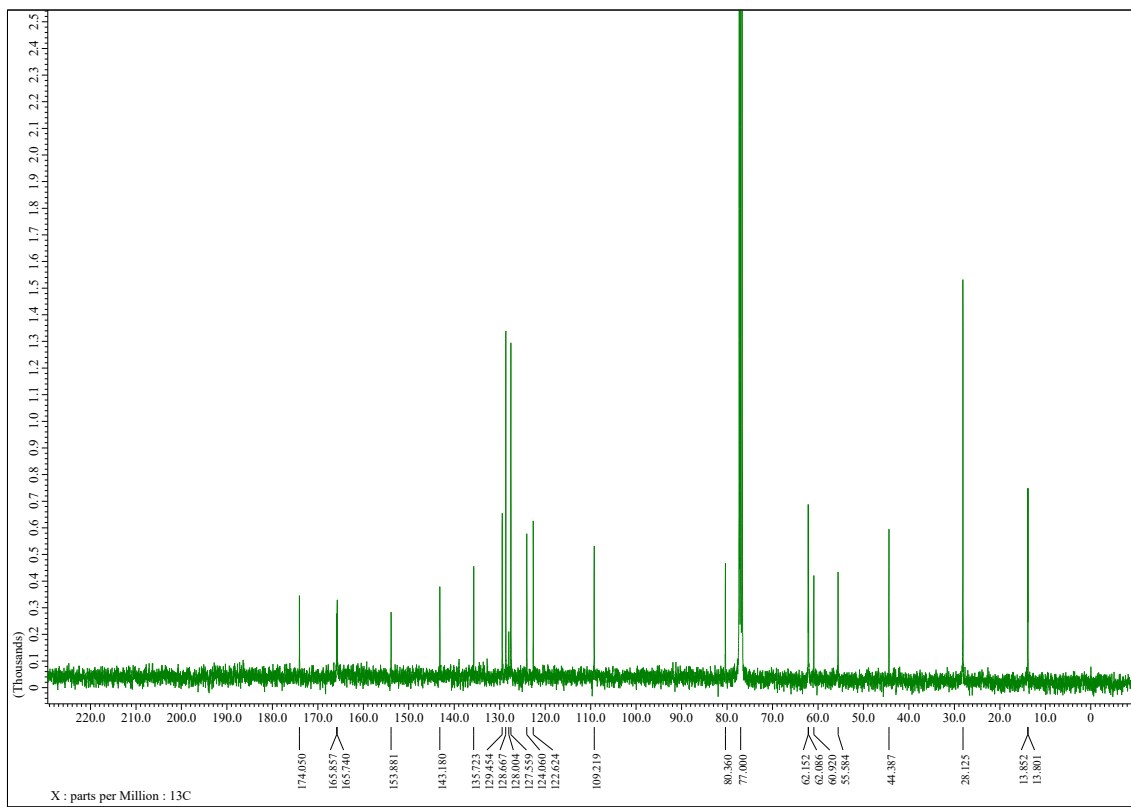

Racemic sample of **7k**

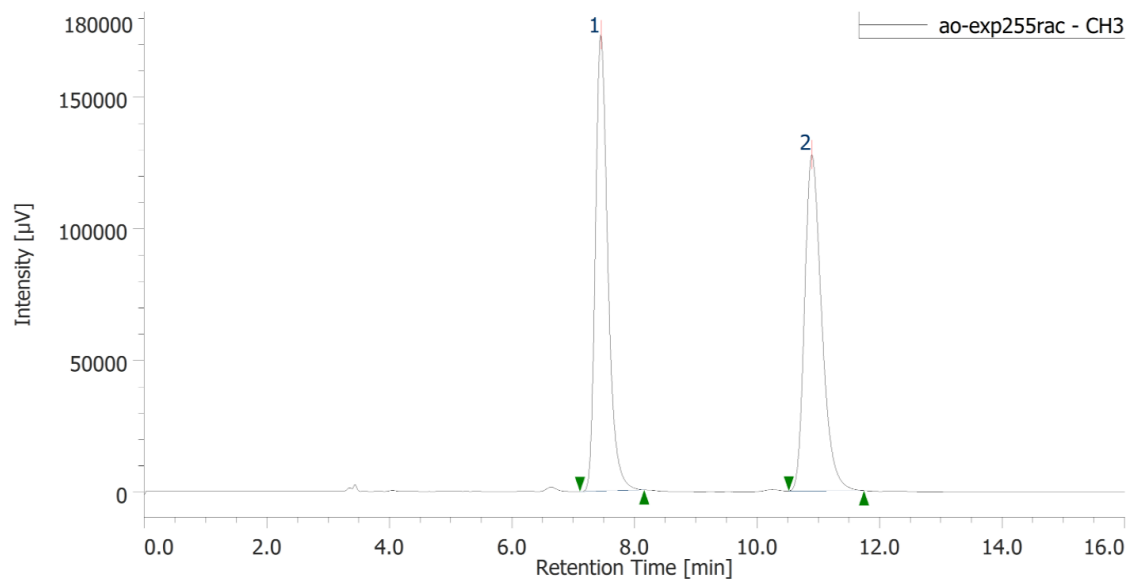

| # | ピーク名    | CH | tR [min] | 面積 [μV·sec] | 高さ [μV] | 面積%  | 高さ%  |
|---|---------|----|----------|-------------|---------|------|------|
| 1 | Unknown | 3  | 7.450    | 2450724     | 173241  | 49.8 | 57.6 |
| 2 | Unknown | 3  | 10.892   | 2467709     | 127557  | 50.2 | 42.4 |

**7k** catalyzed by **4a**

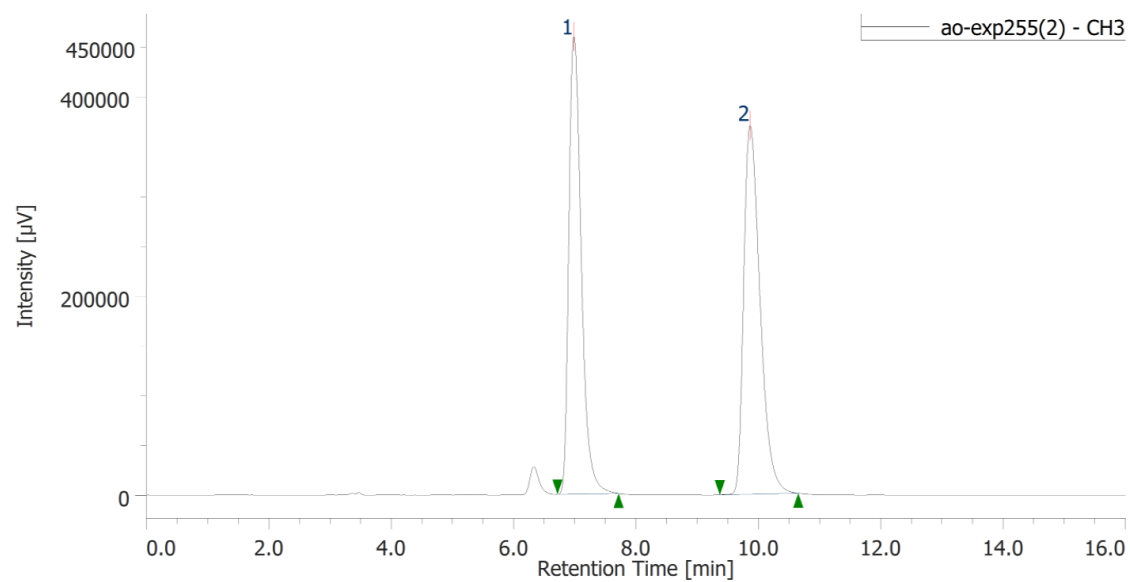

| # | ピーク名    | CH | tR [min] | 面積 [μV·sec] | 高さ [μV] | 面積%  | 高さ%  |
|---|---------|----|----------|-------------|---------|------|------|
| 1 | Unknown | 3  | 6.983    | 6475453     | 458736  | 48.5 | 55.4 |
| 2 | Unknown | 3  | 9.867    | 6863733     | 369520  | 51.5 | 44.6 |

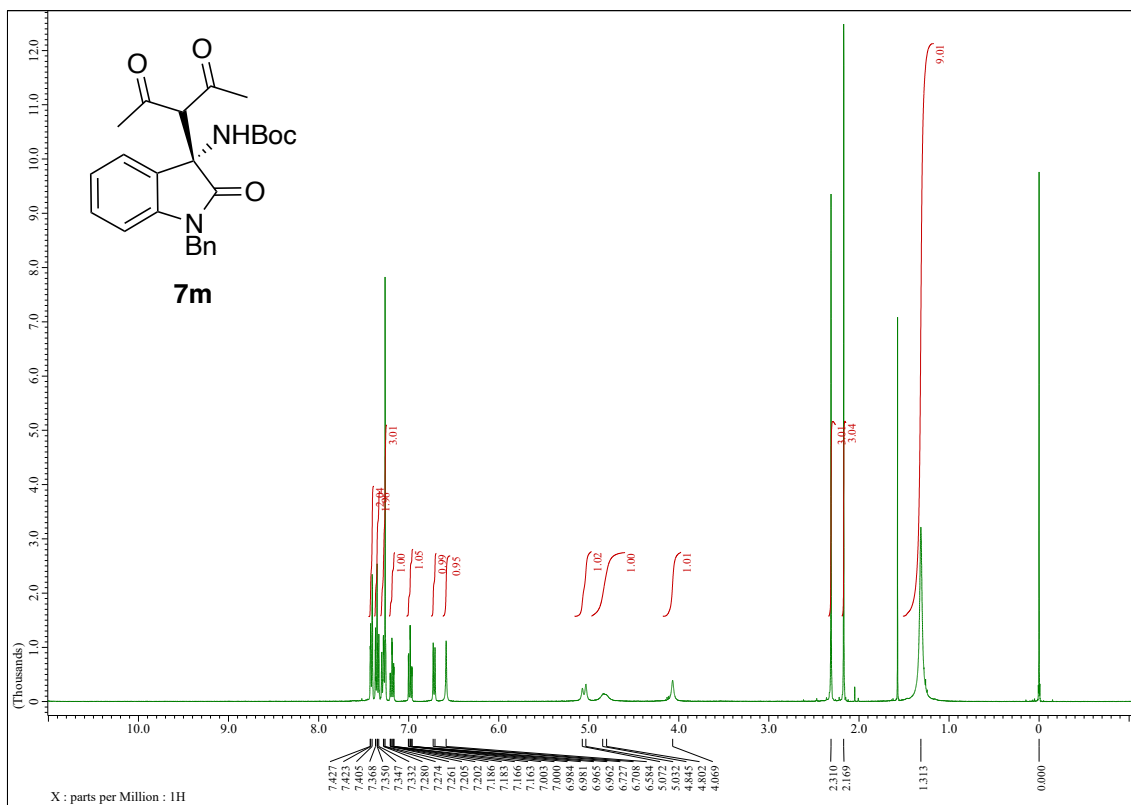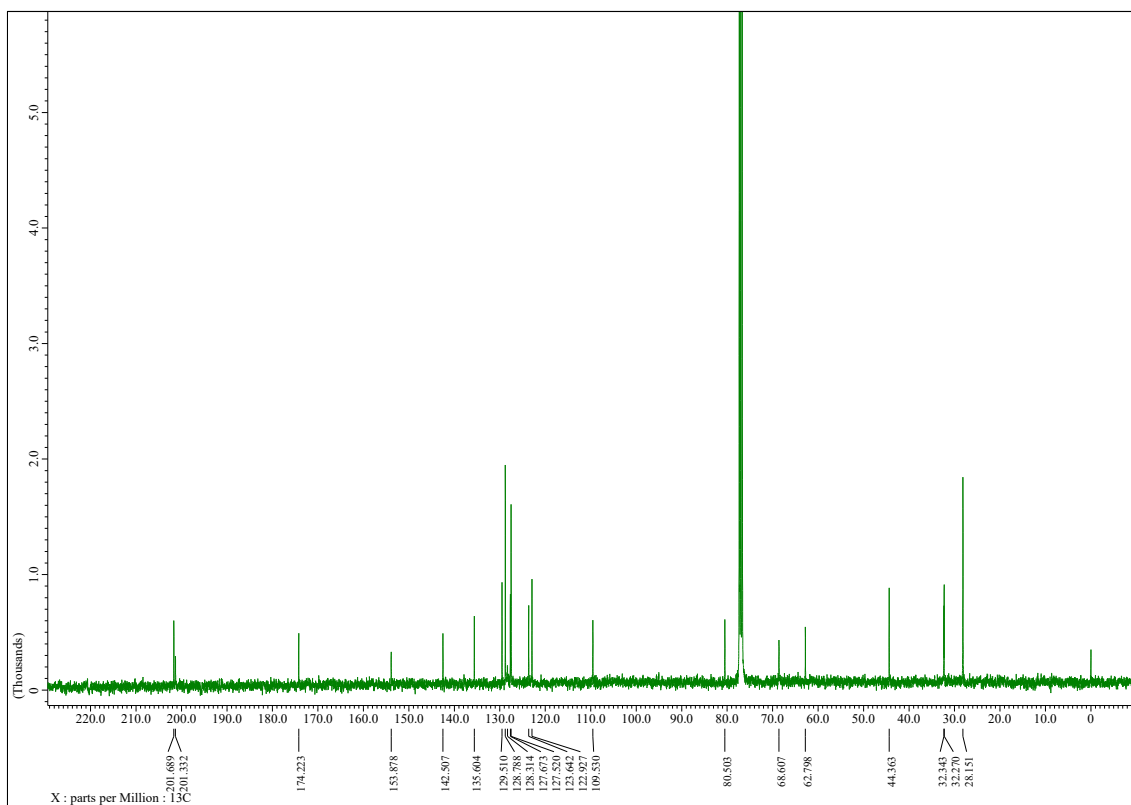

Racemic sample of **7m**; HPLC (CHIRALPAK IC column, hexane/2-propanol = 95/5, flow rate 1.0 mL/min, 25 °C, 210 nm)

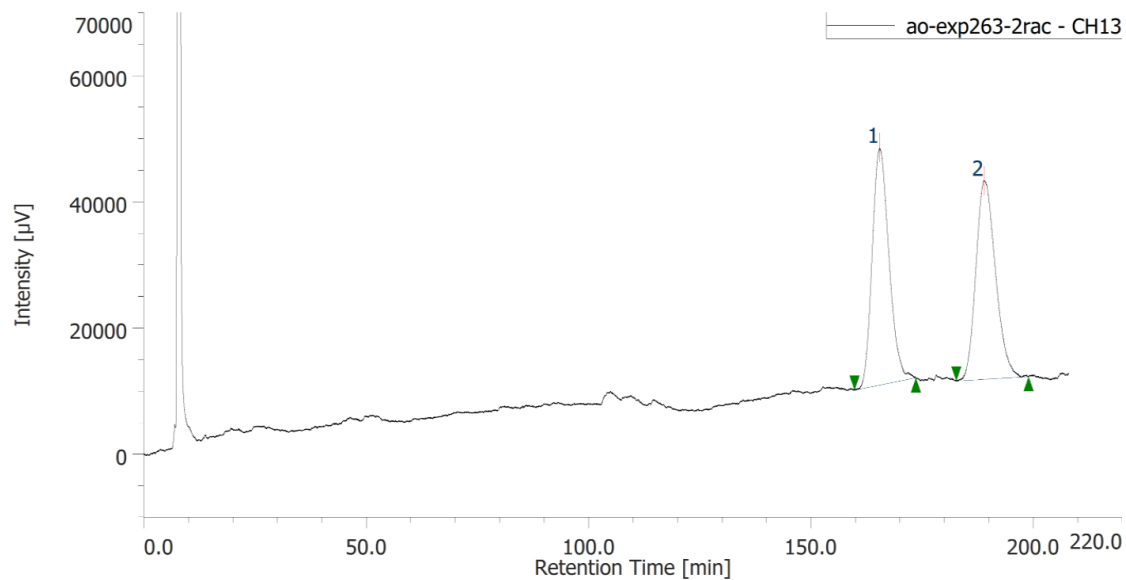

| # | ピーク名    | CH | tR [min] | 面積 [μV·sec] | 高さ [μV] | 面積%  | 高さ%  |
|---|---------|----|----------|-------------|---------|------|------|
| 1 | Unknown | 13 | 165.415  | 9866216     | 37638   | 50.5 | 54.4 |
| 2 | Unknown | 13 | 188.908  | 9658658     | 31514   | 49.5 | 45.6 |

**7m** catalyzed by **4a**

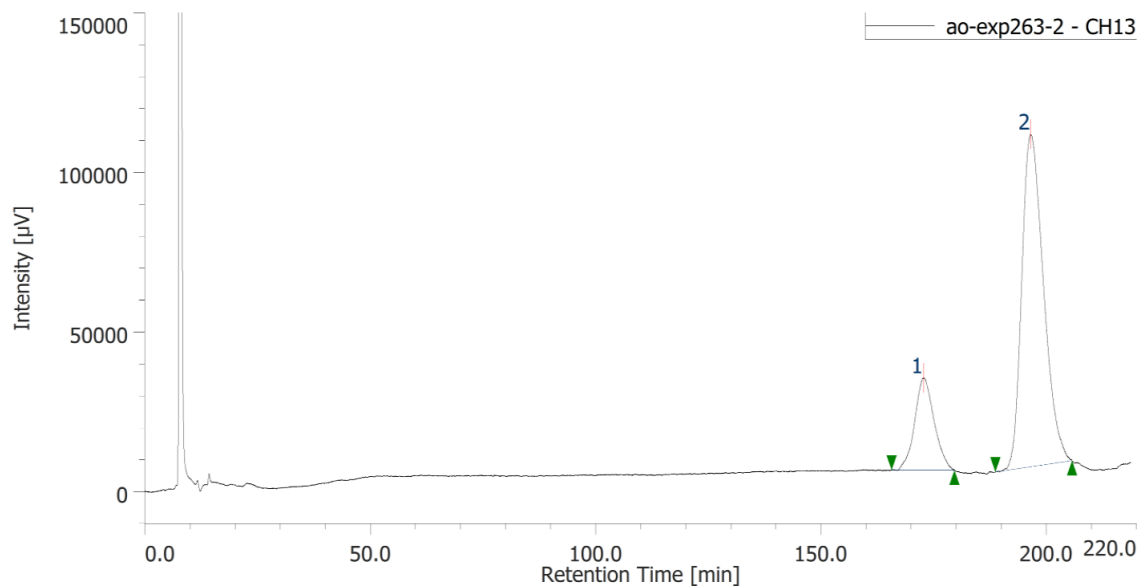

| # | ピーク名    | CH | tR [min] | 面積 [μV·sec] | 高さ [μV] | 面積%  | 高さ%  |
|---|---------|----|----------|-------------|---------|------|------|
| 1 | Unknown | 13 | 172.718  | 8618129     | 28868   | 19.8 | 21.7 |
| 2 | Unknown | 13 | 196.508  | 34916305    | 104057  | 80.2 | 78.3 |

Racemic sample of **7m**; HPLC (CHIRALPAK IA column, hexane/2-propanol = 80/20, flow rate 1.0 mL/min, 25 °C, 254 nm)

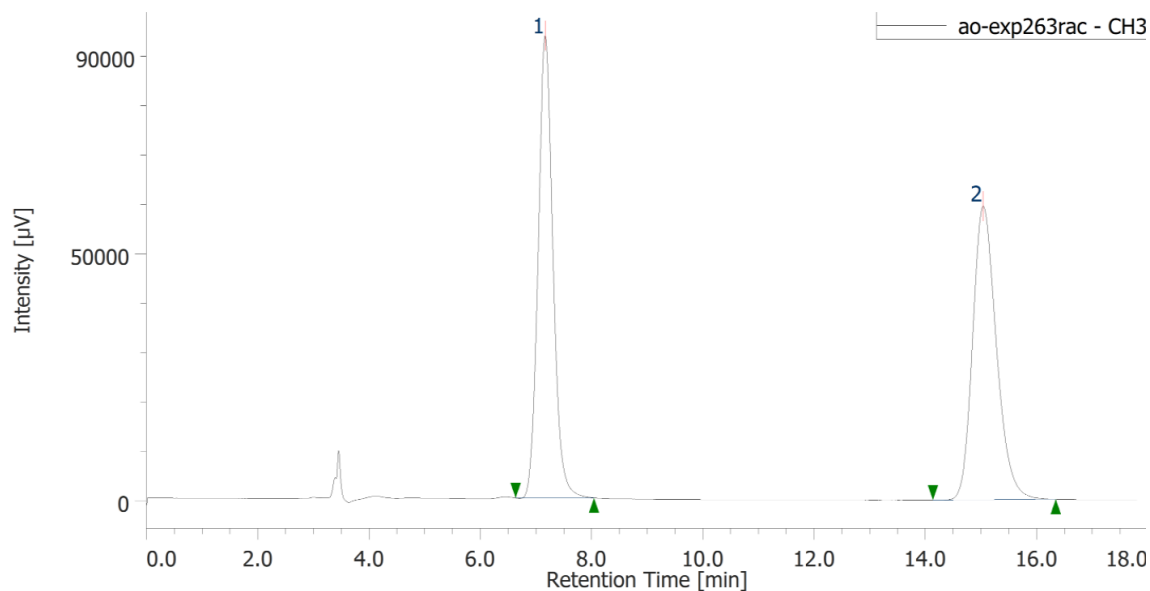

| # | ピーク名    | CH | tR [min] | 面積 [μV·sec] | 高さ [μV] | 面積%  | 高さ%  |
|---|---------|----|----------|-------------|---------|------|------|
| 1 | Unknown | 3  | 7.167    | 1734570     | 93567   | 49.6 | 61.2 |
| 2 | Unknown | 3  | 15.033   | 1760787     | 59373   | 50.4 | 38.8 |

**7m** catalyzed by **4a**

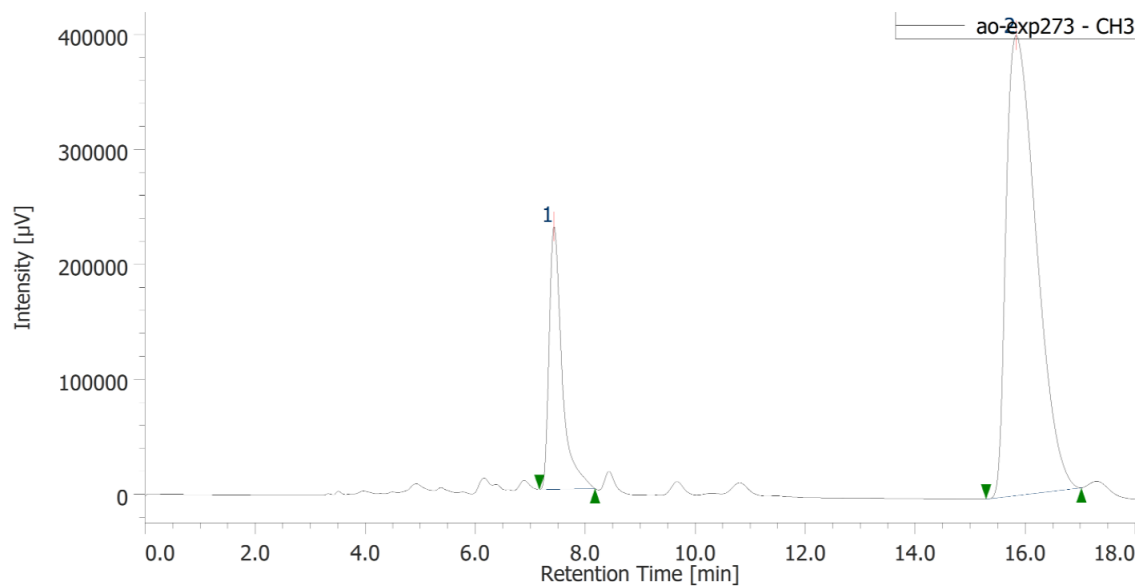

| # | ピーク名    | CH | tR [min] | 面積 [μV·sec] | 高さ [μV] | 面積%  | 高さ%  |
|---|---------|----|----------|-------------|---------|------|------|
| 1 | Unknown | 3  | 7.433    | 3741533     | 228637  | 19.7 | 36.4 |
| 2 | Unknown | 3  | 15.833   | 15226451    | 400186  | 80.3 | 63.6 |

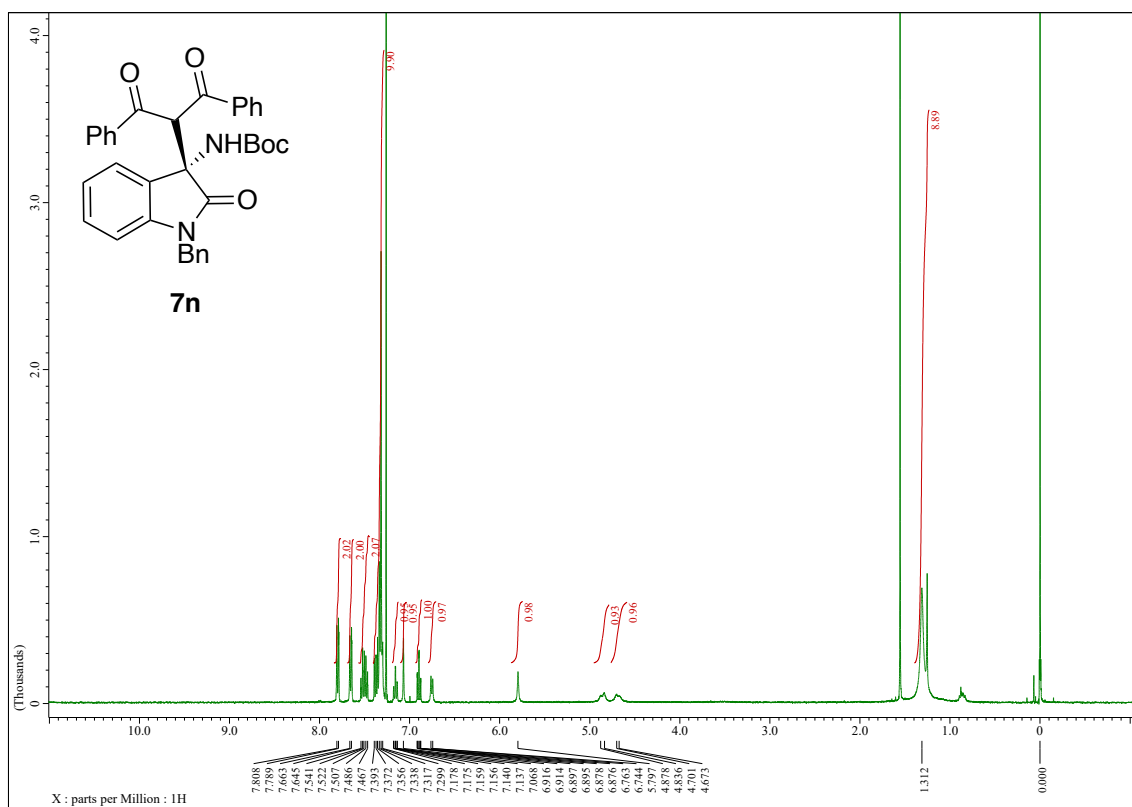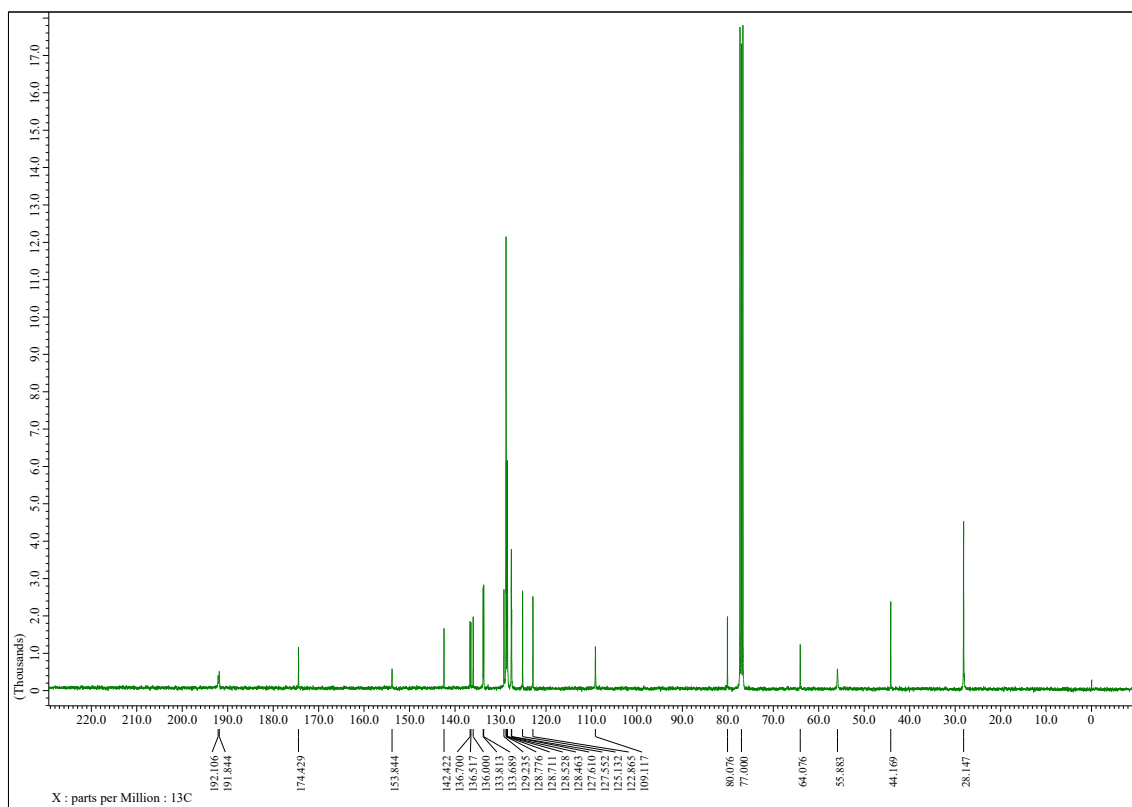

Racemic sample of **7n**

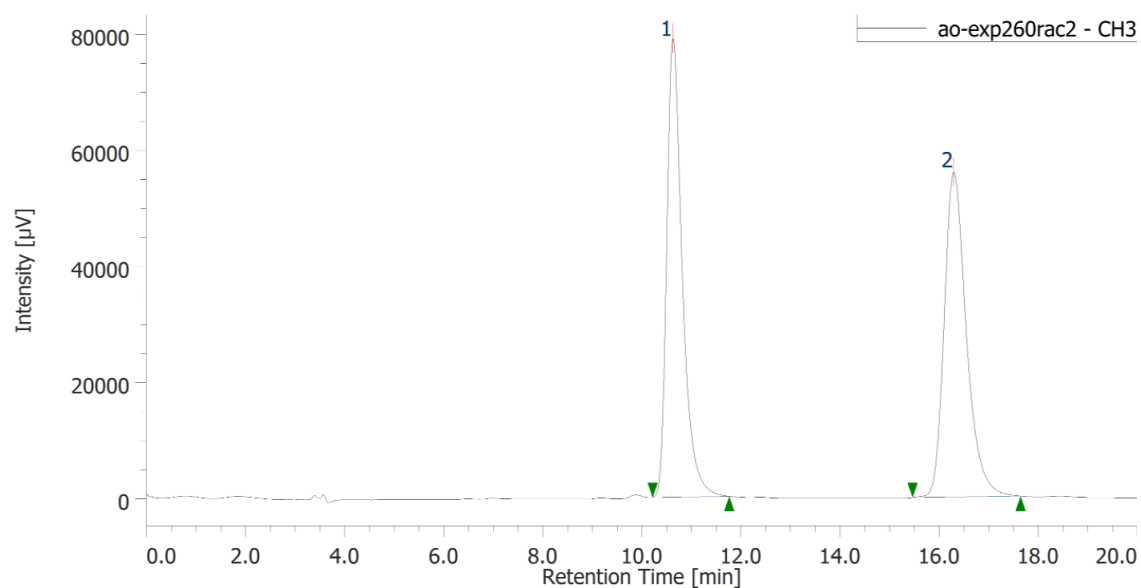

| # | ピーク名    | CH | tR [min] | 面積 [μV·sec] | 高さ [μV] | 面積%  | 高さ%  |
|---|---------|----|----------|-------------|---------|------|------|
| 1 | Unknown | 3  | 10.625   | 1718643     | 79049   | 49.7 | 58.6 |
| 2 | Unknown | 3  | 16.292   | 1737799     | 55939   | 50.3 | 41.4 |

Racemic sample of **7n**

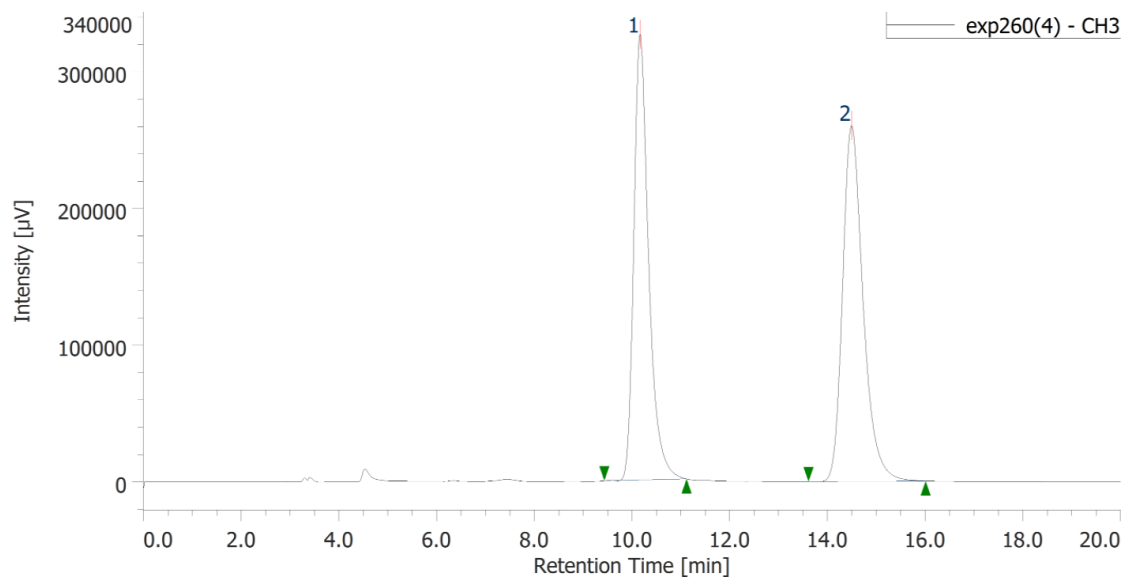

| # | ピーク名    | CH | tR [min] | Area [μV·sec] | Height [μV] | Area%  | Height% |
|---|---------|----|----------|---------------|-------------|--------|---------|
| 1 | Unknown | 3  | 10.17    | 6873655       | 325893      | 47.565 | 55.592  |
| 2 | Unknown | 3  | 14.49    | 7577525       | 260333      | 52.435 | 44.408  |



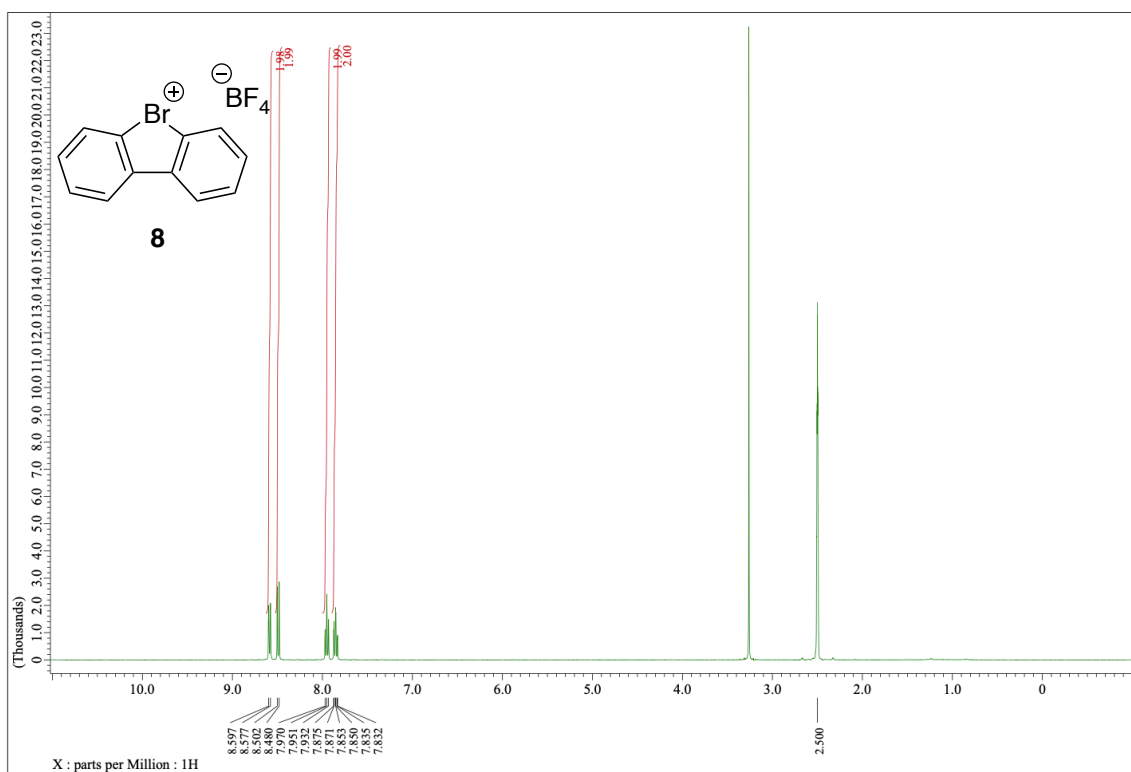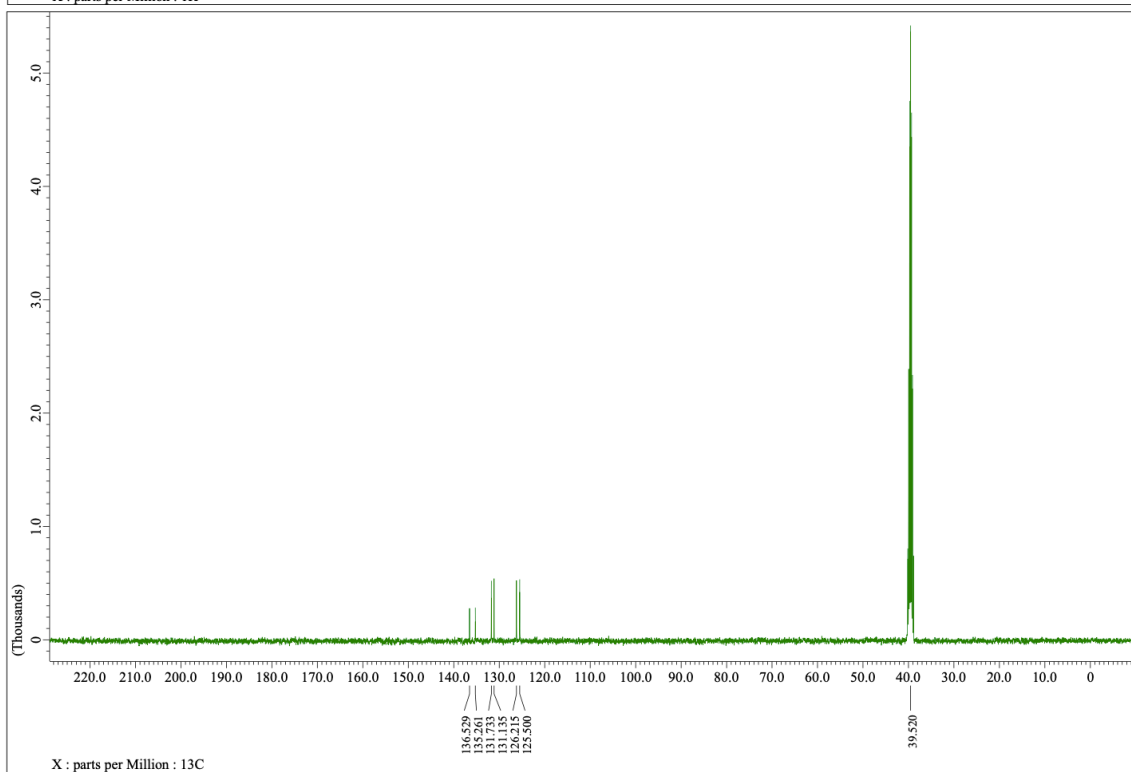

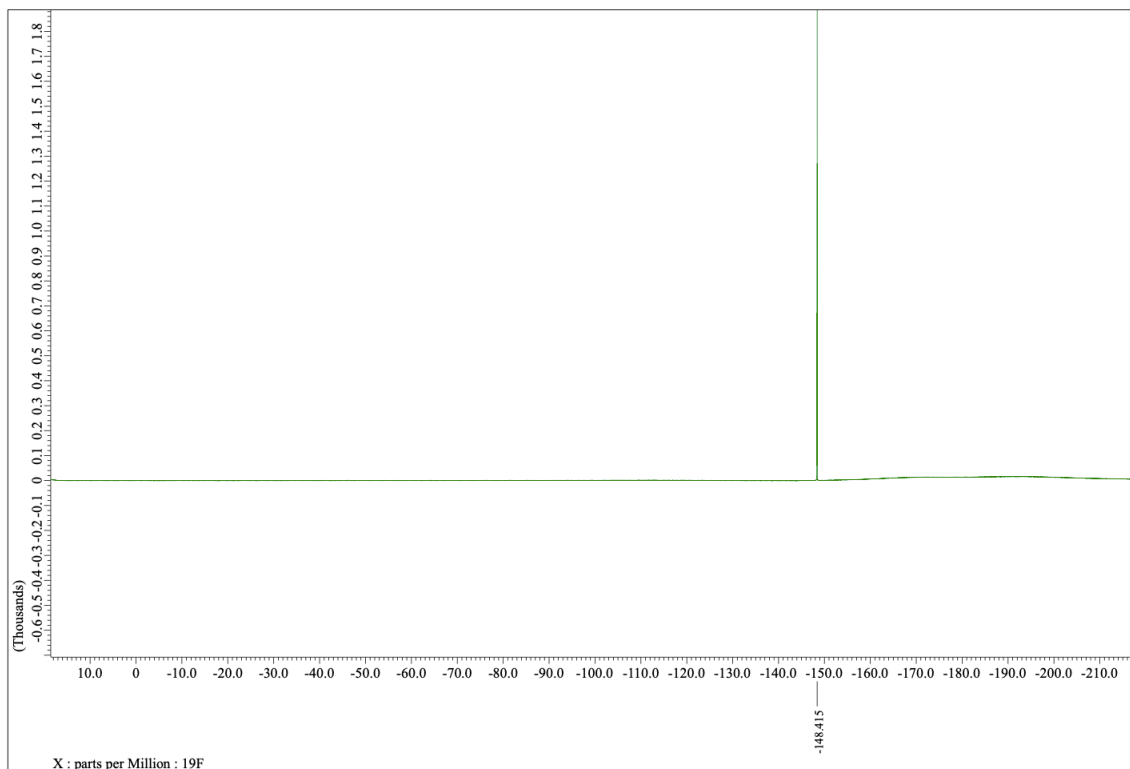

Optimized structure of **4a**.

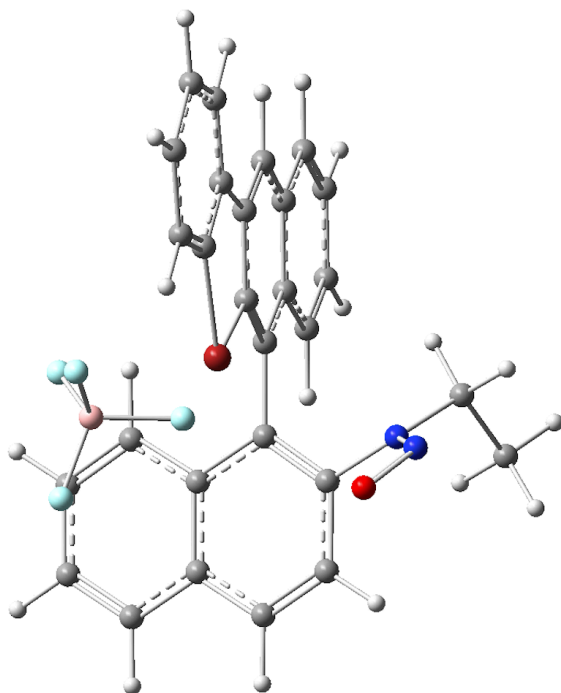

E(RM062X) = -4259.202216 Hartree

| Center<br>Number | Atomic<br>Number | Atomic<br>Type | Coordinates (Angstroms) |           |           |
|------------------|------------------|----------------|-------------------------|-----------|-----------|
|                  |                  |                | X                       | Y         | Z         |
| 1                | 6                | 0              | 4.130674                | 3.760648  | -0.945786 |
| 2                | 6                | 0              | 4.578837                | 2.440055  | -0.697811 |
| 3                | 6                | 0              | 3.681010                | 1.435511  | -0.443777 |
| 4                | 6                | 0              | 2.285711                | 1.702871  | -0.424601 |
| 5                | 6                | 0              | 1.831700                | 3.035125  | -0.663726 |
| 6                | 6                | 0              | 2.792129                | 4.049155  | -0.928284 |
| 7                | 6                | 0              | 1.330455                | 0.672963  | -0.151911 |
| 8                | 6                | 0              | 0.016464                | 1.043108  | -0.131149 |
| 9                | 6                | 0              | -0.473942               | 2.348883  | -0.364874 |
| 10               | 6                | 0              | 0.447005                | 3.333627  | -0.631231 |
| 11               | 6                | 0              | 1.713930                | -0.740613 | 0.113789  |
| 12               | 6                | 0              | 2.170565                | -1.580068 | -0.953689 |
| 13               | 6                | 0              | 2.473308                | -2.941885 | -0.675657 |
| 14               | 6                | 0              | 2.309018                | -3.437455 | 0.645972  |
| 15               | 6                | 0              | 1.872696                | -2.624835 | 1.652750  |

|    |    |   |           |           |           |
|----|----|---|-----------|-----------|-----------|
| 16 | 6  | 0 | 1.577339  | -1.263997 | 1.383552  |
| 17 | 6  | 0 | 2.313062  | -1.105735 | -2.284521 |
| 18 | 6  | 0 | 2.745788  | -1.943636 | -3.281052 |
| 19 | 6  | 0 | 3.056890  | -3.294384 | -3.001848 |
| 20 | 6  | 0 | 2.920880  | -3.780874 | -1.727425 |
| 21 | 6  | 0 | -2.616843 | 1.272940  | -0.034828 |
| 22 | 6  | 0 | -1.929775 | 2.457129  | -0.301375 |
| 23 | 6  | 0 | -3.985398 | 1.143517  | 0.065707  |
| 24 | 6  | 0 | -4.714886 | 2.317080  | -0.124930 |
| 25 | 6  | 0 | -4.083169 | 3.532056  | -0.393510 |
| 26 | 6  | 0 | -2.699344 | 3.608692  | -0.482368 |
| 27 | 7  | 0 | 1.179952  | -0.422776 | 2.470928  |
| 28 | 1  | 0 | 4.853984  | 4.543762  | -1.148171 |
| 29 | 1  | 0 | 5.642082  | 2.223518  | -0.710941 |
| 30 | 1  | 0 | 4.023903  | 0.421915  | -0.258881 |
| 31 | 1  | 0 | 2.440759  | 5.060232  | -1.114027 |
| 32 | 1  | 0 | 0.124420  | 4.353506  | -0.822119 |
| 33 | 1  | 0 | 2.533850  | -4.481473 | 0.844071  |
| 34 | 1  | 0 | 1.734552  | -2.998203 | 2.661369  |
| 35 | 1  | 0 | 2.067377  | -0.073281 | -2.511724 |
| 36 | 1  | 0 | 2.843557  | -1.569312 | -4.294909 |
| 37 | 1  | 0 | 3.394519  | -3.945143 | -3.801794 |
| 38 | 1  | 0 | 3.145022  | -4.819882 | -1.502886 |
| 39 | 1  | 0 | -4.472230 | 0.194354  | 0.256648  |
| 40 | 1  | 0 | -5.796703 | 2.267240  | -0.067263 |
| 41 | 1  | 0 | -4.678184 | 4.427455  | -0.538651 |
| 42 | 1  | 0 | -2.211378 | 4.555115  | -0.693602 |
| 43 | 5  | 0 | -3.973368 | -2.000666 | -0.592377 |
| 44 | 9  | 0 | -3.284830 | -1.278186 | -1.583335 |
| 45 | 9  | 0 | -5.293984 | -1.568369 | -0.522996 |
| 46 | 9  | 0 | -3.855791 | -3.351590 | -0.770715 |
| 47 | 9  | 0 | -3.350015 | -1.621387 | 0.664929  |
| 48 | 35 | 0 | -1.389483 | -0.203977 | 0.198871  |
| 49 | 8  | 0 | -0.567576 | -1.632223 | 2.837419  |
| 50 | 7  | 0 | 0.115685  | -0.718935 | 3.240072  |
| 51 | 6  | 0 | 2.078339  | 0.600145  | 3.002236  |

|    |   |   |          |           |          |
|----|---|---|----------|-----------|----------|
| 52 | 1 | 0 | 2.236296 | 1.368119  | 2.238213 |
| 53 | 1 | 0 | 1.532330 | 1.055819  | 3.831509 |
| 54 | 6 | 0 | 3.408239 | 0.019216  | 3.466227 |
| 55 | 1 | 0 | 3.249288 | -0.729562 | 4.247509 |
| 56 | 1 | 0 | 3.940790 | -0.454513 | 2.635855 |
| 57 | 1 | 0 | 4.043127 | 0.812980  | 3.868596 |

---
